# Supplementary material
Source: publisher figshare collection journal article supplement (https://frontiersin.figshare.com/ndownloader/files/25606676)
Supplement: Supplementary file 1 [file 25606676]

## Sheet: DICK_abundance
abundance	unique.adults	unique.juveniles	recaptures.adults	recaptures.juveniles	site	mesic	land.use	year	period	graze.months	current(aum/ac)	current.stocking.rate	history(aum/ac)	grazing.history	hay.months	burn.months	cowbird.adult	cowbird.hy	cowbird.female	precip.aug.may	avg.temp.aug.may	precip.june.july	avg.temp.june.july	precip.june	avg.temp.june	precip.july	avg.temp.july	precip.june.previous.year	precip.june.july.previous.year
3.30688e-05	2	0	0	0	CRME	3	2	2003	3-6	180	0	0	0	0	180	180	0	0	0	480.1	7.8	124.2	22.6	111.3	20.1	13	25.2	34.5	56.1
0.000115741	7	0	0	0	CRME	3	2	2003	7-10	180	0	0	0	0	180	180	0	0	0	480.1	7.8	124.2	22.6	111.3	20.1	13	25.2	34.5	56.1
5.78704e-05	4	0	0	0	CRME	3	2	2004	3-6	180	0	0	0	0	180	1	3	0	0	378	8.2	173.7	20.9	43.2	19.7	130.6	22.2	111.3	124.2
5.78704e-05	3	0	1	0	CRME	3	2	2004	7-10	180	0	0	0	0	180	2	0	0	0	378	8.2	173.7	20.9	43.2	19.7	130.6	22.2	111.3	124.2
0.000297619	6	0	0	0	CRME	3	2	2017	3-6	10	0	0	0.23	0.0930797	180	158	1	0	0	444.2	9.1	127.3	24	48.3	22.9	79	25	16	124.2
0	0	0	0	0	CRME	3	2	2017	7-10	11	0	0	0.23	0.0930797	180	159	0	0	0	444.2	9.1	127.3	24	48.3	22.9	79	25	16	124.2
0.000198413	4	0	0	0	CRME	3	2	2018	3-6	1	0	0	0.197	0.0797248	180	170	1	0	1	570.5	7.3	223	23.7	124.7	24	98.3	23.4	48.3	127.3
0	0	0	0	0	CRME	3	2	2018	7-10	2	0	0	0.197	0.0797248	180	171	0	0	0	570.5	7.3	223	23.7	124.7	24	98.3	23.4	48.3	127.3
0.000198413	4	0	0	0	CRME	3	2	2019	3-6	0	0.16	0.0647511	0.214	0.0866046	180	180	0	0	0	702.1	6.5	252.2	22.7	114.3	21.2	137.9	24.3	124.7	223
0	0	0	0	0	CRME	3	2	2019	7-10	0	0.36	0.14569	0.227	0.0918656	180	180	0	0	0	702.1	6.5	252.2	22.7	114.3	21.2	137.9	24.3	124.7	223
9.64506e-05	7	0	1	0	FETW	3.67	1	2005	3-6	21	0	0	0.834	0.337515	180	1	13	0	8	510.5	8.4	155.4	23.7	112	22.3	43.4	25	43.2	173.7
3.6169e-05	3	0	0	0	FETW	3.67	1	2005	7-10	22	0	0	0.834	0.337515	180	2	4	2	0	510.5	8.4	155.4	23.7	112	22.3	43.4	25	43.2	173.7
7.2338e-05	6	0	0	0	FETW	3.67	1	2006	3-6	0	2.2	0.890328	1.12	0.453258	180	13	7	0	3	379.7	9.3	152.7	24.1	91.4	22.9	61.2	25.3	112	155.4
2.41127e-05	2	0	0	0	FETW	3.67	1	2006	7-10	1	0	0	1.12	0.453258	180	14	0	0	0	379.7	9.3	152.7	24.1	91.4	22.9	61.2	25.3	112	155.4
7.89141e-05	6	0	0	0	FETW	3.67	1	2007	3-6	9	0	0	0.68	0.275192	180	25	6	0	2	709.7	7.6	182.4	23	72.6	21.4	109.7	24.6	91.4	152.7
3.94571e-05	3	0	0	0	FETW	3.67	1	2007	7-10	0	1.7	0.687981	1.02	0.412788	180	26	4	4	0	709.7	7.6	182.4	23	72.6	21.4	109.7	24.6	91.4	152.7
0.000115741	7	0	0	0	FONE	2	1	2003	3-6	9	0	0	0.714	0.288952	180	25	4	0	0	480.1	7.8	124.2	22.6	111.3	20.1	13	25.2	34.5	56.1
0.000198413	10	0	2	0	FONE	2	1	2003	7-10	10	0	0	0.714	0.288952	180	26	0	0	0	480.1	7.8	124.2	22.6	111.3	20.1	13	25.2	34.5	56.1
0.000245949	16	0	1	0	FONE	2	1	2004	3-6	21	0	0	0.56	0.226629	180	37	9	0	3	378	8.2	173.7	20.9	43.2	19.7	130.6	22.2	111.3	124.2
1.44676e-05	1	0	0	0	FONE	2	1	2004	7-10	22	0	0	0.56	0.226629	180	38	1	0	1	378	8.2	173.7	20.9	43.2	19.7	130.6	22.2	111.3	124.2
0.000156732	13	0	0	0	FONE	2	1	2005	3-6	0	2.4	0.971267	1.04	0.420882	180	1	6	0	2	510.5	8.4	155.4	23.7	112	22.3	43.4	25	43.2	173.7
3.6169e-05	3	0	0	0	FONE	2	1	2005	7-10	1	0	0	1.04	0.420882	180	2	5	2	1	510.5	8.4	155.4	23.7	112	22.3	43.4	25	43.2	173.7
0.000301408	25	0	0	0	FONE	2	1	2006	3-6	7	0	0	0.72	0.29138	180	13	3	0	3	379.7	9.3	152.7	24.1	91.4	22.9	61.2	25.3	112	155.4
0.000144676	12	4	0	0	FONE	2	1	2006	7-10	0	1.2	0.485633	0.96	0.388507	180	14	3	1	1	379.7	9.3	152.7	24.1	91.4	22.9	61.2	25.3	112	155.4
0.000157828	11	0	1	0	FONE	2	1	2007	3-6	9	0	0	0.72	0.29138	180	25	9	1	3	709.7	7.6	182.4	23	72.6	21.4	109.7	24.6	91.4	152.7
0.000131524	10	5	0	0	FONE	2	1	2007	7-10	10	0	0	0.72	0.29138	180	26	8	4	2	709.7	7.6	182.4	23	72.6	21.4	109.7	24.6	91.4	152.7
0.000868056	42	0	0	0	MOFE	2	1	2002	3-6	180	0	0	0	0	10	25	0	0	0	369.8	8.5	56.1	25.3	34.5	24.5	21.6	26.2	27.2	104.6
4.1336e-05	2	0	0	0	MOFE	2	1	2002	7-10	180	0	0	0	0	11	26	0	0	0	369.8	8.5	56.1	25.3	34.5	24.5	21.6	26.2	27.2	104.6
0.000214947	13	0	0	0	MOFE	2	1	2003	3-6	180	0	0	0	0	10	37	7	0	2	480.1	7.8	124.2	22.6	111.3	20.1	13	25.2	34.5	56.1
0.000165344	9	0	1	0	MOFE	2	1	2003	7-10	180	0	0	0	0	11	38	2	0	0	480.1	7.8	124.2	22.6	111.3	20.1	13	25.2	34.5	56.1
0.000202546	14	0	0	0	MOFE	2	1	2004	3-6	180	0	0	0	0	22	49	5	1	1	378	8.2	173.7	20.9	43.2	19.7	130.6	22.2	111.3	124.2
8.68056e-05	5	0	1	0	MOFE	2	1	2004	7-10	180	0	0	0	0	23	50	2	0	1	378	8.2	173.7	20.9	43.2	19.7	130.6	22.2	111.3	124.2
2.41127e-05	2	0	0	0	MOFE	2	1	2005	3-6	180	0	0	0	0	34	61	1	0	1	510.5	8.4	155.4	23.7	112	22.3	43.4	25	43.2	173.7
0	0	0	0	0	MOFE	2	1	2005	7-10	180	0	0	0	0	35	62	1	0	1	510.5	8.4	155.4	23.7	112	22.3	43.4	25	43.2	173.7
0.000108507	9	0	0	0	MOFE	2	1	2006	3-6	180	0	0	0	0	46	1	1	0	1	379.7	9.3	152.7	24.1	91.4	22.9	61.2	25.3	112	155.4
4.82253e-05	4	2	0	0	MOFE	2	1	2006	7-10	180	0	0	0	0	47	2	1	0	1	379.7	9.3	152.7	24.1	91.4	22.9	61.2	25.3	112	155.4
0.000249895	19	0	0	0	MOFE	2	1	2007	3-6	180	0	0	0	0	58	13	17	0	10	709.7	7.6	182.4	23	72.6	21.4	109.7	24.6	91.4	152.7
0.000210438	16	12	0	0	MOFE	2	1	2007	7-10	180	0	0	0	0	59	14	10	9	1	709.7	7.6	182.4	23	72.6	21.4	109.7	24.6	91.4	152.7
0	0	0	0	0	MOFE	2	1	2017	3-6	7	0	0	0.564	0.228248	180	49	6	0	3	444.2	9.1	127.3	24	48.3	22.9	79	25	16	124.2
0	0	1	0	0	MOFE	2	1	2017	7-10	8	0	0	0.564	0.228248	180	50	5	2	3	444.2	9.1	127.3	24	48.3	22.9	79	25	16	124.2
0.00014881	3	0	0	0	MOFE	2	1	2018	3-6	0	0.88	0.356131	0.904	0.365844	180	61	2	0	0	570.5	7.3	223	23.7	124.7	24	98.3	23.4	48.3	127.3
4.96032e-05	0	1	1	0	MOFE	2	1	2018	7-10	0	0.46	0.186159	0.862	0.348847	180	62	1	1	0	570.5	7.3	223	23.7	124.7	24	98.3	23.4	48.3	127.3
9.92063e-05	0	0	2	0	MOFE	2	1	2019	3-6	0	0.48	0.194253	1.023	0.414002	180	73	0	0	0	702.1	6.5	252.2	22.7	114.3	21.2	137.9	24.3	124.7	223
9.92063e-05	0	0	2	0	MOFE	2	1	2019	7-10	1	0	0	1.023	0.414002	180	74	0	0	0	702.1	6.5	252.2	22.7	114.3	21.2	137.9	24.3	124.7	223
0.000124008	6	0	0	0	MOFF	2.33	2	2002	3-6	23	0	0	0	0	180	26	0	0	0	369.8	8.5	56.1	25.3	34.5	24.5	21.6	26.2	27.2	104.6
8.2672e-05	4	0	0	0	MOFF	2.33	2	2002	7-10	24	0	0	0	0	180	27	0	0	0	369.8	8.5	56.1	25.3	34.5	24.5	21.6	26.2	27.2	104.6
0.000101273	7	0	0	0	MOFF	2.33	2	2004	3-6	0	2.6	1.05221	0.34	0.137596	180	50	6	0	2	378	8.2	173.7	20.9	43.2	19.7	130.6	22.2	111.3	124.2
0	0	0	0	0	MOFF	2.33	2	2004	7-10	1	0	0	0.54	0.218535	180	51	2	0	0	378	8.2	173.7	20.9	43.2	19.7	130.6	22.2	111.3	124.2
0	0	0	0	0	MOFF	2.33	2	2005	3-6	7	0	0	0.54	0.218535	180	62	12	2	6	510.5	8.4	155.4	23.7	112	22.3	43.4	25	43.2	173.7
2.41127e-05	2	0	0	0	MOFF	2.33	2	2005	7-10	0	1.5	0.607042	0.54	0.218535	180	63	3	1	0	510.5	8.4	155.4	23.7	112	22.3	43.4	25	43.2	173.7
9.64506e-05	8	0	0	0	MOFF	2.33	2	2006	3-6	9	0	0	0.88	0.356131	180	2	5	0	1	379.7	9.3	152.7	24.1	91.4	22.9	61.2	25.3	112	155.4
0	0	0	0	0	MOFF	2.33	2	2006	7-10	10	0	0	0.88	0.356131	180	3	2	1	1	379.7	9.3	152.7	24.1	91.4	22.9	61.2	25.3	112	155.4
2.63047e-05	2	0	0	0	MOFF	2.33	2	2007	3-6	0	1.7	0.687981	0.88	0.356131	180	1	20	4	9	709.7	7.6	182.4	23	72.6	21.4	109.7	24.6	91.4	152.7
1.31524e-05	1	0	0	0	MOFF	2.33	2	2007	7-10	1	0	0	1.22	0.493727	180	2	4	3	1	709.7	7.6	182.4	23	72.6	21.4	109.7	24.6	91.4	152.7
0.000115741	7	0	0	0	MOFR	3	1	2003	3-6	9	0	0	0.488	0.197491	180	13	3	0	3	480.1	7.8	124.2	22.6	111.3	20.1	13	25.2	34.5	56.1
3.30688e-05	2	0	0	0	MOFR	3	1	2003	7-10	10	0	0	0.488	0.197491	180	14	0	0	0	480.1	7.8	124.2	22.6	111.3	20.1	13	25.2	34.5	56.1
7.2338e-05	6	0	0	0	MOFR	3	1	2005	3-6	7	0	0	0.54	0.218535	180	37	17	0	6	510.5	8.4	155.4	23.7	112	22.3	43.4	25	43.2	173.7
2.41127e-05	2	0	0	0	MOFR	3	1	2005	7-10	0	1.6	0.647511	0.86	0.348037	180	38	1	1	0	510.5	8.4	155.4	23.7	112	22.3	43.4	25	43.2	173.7
0.000108507	9	0	0	0	MOFR	3	1	2006	3-6	9	0	0	0.86	0.348037	180	49	15	1	7	379.7	9.3	152.7	24.1	91.4	22.9	61.2	25.3	112	155.4
0.000108507	8	0	1	0	MOFR	3	1	2006	7-10	10	0	0	0.86	0.348037	180	50	3	2	0	379.7	9.3	152.7	24.1	91.4	22.9	61.2	25.3	112	155.4
6.57618e-05	5	0	0	0	MOFR	3	1	2007	3-6	21	0	0	0.66	0.267098	180	61	7	1	2	709.7	7.6	182.4	23	72.6	21.4	109.7	24.6	91.4	152.7
1.31524e-05	1	0	0	0	MOFR	3	1	2007	7-10	22	0	0	0.66	0.267098	180	62	7	3	2	709.7	7.6	182.4	23	72.6	21.4	109.7	24.6	91.4	152.7
0.00020668	10	0	0	0	MOFN	2.5	1	2002	3-6	7	0	0	0.84	0.339943	180	73	0	0	0	369.8	8.5	56.1	25.3	34.5	24.5	21.6	26.2	27.2	104.6
0	0	0	0	0	MOFN	2.5	1	2002	7-10	8	0	0	0.84	0.339943	180	74	0	0	0	369.8	8.5	56.1	25.3	34.5	24.5	21.6	26.2	27.2	104.6
4.34028e-05	3	0	0	0	MOFN	2.5	1	2004	3-6	7	0	0	0.914	0.369891	180	13	4	0	4	378	8.2	173.7	20.9	43.2	19.7	130.6	22.2	111.3	124.2
0	0	0	0	0	MOFN	2.5	1	2004	7-10	0	1.5	0.607042	1.214	0.491299	180	14	3	1	2	378	8.2	173.7	20.9	43.2	19.7	130.6	22.2	111.3	124.2
4.82253e-05	4	0	0	0	MOFN	2.5	1	2005	3-6	9	0	0	1.06	0.428976	180	25	6	0	2	510.5	8.4	155.4	23.7	112	22.3	43.4	25	43.2	173.7
0	0	0	0	0	MOFN	2.5	1	2005	7-10	10	0	0	1.06	0.428976	180	26	4	2	2	510.5	8.4	155.4	23.7	112	22.3	43.4	25	43.2	173.7
0.000168789	14	0	0	0	MOFN	2.5	1	2006	3-6	21	0	0	0.74	0.299474	180	37	9	0	6	379.7	9.3	152.7	24.1	91.4	22.9	61.2	25.3	112	155.4
0	0	0	0	0	MOFN	2.5	1	2006	7-10	22	0	0	0.74	0.299474	180	38	1	0	1	379.7	9.3	152.7	24.1	91.4	22.9	61.2	25.3	112	155.4
0	0	0	0	0	MOFN	2.5	1	2007	3-6	0	1.7	0.687981	1.08	0.43707	180	1	0	0	0	709.7	7.6	182.4	23	72.6	21.4	109.7	24.6	91.4	152.7
0	0	0	0	0	MOFN	2.5	1	2007	7-10	1	0	0	1.08	0.43707	180	2	3	0	1	709.7	7.6	182.4	23	72.6	21.4	109.7	24.6	91.4	152.7
4.96032e-05	3	0	0	0	NOME	2.67	1	2003	3-6	180	0	0	0	0	46	37	0	0	0	480.1	7.8	124.2	22.6	111.3	20.1	13	25.2	34.5	56.1
4.96032e-05	3	0	0	0	NOME	2.67	1	2003	7-10	180	0	0	0	0	47	38	0	0	0	480.1	7.8	124.2	22.6	111.3	20.1	13	25.2	34.5	56.1
0.000144676	10	0	0	0	NOME	2.67	1	2004	3-6	180	0	0	0	0	58	1	4	0	4	378	8.2	173.7	20.9	43.2	19.7	130.6	22.2	111.3	124.2
4.34028e-05	3	0	0	0	NOME	2.67	1	2004	7-10	180	0	0	0	0	59	2	4	0	3	378	8.2	173.7	20.9	43.2	19.7	130.6	22.2	111.3	124.2
0	0	0	0	0	NOME	2.67	1	2005	3-6	180	0	0	0	0	10	13	13	0	7	510.5	8.4	155.4	23.7	112	22.3	43.4	25	43.2	173.7
0	0	0	0	0	NOME	2.67	1	2005	7-10	180	0	0	0	0	11	14	1	0	0	510.5	8.4	155.4	23.7	112	22.3	43.4	25	43.2	173.7
3.6169e-05	3	0	0	0	NOME	2.67	1	2006	3-6	180	0	0	0	0	10	25	1	0	0	379.7	9.3	152.7	24.1	91.4	22.9	61.2	25.3	112	155.4
0	0	0	0	0	NOME	2.67	1	2006	7-10	180	0	0	0	0	11	26	1	0	1	379.7	9.3	152.7	24.1	91.4	22.9	61.2	25.3	112	155.4
0	0	0	0	0	NOME	2.67	1	2007	3-6	0	1.5	0.607042	0.3	0.121408	10	2	7	0	5	709.7	7.6	182.4	23	72.6	21.4	109.7	24.6	91.4	152.7
0	0	0	0	0	NOME	2.67	1	2007	7-10	0	1.5	0.607042	0.3	0.121408	11	3	2	0	1	709.7	7.6	182.4	23	72.6	21.4	109.7	24.6	91.4	152.7
0.000694444	14	0	0	0	NOME	2.67	1	2017	3-6	1	0	0	0.84	0.339943	115	13	0	0	0	444.2	9.1	127.3	24	48.3	22.9	79	25	16	124.2
9.92063e-05	2	0	0	0	NOME	2.67	1	2017	7-10	2	0	0	0.84	0.339943	116	14	0	0	0	444.2	9.1	127.3	24	48.3	22.9	79	25	16	124.2
0	0	0	0	0	NOME	2.67	1	2018	3-6	1	0	0	0.89	0.360178	127	25	5	0	1	570.5	7.3	223	23.7	124.7	24	98.3	23.4	48.3	127.3
4.96032e-05	1	1	0	0	NOME	2.67	1	2018	7-10	2	0	0	0.89	0.360178	128	26	0	0	0	570.5	7.3	223	23.7	124.7	24	98.3	23.4	48.3	127.3
0.000297619	5	0	1	0	NOME	2.67	1	2019	3-6	0	0.74	0.299474	1.05	0.424929	0	37	0	0	0	702.1	6.5	252.2	22.7	114.3	21.2	137.9	24.3	124.7	223
9.92063e-05	2	0	0	0	NOME	2.67	1	2019	7-10	1	0	0	1.81	0.732497	1	38	1	1	0	702.1	6.5	252.2	22.7	114.3	21.2	137.9	24.3	124.7	223
0.000227348	11	0	0	0	WRBS	2.33	1	2002	3-6	9	0	0	0.84	0.339943	180	1	0	0	0	369.8	8.5	56.1	25.3	34.5	24.5	21.6	26.2	27.2	104.6
0.000144676	7	0	0	0	WRBS	2.33	1	2002	7-10	10	0	0	0.84	0.339943	180	2	0	0	0	369.8	8.5	56.1	25.3	34.5	24.5	21.6	26.2	27.2	104.6
8.2672e-05	4	0	1	0	WRBS	2.33	1	2003	3-6	0	2	0.809389	1.24	0.501821	180	1	2	0	0	480.1	7.8	124.2	22.6	111.3	20.1	13	25.2	34.5	56.1
8.2672e-05	5	1	0	0	WRBS	2.33	1	2003	7-10	0	2	0.809389	1.24	0.501821	180	2	0	0	0	480.1	7.8	124.2	22.6	111.3	20.1	13	25.2	34.5	56.1
1.44676e-05	1	0	0	0	WRBS	2.33	1	2004	3-6	10	0	0	0.78	0.315662	180	13	2	0	1	378	8.2	173.7	20.9	43.2	19.7	130.6	22.2	111.3	124.2
0	0	0	0	0	WRBS	2.33	1	2004	7-10	0	1.3	0.526103	1.04	0.420882	180	14	0	0	0	378	8.2	173.7	20.9	43.2	19.7	130.6	22.2	111.3	124.2
9.64506e-05	7	0	1	0	WRBS	2.33	1	2006	3-6	8	0	0	0.92	0.372319	180	37	8	0	4	379.7	9.3	152.7	24.1	91.4	22.9	61.2	25.3	112	155.4
1.20563e-05	1	0	0	0	WRBS	2.33	1	2006	7-10	9	0	0	0.92	0.372319	180	38	0	0	0	379.7	9.3	152.7	24.1	91.4	22.9	61.2	25.3	112	155.4
4.1336e-05	2	0	0	0	WRPM	3	2	2002	3-6	180	0	0	0	0	10	25	0	0	0	369.8	8.5	56.1	25.3	34.5	24.5	21.6	26.2	27.2	104.6
4.1336e-05	2	0	0	0	WRPM	3	2	2002	7-10	180	0	0	0	0	11	26	0	0	0	369.8	8.5	56.1	25.3	34.5	24.5	21.6	26.2	27.2	104.6
6.61376e-05	4	0	0	0	WRPM	3	2	2003	3-6	180	0	0	0	0	10	37	1	1	0	480.1	7.8	124.2	22.6	111.3	20.1	13	25.2	34.5	56.1
0	0	0	0	0	WRPM	3	2	2003	7-10	180	0	0	0	0	11	38	0	0	0	480.1	7.8	124.2	22.6	111.3	20.1	13	25.2	34.5	56.1
0	0	0	0	0	WRPM	3	2	2004	3-6	180	0	0	0	0	10	49	5	0	2	378	8.2	173.7	20.9	43.2	19.7	130.6	22.2	111.3	124.2
0	0	0	0	0	WRPM	3	2	2004	7-10	180	0	0	0	0	11	50	1	0	1	378	8.2	173.7	20.9	43.2	19.7	130.6	22.2	111.3	124.2
2.41127e-05	2	0	0	0	WRPM	3	2	2005	3-6	180	0	0	0	0	22	61	8	0	4	510.5	8.4	155.4	23.7	112	22.3	43.4	25	43.2	173.7
0	0	0	0	0	WRPM	3	2	2005	7-10	180	0	0	0	0	23	62	3	0	2	510.5	8.4	155.4	23.7	112	22.3	43.4	25	43.2	173.7
0.000192901	16	0	0	0	WRPM	3	2	2006	3-6	180	0	0	0	0	34	73	11	0	5	379.7	9.3	152.7	24.1	91.4	22.9	61.2	25.3	112	155.4
1.20563e-05	1	0	0	0	WRPM	3	2	2006	7-10	180	0	0	0	0	35	74	0	0	0	379.7	9.3	152.7	24.1	91.4	22.9	61.2	25.3	112	155.4
0	0	0	0	0	WRPM	3	2	2007	3-6	0	1.5	0.607042	0	0	46	1	4	0	2	709.7	7.6	182.4	23	72.6	21.4	109.7	24.6	91.4	152.7
0	0	0	0	0	WRPM	3	2	2007	7-10	0	1.5	0.607042	0	0	47	2	3	1	2	709.7	7.6	182.4	23	72.6	21.4	109.7	24.6	91.4	152.7
0.00014881	3	0	0	0	WRPM	3	2	2017	3-6	67	0	0	0	0	9	110	2	0	2	444.2	9.1	127.3	24	48.3	22.9	79	25	16	124.2
4.96032e-05	1	0	0	0	WRPM	3	2	2017	7-10	68	0	0	0	0	10	111	1	0	1	444.2	9.1	127.3	24	48.3	22.9	79	25	16	124.2
9.92063e-05	2	0	0	0	WRPM	3	2	2018	3-6	79	0	0	0	0	9	1	0	0	0	570.5	7.3	223	23.7	124.7	24	98.3	23.4	48.3	127.3
4.96032e-05	1	0	0	0	WRPM	3	2	2018	7-10	80	0	0	0	0	10	2	0	0	0	570.5	7.3	223	23.7	124.7	24	98.3	23.4	48.3	127.3
0	0	0	0	0	WRPM	3	2	2019	3-6	91	0	0	0	0	9	13	0	0	0	702.1	6.5	252.2	22.7	114.3	21.2	137.9	24.3	124.7	223
0.00014881	3	0	0	0	WRPM	3	2	2019	7-10	92	0	0	0	0	10	14	0	0	0	702.1	6.5	252.2	22.7	114.3	21.2	137.9	24.3	124.7	223
0.000144676	7	0	0	0	MOFT	4	1	2002	3-6	70	0	0	0.518	0.209632	180	13	0	0	0	369.8	8.5	56.1	25.3	34.5	24.5	21.6	26.2	27.2	104.6
4.1336e-05	2	0	0	0	MOFT	4	1	2002	7-10	71	0	0	0.518	0.209632	180	14	0	0	0	369.8	8.5	56.1	25.3	34.5	24.5	21.6	26.2	27.2	104.6
0.000198413	12	0	0	0	MOFT	4	1	2003	3-6	0	1.7	0.687981	0.322	0.130312	180	25	7	1	3	480.1	7.8	124.2	22.6	111.3	20.1	13	25.2	34.5	56.1
3.30688e-05	2	0	0	0	MOFT	4	1	2003	7-10	1	0	0	0.322	0.130312	180	26	0	0	0	480.1	7.8	124.2	22.6	111.3	20.1	13	25.2	34.5	56.1
1.44676e-05	1	0	0	0	MOFT	4	1	2004	3-6	7	0	0	0.674	0.272764	180	2	6	1	4	378	8.2	173.7	20.9	43.2	19.7	130.6	22.2	111.3	124.2
0	0	0	0	0	MOFT	4	1	2004	7-10	0	1	0.404694	0.674	0.272764	180	3	2	0	1	378	8.2	173.7	20.9	43.2	19.7	130.6	22.2	111.3	124.2
0.000217014	18	0	0	0	MOFT	4	1	2005	3-6	9	0	0	0.52	0.210441	180	14	14	1	7	510.5	8.4	155.4	23.7	112	22.3	43.4	25	43.2	173.7
1.20563e-05	1	0	0	0	MOFT	4	1	2005	7-10	10	0	0	0.82	0.331849	180	15	7	2	3	510.5	8.4	155.4	23.7	112	22.3	43.4	25	43.2	173.7
0.000192901	16	0	0	0	MOFT	4	1	2006	3-6	0	1.7	0.687981	0.82	0.331849	180	26	7	0	5	379.7	9.3	152.7	24.1	91.4	22.9	61.2	25.3	112	155.4
7.2338e-05	5	1	1	0	MOFT	4	1	2006	7-10	1	0	0	0.82	0.331849	180	27	2	2	0	379.7	9.3	152.7	24.1	91.4	22.9	61.2	25.3	112	155.4
2.63047e-05	2	0	0	0	MOFT	4	1	2007	3-6	7	0	0	1.16	0.469446	180	1	10	1	5	709.7	7.6	182.4	23	72.6	21.4	109.7	24.6	91.4	152.7
0	0	0	0	0	MOFT	4	1	2007	7-10	0	1.7	0.687981	1.16	0.469446	180	2	5	3	2	709.7	7.6	182.4	23	72.6	21.4	109.7	24.6	91.4	152.7
6.02816e-05	5	0	0	0	MOPT	3.5	1	2005	3-6	0	1.7	0.687981	0.936	0.378794	180	1	7	0	3	510.5	8.4	155.4	23.7	112	22.3	43.4	25	43.2	173.7
2.41127e-05	2	0	0	0	MOPT	3.5	1	2005	7-10	1	0	0	0.936	0.378794	180	2	3	2	1	510.5	8.4	155.4	23.7	112	22.3	43.4	25	43.2	173.7
0.000265239	22	0	0	0	MOPT	3.5	1	2006	3-6	7	0	0	0.88	0.356131	180	13	3	0	1	379.7	9.3	152.7	24.1	91.4	22.9	61.2	25.3	112	155.4
0.00013262	11	4	0	0	MOPT	3.5	1	2006	7-10	0	1	0.404694	1.08	0.43707	180	14	3	1	1	379.7	9.3	152.7	24.1	91.4	22.9	61.2	25.3	112	155.4
0.000144676	11	0	0	0	MOPT	3.5	1	2007	3-6	9	0	0	0.74	0.299474	180	25	11	1	6	709.7	7.6	182.4	23	72.6	21.4	109.7	24.6	91.4	152.7
0	0	0	0	0	MOPT	3.5	1	2007	7-10	10	0	0	0.74	0.299474	180	26	1	1	0	709.7	7.6	182.4	23	72.6	21.4	109.7	24.6	91.4	152.7
0	0	0	0	0	OFPA	3	2	2003	3-6	0	2.1	0.849858	2.16	0.87414	180	66	3	0	3	480.1	7.8	124.2	22.6	111.3	20.1	13	25.2	34.5	56.1
1.65344e-05	1	0	0	0	OFPA	3	2	2003	7-10	1	0	0	2.16	0.87414	180	67	0	0	0	480.1	7.8	124.2	22.6	111.3	20.1	13	25.2	34.5	56.1
0	0	0	0	0	OFPA	3	2	2004	3-6	0	2.1	0.849858	2.14	0.866046	180	78	7	0	3	378	8.2	173.7	20.9	43.2	19.7	130.6	22.2	111.3	124.2
2.89352e-05	2	0	0	0	OFPA	3	2	2004	7-10	1	0	0	2.14	0.866046	180	79	1	1	1	378	8.2	173.7	20.9	43.2	19.7	130.6	22.2	111.3	124.2
0.000131524	10	0	0	0	OFPA	3	2	2007	3-6	0	1.5	0.607042	1.86	0.752732	180	1	8	0	6	709.7	7.6	182.4	23	72.6	21.4	109.7	24.6	91.4	152.7
0	0	0	0	0	OFPA	3	2	2007	7-10	0	1.5	0.607042	1.86	0.752732	180	2	1	0	1	709.7	7.6	182.4	23	72.6	21.4	109.7	24.6	91.4	152.7
3.30688e-05	2	0	0	0	MOFL	2.33	2	2003	3-6	180	0	0	0	0	10	37	1	0	1	480.1	7.8	124.2	22.6	111.3	20.1	13	25.2	34.5	56.1
9.92063e-05	6	0	0	0	MOFL	2.33	2	2003	7-10	180	0	0	0	0	11	38	0	0	0	480.1	7.8	124.2	22.6	111.3	20.1	13	25.2	34.5	56.1
0.000165344	8	0	0	0	MOFV	2	2	2002	3-6	180	0	0	0	0	32	73	0	0	0	369.8	8.5	56.1	25.3	34.5	24.5	21.6	26.2	27.2	104.6
4.1336e-05	2	0	0	0	MOFV	2	2	2002	7-10	180	0	0	0	0	33	74	0	0	0	369.8	8.5	56.1	25.3	34.5	24.5	21.6	26.2	27.2	104.6
2.41127e-05	2	0	0	0	MOFV	2	2	2005	3-6	180	0	0	0	0	10	109	1	0	1	510.5	8.4	155.4	23.7	112	22.3	43.4	25	43.2	173.7
1.20563e-05	1	0	0	0	MOFV	2	2	2005	7-10	180	0	0	0	0	11	110	4	0	2	510.5	8.4	155.4	23.7	112	22.3	43.4	25	43.2	173.7
2.41127e-05	2	0	0	0	MOFV	2	2	2006	3-6	180	0	0	0	0	180	121	3	0	2	379.7	9.3	152.7	24.1	91.4	22.9	61.2	25.3	112	155.4
2.41127e-05	2	0	0	0	MOFV	2	2	2006	7-10	180	0	0	0	0	11	122	2	2	0	379.7	9.3	152.7	24.1	91.4	22.9	61.2	25.3	112	155.4
4.82253e-05	4	0	0	0	WRMP	3	1	2005	3-6	8	0	0	0.92	0.372319	180	37	11	0	4	510.5	8.4	155.4	23.7	112	22.3	43.4	25	43.2	173.7
3.6169e-05	3	0	0	0	WRMP	3	1	2005	7-10	9	0	0	0.92	0.372319	180	38	0	0	0	510.5	8.4	155.4	23.7	112	22.3	43.4	25	43.2	173.7
4.1336e-05	2	0	0	0	MOFS	2.67	1	2002	3-6	180	0	0	0	0	32	89	0	0	0	369.8	8.5	56.1	25.3	34.5	24.5	21.6	26.2	27.2	104.6
0	0	0	0	0	MOFS	2.67	1	2002	7-10	180	0	0	0	0	33	90	0	0	0	369.8	8.5	56.1	25.3	34.5	24.5	21.6	26.2	27.2	104.6

## Sheet: DICK_HY
HY	site	mesic	land.use	year	period	graze.months	current(aum/ac)	current.stocking.rate	history(aum/ac)	grazing.history	hay.months	burn.months	cowbird.adults	cowbird.hy	cowbird.female	precip.aug.may	avg.temp.aug.may	precip.june.july	avg.temp.june.july	precip.june	avg.temp.june	precip.july	avg.temp.july	precip.june.previous.year	precip.june.july.previous.year
0	CRME	3	2	2003	3-6	180	0	0	0	0	180	180	0	0	0	480.1	7.8	124.2	22.6	111.3	20.1	13	25.2	34.5	56.1
0	CRME	3	2	2003	3-6	180	0	0	0	0	180	180	0	0	0	480.1	7.8	124.2	22.6	111.3	20.1	13	25.2	34.5	56.1
0	CRME	3	2	2003	7-10	180	0	0	0	0	180	180	0	0	0	480.1	7.8	124.2	22.6	111.3	20.1	13	25.2	34.5	56.1
0	CRME	3	2	2003	7-10	180	0	0	0	0	180	180	0	0	0	480.1	7.8	124.2	22.6	111.3	20.1	13	25.2	34.5	56.1
0	CRME	3	2	2003	7-10	180	0	0	0	0	180	180	0	0	0	480.1	7.8	124.2	22.6	111.3	20.1	13	25.2	34.5	56.1
0	CRME	3	2	2003	7-10	180	0	0	0	0	180	180	0	0	0	480.1	7.8	124.2	22.6	111.3	20.1	13	25.2	34.5	56.1
0	CRME	3	2	2003	7-10	180	0	0	0	0	180	180	0	0	0	480.1	7.8	124.2	22.6	111.3	20.1	13	25.2	34.5	56.1
0	CRME	3	2	2003	7-10	180	0	0	0	0	180	180	0	0	0	480.1	7.8	124.2	22.6	111.3	20.1	13	25.2	34.5	56.1
0	CRME	3	2	2003	7-10	180	0	0	0	0	180	180	0	0	0	480.1	7.8	124.2	22.6	111.3	20.1	13	25.2	34.5	56.1
0	CRME	3	2	2004	3-6	180	0	0	0	0	180	1	3	0	0	378	8.2	173.7	20.9	43.2	19.7	130.6	22.2	111.3	124.2
0	CRME	3	2	2004	3-6	180	0	0	0	0	180	1	3	0	0	378	8.2	173.7	20.9	43.2	19.7	130.6	22.2	111.3	124.2
0	CRME	3	2	2004	3-6	180	0	0	0	0	180	1	3	0	0	378	8.2	173.7	20.9	43.2	19.7	130.6	22.2	111.3	124.2
0	CRME	3	2	2004	3-6	180	0	0	0	0	180	1	3	0	0	378	8.2	173.7	20.9	43.2	19.7	130.6	22.2	111.3	124.2
0	CRME	3	2	2004	7-10	180	0	0	0	0	180	2	0	0	0	378	8.2	173.7	20.9	43.2	19.7	130.6	22.2	111.3	124.2
0	CRME	3	2	2004	7-10	180	0	0	0	0	180	2	0	0	0	378	8.2	173.7	20.9	43.2	19.7	130.6	22.2	111.3	124.2
0	CRME	3	2	2004	7-10	180	0	0	0	0	180	2	0	0	0	378	8.2	173.7	20.9	43.2	19.7	130.6	22.2	111.3	124.2
0	CRME	3	2	2004	7-10	180	0	0	0	0	180	2	0	0	0	378	8.2	173.7	20.9	43.2	19.7	130.6	22.2	111.3	124.2
0	CRME	3	2	2017	3-6	10	0	0	0.23	0.0930797	180	158	1	0	0	444.2	9.1	127.3	24	48.3	22.9	79	25	16	124.2
0	CRME	3	2	2017	3-6	10	0	0	0.23	0.0930797	180	158	1	0	0	444.2	9.1	127.3	24	48.3	22.9	79	25	16	124.2
0	CRME	3	2	2017	3-6	10	0	0	0.23	0.0930797	180	158	1	0	0	444.2	9.1	127.3	24	48.3	22.9	79	25	16	124.2
0	CRME	3	2	2017	3-6	10	0	0	0.23	0.0930797	180	158	1	0	0	444.2	9.1	127.3	24	48.3	22.9	79	25	16	124.2
0	CRME	3	2	2017	3-6	10	0	0	0.23	0.0930797	180	158	1	0	0	444.2	9.1	127.3	24	48.3	22.9	79	25	16	124.2
0	CRME	3	2	2017	3-6	10	0	0	0.23	0.0930797	180	158	1	0	0	444.2	9.1	127.3	24	48.3	22.9	79	25	16	124.2
0	CRME	3	2	2018	3-6	1	0	0	0.197	0.0797248	180	170	1	0	1	570.5	7.3	223	23.7	124.7	24	98.3	23.4	48.3	127.3
0	CRME	3	2	2018	3-6	1	0	0	0.197	0.0797248	180	170	1	0	1	570.5	7.3	223	23.7	124.7	24	98.3	23.4	48.3	127.3
0	CRME	3	2	2018	3-6	1	0	0	0.197	0.0797248	180	170	1	0	1	570.5	7.3	223	23.7	124.7	24	98.3	23.4	48.3	127.3
0	CRME	3	2	2018	3-6	1	0	0	0.197	0.0797248	180	170	1	0	1	570.5	7.3	223	23.7	124.7	24	98.3	23.4	48.3	127.3
0	CRME	3	2	2019	3-6	0	0.16	0.0647511	0.214	0.0866046	180	180	0	0	0	702.1	6.5	252.2	22.7	114.3	21.2	137.9	24.3	124.7	223
0	CRME	3	2	2019	3-6	0	0.16	0.0647511	0.214	0.0866046	180	180	0	0	0	702.1	6.5	252.2	22.7	114.3	21.2	137.9	24.3	124.7	223
0	CRME	3	2	2019	3-6	0	0.16	0.0647511	0.214	0.0866046	180	180	0	0	0	702.1	6.5	252.2	22.7	114.3	21.2	137.9	24.3	124.7	223
0	CRME	3	2	2019	3-6	0	0.16	0.0647511	0.214	0.0866046	180	180	0	0	0	702.1	6.5	252.2	22.7	114.3	21.2	137.9	24.3	124.7	223
0	FETW	3.67	1	2005	3-6	21	0	0	0.834	0.337515	180	1	13	0	8	510.5	8.4	155.4	23.7	112	22.3	43.4	25	43.2	173.7
0	FETW	3.67	1	2005	3-6	21	0	0	0.834	0.337515	180	1	13	0	8	510.5	8.4	155.4	23.7	112	22.3	43.4	25	43.2	173.7
0	FETW	3.67	1	2005	3-6	21	0	0	0.834	0.337515	180	1	13	0	8	510.5	8.4	155.4	23.7	112	22.3	43.4	25	43.2	173.7
0	FETW	3.67	1	2005	3-6	21	0	0	0.834	0.337515	180	1	13	0	8	510.5	8.4	155.4	23.7	112	22.3	43.4	25	43.2	173.7
0	FETW	3.67	1	2005	3-6	21	0	0	0.834	0.337515	180	1	13	0	8	510.5	8.4	155.4	23.7	112	22.3	43.4	25	43.2	173.7
0	FETW	3.67	1	2005	3-6	21	0	0	0.834	0.337515	180	1	13	0	8	510.5	8.4	155.4	23.7	112	22.3	43.4	25	43.2	173.7
0	FETW	3.67	1	2005	3-6	21	0	0	0.834	0.337515	180	1	13	0	8	510.5	8.4	155.4	23.7	112	22.3	43.4	25	43.2	173.7
0	FETW	3.67	1	2005	3-6	21	0	0	0.834	0.337515	180	1	13	0	8	510.5	8.4	155.4	23.7	112	22.3	43.4	25	43.2	173.7
0	FETW	3.67	1	2005	7-10	22	0	0	0.834	0.337515	180	2	4	2	0	510.5	8.4	155.4	23.7	112	22.3	43.4	25	43.2	173.7
0	FETW	3.67	1	2005	7-10	22	0	0	0.834	0.337515	180	2	4	2	0	510.5	8.4	155.4	23.7	112	22.3	43.4	25	43.2	173.7
0	FETW	3.67	1	2005	7-10	22	0	0	0.834	0.337515	180	2	4	2	0	510.5	8.4	155.4	23.7	112	22.3	43.4	25	43.2	173.7
0	FETW	3.67	1	2006	3-6	0	2.2	0.890328	1.12	0.453258	180	13	7	0	3	379.7	9.3	152.7	24.1	91.4	22.9	61.2	25.3	112	155.4
0	FETW	3.67	1	2006	3-6	0	2.2	0.890328	1.12	0.453258	180	13	7	0	3	379.7	9.3	152.7	24.1	91.4	22.9	61.2	25.3	112	155.4
0	FETW	3.67	1	2006	3-6	0	2.2	0.890328	1.12	0.453258	180	13	7	0	3	379.7	9.3	152.7	24.1	91.4	22.9	61.2	25.3	112	155.4
0	FETW	3.67	1	2006	3-6	0	2.2	0.890328	1.12	0.453258	180	13	7	0	3	379.7	9.3	152.7	24.1	91.4	22.9	61.2	25.3	112	155.4
0	FETW	3.67	1	2006	3-6	0	2.2	0.890328	1.12	0.453258	180	13	7	0	3	379.7	9.3	152.7	24.1	91.4	22.9	61.2	25.3	112	155.4
0	FETW	3.67	1	2006	3-6	0	2.2	0.890328	1.12	0.453258	180	13	7	0	3	379.7	9.3	152.7	24.1	91.4	22.9	61.2	25.3	112	155.4
0	FETW	3.67	1	2006	7-10	1	0	0	1.12	0.453258	180	14	0	0	0	379.7	9.3	152.7	24.1	91.4	22.9	61.2	25.3	112	155.4
0	FETW	3.67	1	2006	7-10	1	0	0	1.12	0.453258	180	14	0	0	0	379.7	9.3	152.7	24.1	91.4	22.9	61.2	25.3	112	155.4
0	FETW	3.67	1	2007	3-6	9	0	0	0.68	0.275192	180	25	6	0	2	709.7	7.6	182.4	23	72.6	21.4	109.7	24.6	91.4	152.7
0	FETW	3.67	1	2007	3-6	9	0	0	0.68	0.275192	180	25	6	0	2	709.7	7.6	182.4	23	72.6	21.4	109.7	24.6	91.4	152.7
0	FETW	3.67	1	2007	3-6	9	0	0	0.68	0.275192	180	25	6	0	2	709.7	7.6	182.4	23	72.6	21.4	109.7	24.6	91.4	152.7
0	FETW	3.67	1	2007	3-6	9	0	0	0.68	0.275192	180	25	6	0	2	709.7	7.6	182.4	23	72.6	21.4	109.7	24.6	91.4	152.7
0	FETW	3.67	1	2007	3-6	9	0	0	0.68	0.275192	180	25	6	0	2	709.7	7.6	182.4	23	72.6	21.4	109.7	24.6	91.4	152.7
0	FETW	3.67	1	2007	3-6	9	0	0	0.68	0.275192	180	25	6	0	2	709.7	7.6	182.4	23	72.6	21.4	109.7	24.6	91.4	152.7
0	FETW	3.67	1	2007	7-10	0	1.7	0.687981	1.02	0.412788	180	26	4	4	0	709.7	7.6	182.4	23	72.6	21.4	109.7	24.6	91.4	152.7
0	FETW	3.67	1	2007	7-10	0	1.7	0.687981	1.02	0.412788	180	26	4	4	0	709.7	7.6	182.4	23	72.6	21.4	109.7	24.6	91.4	152.7
0	FETW	3.67	1	2007	7-10	0	1.7	0.687981	1.02	0.412788	180	26	4	4	0	709.7	7.6	182.4	23	72.6	21.4	109.7	24.6	91.4	152.7
0	FONE	2	1	2003	3-6	9	0	0	0.714	0.288952	180	25	4	0	0	480.1	7.8	124.2	22.6	111.3	20.1	13	25.2	34.5	56.1
0	FONE	2	1	2003	3-6	9	0	0	0.714	0.288952	180	25	4	0	0	480.1	7.8	124.2	22.6	111.3	20.1	13	25.2	34.5	56.1
0	FONE	2	1	2003	3-6	9	0	0	0.714	0.288952	180	25	4	0	0	480.1	7.8	124.2	22.6	111.3	20.1	13	25.2	34.5	56.1
0	FONE	2	1	2003	3-6	9	0	0	0.714	0.288952	180	25	4	0	0	480.1	7.8	124.2	22.6	111.3	20.1	13	25.2	34.5	56.1
0	FONE	2	1	2003	3-6	9	0	0	0.714	0.288952	180	25	4	0	0	480.1	7.8	124.2	22.6	111.3	20.1	13	25.2	34.5	56.1
0	FONE	2	1	2003	3-6	9	0	0	0.714	0.288952	180	25	4	0	0	480.1	7.8	124.2	22.6	111.3	20.1	13	25.2	34.5	56.1
0	FONE	2	1	2003	3-6	9	0	0	0.714	0.288952	180	25	4	0	0	480.1	7.8	124.2	22.6	111.3	20.1	13	25.2	34.5	56.1
0	FONE	2	1	2003	7-10	10	0	0	0.714	0.288952	180	26	0	0	0	480.1	7.8	124.2	22.6	111.3	20.1	13	25.2	34.5	56.1
0	FONE	2	1	2003	7-10	10	0	0	0.714	0.288952	180	26	0	0	0	480.1	7.8	124.2	22.6	111.3	20.1	13	25.2	34.5	56.1
0	FONE	2	1	2003	7-10	10	0	0	0.714	0.288952	180	26	0	0	0	480.1	7.8	124.2	22.6	111.3	20.1	13	25.2	34.5	56.1
0	FONE	2	1	2003	7-10	10	0	0	0.714	0.288952	180	26	0	0	0	480.1	7.8	124.2	22.6	111.3	20.1	13	25.2	34.5	56.1
0	FONE	2	1	2003	7-10	10	0	0	0.714	0.288952	180	26	0	0	0	480.1	7.8	124.2	22.6	111.3	20.1	13	25.2	34.5	56.1
0	FONE	2	1	2003	7-10	10	0	0	0.714	0.288952	180	26	0	0	0	480.1	7.8	124.2	22.6	111.3	20.1	13	25.2	34.5	56.1
0	FONE	2	1	2003	7-10	10	0	0	0.714	0.288952	180	26	0	0	0	480.1	7.8	124.2	22.6	111.3	20.1	13	25.2	34.5	56.1
0	FONE	2	1	2003	7-10	10	0	0	0.714	0.288952	180	26	0	0	0	480.1	7.8	124.2	22.6	111.3	20.1	13	25.2	34.5	56.1
0	FONE	2	1	2003	7-10	10	0	0	0.714	0.288952	180	26	0	0	0	480.1	7.8	124.2	22.6	111.3	20.1	13	25.2	34.5	56.1
0	FONE	2	1	2003	7-10	10	0	0	0.714	0.288952	180	26	0	0	0	480.1	7.8	124.2	22.6	111.3	20.1	13	25.2	34.5	56.1
0	FONE	2	1	2003	7-10	10	0	0	0.714	0.288952	180	26	0	0	0	480.1	7.8	124.2	22.6	111.3	20.1	13	25.2	34.5	56.1
0	FONE	2	1	2003	7-10	10	0	0	0.714	0.288952	180	26	0	0	0	480.1	7.8	124.2	22.6	111.3	20.1	13	25.2	34.5	56.1
0	FONE	2	1	2004	3-6	21	0	0	0.56	0.226629	180	37	9	0	3	378	8.2	173.7	20.9	43.2	19.7	130.6	22.2	111.3	124.2
0	FONE	2	1	2004	3-6	21	0	0	0.56	0.226629	180	37	9	0	3	378	8.2	173.7	20.9	43.2	19.7	130.6	22.2	111.3	124.2
0	FONE	2	1	2004	3-6	21	0	0	0.56	0.226629	180	37	9	0	3	378	8.2	173.7	20.9	43.2	19.7	130.6	22.2	111.3	124.2
0	FONE	2	1	2004	3-6	21	0	0	0.56	0.226629	180	37	9	0	3	378	8.2	173.7	20.9	43.2	19.7	130.6	22.2	111.3	124.2
0	FONE	2	1	2004	3-6	21	0	0	0.56	0.226629	180	37	9	0	3	378	8.2	173.7	20.9	43.2	19.7	130.6	22.2	111.3	124.2
0	FONE	2	1	2004	3-6	21	0	0	0.56	0.226629	180	37	9	0	3	378	8.2	173.7	20.9	43.2	19.7	130.6	22.2	111.3	124.2
0	FONE	2	1	2004	3-6	21	0	0	0.56	0.226629	180	37	9	0	3	378	8.2	173.7	20.9	43.2	19.7	130.6	22.2	111.3	124.2
0	FONE	2	1	2004	3-6	21	0	0	0.56	0.226629	180	37	9	0	3	378	8.2	173.7	20.9	43.2	19.7	130.6	22.2	111.3	124.2
0	FONE	2	1	2004	3-6	21	0	0	0.56	0.226629	180	37	9	0	3	378	8.2	173.7	20.9	43.2	19.7	130.6	22.2	111.3	124.2
0	FONE	2	1	2004	3-6	21	0	0	0.56	0.226629	180	37	9	0	3	378	8.2	173.7	20.9	43.2	19.7	130.6	22.2	111.3	124.2
0	FONE	2	1	2004	3-6	21	0	0	0.56	0.226629	180	37	9	0	3	378	8.2	173.7	20.9	43.2	19.7	130.6	22.2	111.3	124.2
0	FONE	2	1	2004	3-6	21	0	0	0.56	0.226629	180	37	9	0	3	378	8.2	173.7	20.9	43.2	19.7	130.6	22.2	111.3	124.2
0	FONE	2	1	2004	3-6	21	0	0	0.56	0.226629	180	37	9	0	3	378	8.2	173.7	20.9	43.2	19.7	130.6	22.2	111.3	124.2
0	FONE	2	1	2004	3-6	21	0	0	0.56	0.226629	180	37	9	0	3	378	8.2	173.7	20.9	43.2	19.7	130.6	22.2	111.3	124.2
0	FONE	2	1	2004	3-6	21	0	0	0.56	0.226629	180	37	9	0	3	378	8.2	173.7	20.9	43.2	19.7	130.6	22.2	111.3	124.2
0	FONE	2	1	2004	3-6	21	0	0	0.56	0.226629	180	37	9	0	3	378	8.2	173.7	20.9	43.2	19.7	130.6	22.2	111.3	124.2
0	FONE	2	1	2004	3-6	21	0	0	0.56	0.226629	180	37	9	0	3	378	8.2	173.7	20.9	43.2	19.7	130.6	22.2	111.3	124.2
0	FONE	2	1	2004	7-10	22	0	0	0.56	0.226629	180	38	1	0	1	378	8.2	173.7	20.9	43.2	19.7	130.6	22.2	111.3	124.2
0	FONE	2	1	2005	3-6	0	2.4	0.971267	1.04	0.420882	180	1	6	0	2	510.5	8.4	155.4	23.7	112	22.3	43.4	25	43.2	173.7
0	FONE	2	1	2005	3-6	0	2.4	0.971267	1.04	0.420882	180	1	6	0	2	510.5	8.4	155.4	23.7	112	22.3	43.4	25	43.2	173.7
0	FONE	2	1	2005	3-6	0	2.4	0.971267	1.04	0.420882	180	1	6	0	2	510.5	8.4	155.4	23.7	112	22.3	43.4	25	43.2	173.7
0	FONE	2	1	2005	3-6	0	2.4	0.971267	1.04	0.420882	180	1	6	0	2	510.5	8.4	155.4	23.7	112	22.3	43.4	25	43.2	173.7
0	FONE	2	1	2005	3-6	0	2.4	0.971267	1.04	0.420882	180	1	6	0	2	510.5	8.4	155.4	23.7	112	22.3	43.4	25	43.2	173.7
0	FONE	2	1	2005	3-6	0	2.4	0.971267	1.04	0.420882	180	1	6	0	2	510.5	8.4	155.4	23.7	112	22.3	43.4	25	43.2	173.7
0	FONE	2	1	2005	3-6	0	2.4	0.971267	1.04	0.420882	180	1	6	0	2	510.5	8.4	155.4	23.7	112	22.3	43.4	25	43.2	173.7
0	FONE	2	1	2005	3-6	0	2.4	0.971267	1.04	0.420882	180	1	6	0	2	510.5	8.4	155.4	23.7	112	22.3	43.4	25	43.2	173.7
0	FONE	2	1	2005	3-6	0	2.4	0.971267	1.04	0.420882	180	1	6	0	2	510.5	8.4	155.4	23.7	112	22.3	43.4	25	43.2	173.7
0	FONE	2	1	2005	3-6	0	2.4	0.971267	1.04	0.420882	180	1	6	0	2	510.5	8.4	155.4	23.7	112	22.3	43.4	25	43.2	173.7
0	FONE	2	1	2005	3-6	0	2.4	0.971267	1.04	0.420882	180	1	6	0	2	510.5	8.4	155.4	23.7	112	22.3	43.4	25	43.2	173.7
0	FONE	2	1	2005	3-6	0	2.4	0.971267	1.04	0.420882	180	1	6	0	2	510.5	8.4	155.4	23.7	112	22.3	43.4	25	43.2	173.7
0	FONE	2	1	2005	3-6	0	2.4	0.971267	1.04	0.420882	180	1	6	0	2	510.5	8.4	155.4	23.7	112	22.3	43.4	25	43.2	173.7
0	FONE	2	1	2005	7-10	1	0	0	1.04	0.420882	180	2	5	2	1	510.5	8.4	155.4	23.7	112	22.3	43.4	25	43.2	173.7
0	FONE	2	1	2005	7-10	1	0	0	1.04	0.420882	180	2	5	2	1	510.5	8.4	155.4	23.7	112	22.3	43.4	25	43.2	173.7
0	FONE	2	1	2005	7-10	1	0	0	1.04	0.420882	180	2	5	2	1	510.5	8.4	155.4	23.7	112	22.3	43.4	25	43.2	173.7
0	FONE	2	1	2006	3-6	7	0	0	0.72	0.29138	180	13	3	0	3	379.7	9.3	152.7	24.1	91.4	22.9	61.2	25.3	112	155.4
0	FONE	2	1	2006	3-6	7	0	0	0.72	0.29138	180	13	3	0	3	379.7	9.3	152.7	24.1	91.4	22.9	61.2	25.3	112	155.4
0	FONE	2	1	2006	3-6	7	0	0	0.72	0.29138	180	13	3	0	3	379.7	9.3	152.7	24.1	91.4	22.9	61.2	25.3	112	155.4
0	FONE	2	1	2006	3-6	7	0	0	0.72	0.29138	180	13	3	0	3	379.7	9.3	152.7	24.1	91.4	22.9	61.2	25.3	112	155.4
0	FONE	2	1	2006	3-6	7	0	0	0.72	0.29138	180	13	3	0	3	379.7	9.3	152.7	24.1	91.4	22.9	61.2	25.3	112	155.4
0	FONE	2	1	2006	3-6	7	0	0	0.72	0.29138	180	13	3	0	3	379.7	9.3	152.7	24.1	91.4	22.9	61.2	25.3	112	155.4
0	FONE	2	1	2006	3-6	7	0	0	0.72	0.29138	180	13	3	0	3	379.7	9.3	152.7	24.1	91.4	22.9	61.2	25.3	112	155.4
0	FONE	2	1	2006	3-6	7	0	0	0.72	0.29138	180	13	3	0	3	379.7	9.3	152.7	24.1	91.4	22.9	61.2	25.3	112	155.4
0	FONE	2	1	2006	3-6	7	0	0	0.72	0.29138	180	13	3	0	3	379.7	9.3	152.7	24.1	91.4	22.9	61.2	25.3	112	155.4
0	FONE	2	1	2006	3-6	7	0	0	0.72	0.29138	180	13	3	0	3	379.7	9.3	152.7	24.1	91.4	22.9	61.2	25.3	112	155.4
0	FONE	2	1	2006	3-6	7	0	0	0.72	0.29138	180	13	3	0	3	379.7	9.3	152.7	24.1	91.4	22.9	61.2	25.3	112	155.4
0	FONE	2	1	2006	3-6	7	0	0	0.72	0.29138	180	13	3	0	3	379.7	9.3	152.7	24.1	91.4	22.9	61.2	25.3	112	155.4
0	FONE	2	1	2006	3-6	7	0	0	0.72	0.29138	180	13	3	0	3	379.7	9.3	152.7	24.1	91.4	22.9	61.2	25.3	112	155.4
0	FONE	2	1	2006	3-6	7	0	0	0.72	0.29138	180	13	3	0	3	379.7	9.3	152.7	24.1	91.4	22.9	61.2	25.3	112	155.4
0	FONE	2	1	2006	3-6	7	0	0	0.72	0.29138	180	13	3	0	3	379.7	9.3	152.7	24.1	91.4	22.9	61.2	25.3	112	155.4
0	FONE	2	1	2006	3-6	7	0	0	0.72	0.29138	180	13	3	0	3	379.7	9.3	152.7	24.1	91.4	22.9	61.2	25.3	112	155.4
0	FONE	2	1	2006	3-6	7	0	0	0.72	0.29138	180	13	3	0	3	379.7	9.3	152.7	24.1	91.4	22.9	61.2	25.3	112	155.4
0	FONE	2	1	2006	3-6	7	0	0	0.72	0.29138	180	13	3	0	3	379.7	9.3	152.7	24.1	91.4	22.9	61.2	25.3	112	155.4
0	FONE	2	1	2006	3-6	7	0	0	0.72	0.29138	180	13	3	0	3	379.7	9.3	152.7	24.1	91.4	22.9	61.2	25.3	112	155.4
0	FONE	2	1	2006	3-6	7	0	0	0.72	0.29138	180	13	3	0	3	379.7	9.3	152.7	24.1	91.4	22.9	61.2	25.3	112	155.4
0	FONE	2	1	2006	3-6	7	0	0	0.72	0.29138	180	13	3	0	3	379.7	9.3	152.7	24.1	91.4	22.9	61.2	25.3	112	155.4
0	FONE	2	1	2006	3-6	7	0	0	0.72	0.29138	180	13	3	0	3	379.7	9.3	152.7	24.1	91.4	22.9	61.2	25.3	112	155.4
0	FONE	2	1	2006	3-6	7	0	0	0.72	0.29138	180	13	3	0	3	379.7	9.3	152.7	24.1	91.4	22.9	61.2	25.3	112	155.4
0	FONE	2	1	2006	3-6	7	0	0	0.72	0.29138	180	13	3	0	3	379.7	9.3	152.7	24.1	91.4	22.9	61.2	25.3	112	155.4
0	FONE	2	1	2006	3-6	7	0	0	0.72	0.29138	180	13	3	0	3	379.7	9.3	152.7	24.1	91.4	22.9	61.2	25.3	112	155.4
0	FONE	2	1	2006	7-10	0	1.2	0.485633	0.96	0.388507	180	14	3	1	1	379.7	9.3	152.7	24.1	91.4	22.9	61.2	25.3	112	155.4
0	FONE	2	1	2006	7-10	0	1.2	0.485633	0.96	0.388507	180	14	3	1	1	379.7	9.3	152.7	24.1	91.4	22.9	61.2	25.3	112	155.4
0	FONE	2	1	2006	7-10	0	1.2	0.485633	0.96	0.388507	180	14	3	1	1	379.7	9.3	152.7	24.1	91.4	22.9	61.2	25.3	112	155.4
0	FONE	2	1	2006	7-10	0	1.2	0.485633	0.96	0.388507	180	14	3	1	1	379.7	9.3	152.7	24.1	91.4	22.9	61.2	25.3	112	155.4
0	FONE	2	1	2006	7-10	0	1.2	0.485633	0.96	0.388507	180	14	3	1	1	379.7	9.3	152.7	24.1	91.4	22.9	61.2	25.3	112	155.4
0	FONE	2	1	2006	7-10	0	1.2	0.485633	0.96	0.388507	180	14	3	1	1	379.7	9.3	152.7	24.1	91.4	22.9	61.2	25.3	112	155.4
0	FONE	2	1	2006	7-10	0	1.2	0.485633	0.96	0.388507	180	14	3	1	1	379.7	9.3	152.7	24.1	91.4	22.9	61.2	25.3	112	155.4
0	FONE	2	1	2006	7-10	0	1.2	0.485633	0.96	0.388507	180	14	3	1	1	379.7	9.3	152.7	24.1	91.4	22.9	61.2	25.3	112	155.4
0	FONE	2	1	2006	7-10	0	1.2	0.485633	0.96	0.388507	180	14	3	1	1	379.7	9.3	152.7	24.1	91.4	22.9	61.2	25.3	112	155.4
0	FONE	2	1	2006	7-10	0	1.2	0.485633	0.96	0.388507	180	14	3	1	1	379.7	9.3	152.7	24.1	91.4	22.9	61.2	25.3	112	155.4
0	FONE	2	1	2006	7-10	0	1.2	0.485633	0.96	0.388507	180	14	3	1	1	379.7	9.3	152.7	24.1	91.4	22.9	61.2	25.3	112	155.4
0	FONE	2	1	2006	7-10	0	1.2	0.485633	0.96	0.388507	180	14	3	1	1	379.7	9.3	152.7	24.1	91.4	22.9	61.2	25.3	112	155.4
1	FONE	2	1	2006	7-10	0	1.2	0.485633	0.96	0.388507	180	14	3	1	1	379.7	9.3	152.7	24.1	91.4	22.9	61.2	25.3	112	155.4
1	FONE	2	1	2006	7-10	0	1.2	0.485633	0.96	0.388507	180	14	3	1	1	379.7	9.3	152.7	24.1	91.4	22.9	61.2	25.3	112	155.4
1	FONE	2	1	2006	7-10	0	1.2	0.485633	0.96	0.388507	180	14	3	1	1	379.7	9.3	152.7	24.1	91.4	22.9	61.2	25.3	112	155.4
1	FONE	2	1	2006	7-10	0	1.2	0.485633	0.96	0.388507	180	14	3	1	1	379.7	9.3	152.7	24.1	91.4	22.9	61.2	25.3	112	155.4
0	FONE	2	1	2007	3-6	9	0	0	0.72	0.29138	180	25	9	1	3	709.7	7.6	182.4	23	72.6	21.4	109.7	24.6	91.4	152.7
0	FONE	2	1	2007	3-6	9	0	0	0.72	0.29138	180	25	9	1	3	709.7	7.6	182.4	23	72.6	21.4	109.7	24.6	91.4	152.7
0	FONE	2	1	2007	3-6	9	0	0	0.72	0.29138	180	25	9	1	3	709.7	7.6	182.4	23	72.6	21.4	109.7	24.6	91.4	152.7
0	FONE	2	1	2007	3-6	9	0	0	0.72	0.29138	180	25	9	1	3	709.7	7.6	182.4	23	72.6	21.4	109.7	24.6	91.4	152.7
0	FONE	2	1	2007	3-6	9	0	0	0.72	0.29138	180	25	9	1	3	709.7	7.6	182.4	23	72.6	21.4	109.7	24.6	91.4	152.7
0	FONE	2	1	2007	3-6	9	0	0	0.72	0.29138	180	25	9	1	3	709.7	7.6	182.4	23	72.6	21.4	109.7	24.6	91.4	152.7
0	FONE	2	1	2007	3-6	9	0	0	0.72	0.29138	180	25	9	1	3	709.7	7.6	182.4	23	72.6	21.4	109.7	24.6	91.4	152.7
0	FONE	2	1	2007	3-6	9	0	0	0.72	0.29138	180	25	9	1	3	709.7	7.6	182.4	23	72.6	21.4	109.7	24.6	91.4	152.7
0	FONE	2	1	2007	3-6	9	0	0	0.72	0.29138	180	25	9	1	3	709.7	7.6	182.4	23	72.6	21.4	109.7	24.6	91.4	152.7
0	FONE	2	1	2007	3-6	9	0	0	0.72	0.29138	180	25	9	1	3	709.7	7.6	182.4	23	72.6	21.4	109.7	24.6	91.4	152.7
0	FONE	2	1	2007	3-6	9	0	0	0.72	0.29138	180	25	9	1	3	709.7	7.6	182.4	23	72.6	21.4	109.7	24.6	91.4	152.7
0	FONE	2	1	2007	3-6	9	0	0	0.72	0.29138	180	25	9	1	3	709.7	7.6	182.4	23	72.6	21.4	109.7	24.6	91.4	152.7
0	FONE	2	1	2007	7-10	10	0	0	0.72	0.29138	180	26	8	4	2	709.7	7.6	182.4	23	72.6	21.4	109.7	24.6	91.4	152.7
0	FONE	2	1	2007	7-10	10	0	0	0.72	0.29138	180	26	8	4	2	709.7	7.6	182.4	23	72.6	21.4	109.7	24.6	91.4	152.7
0	FONE	2	1	2007	7-10	10	0	0	0.72	0.29138	180	26	8	4	2	709.7	7.6	182.4	23	72.6	21.4	109.7	24.6	91.4	152.7
0	FONE	2	1	2007	7-10	10	0	0	0.72	0.29138	180	26	8	4	2	709.7	7.6	182.4	23	72.6	21.4	109.7	24.6	91.4	152.7
0	FONE	2	1	2007	7-10	10	0	0	0.72	0.29138	180	26	8	4	2	709.7	7.6	182.4	23	72.6	21.4	109.7	24.6	91.4	152.7
0	FONE	2	1	2007	7-10	10	0	0	0.72	0.29138	180	26	8	4	2	709.7	7.6	182.4	23	72.6	21.4	109.7	24.6	91.4	152.7
0	FONE	2	1	2007	7-10	10	0	0	0.72	0.29138	180	26	8	4	2	709.7	7.6	182.4	23	72.6	21.4	109.7	24.6	91.4	152.7
0	FONE	2	1	2007	7-10	10	0	0	0.72	0.29138	180	26	8	4	2	709.7	7.6	182.4	23	72.6	21.4	109.7	24.6	91.4	152.7
0	FONE	2	1	2007	7-10	10	0	0	0.72	0.29138	180	26	8	4	2	709.7	7.6	182.4	23	72.6	21.4	109.7	24.6	91.4	152.7
0	FONE	2	1	2007	7-10	10	0	0	0.72	0.29138	180	26	8	4	2	709.7	7.6	182.4	23	72.6	21.4	109.7	24.6	91.4	152.7
1	FONE	2	1	2007	7-10	10	0	0	0.72	0.29138	180	26	8	4	2	709.7	7.6	182.4	23	72.6	21.4	109.7	24.6	91.4	152.7
1	FONE	2	1	2007	7-10	10	0	0	0.72	0.29138	180	26	8	4	2	709.7	7.6	182.4	23	72.6	21.4	109.7	24.6	91.4	152.7
1	FONE	2	1	2007	7-10	10	0	0	0.72	0.29138	180	26	8	4	2	709.7	7.6	182.4	23	72.6	21.4	109.7	24.6	91.4	152.7
1	FONE	2	1	2007	7-10	10	0	0	0.72	0.29138	180	26	8	4	2	709.7	7.6	182.4	23	72.6	21.4	109.7	24.6	91.4	152.7
1	FONE	2	1	2007	7-10	10	0	0	0.72	0.29138	180	26	8	4	2	709.7	7.6	182.4	23	72.6	21.4	109.7	24.6	91.4	152.7
0	MOFE	2	1	2002	3-6	180	0	0	0	0	10	25	0	0	0	369.8	8.5	56.1	25.3	34.5	24.5	21.6	26.2	27.2	104.6
0	MOFE	2	1	2002	3-6	180	0	0	0	0	10	25	0	0	0	369.8	8.5	56.1	25.3	34.5	24.5	21.6	26.2	27.2	104.6
0	MOFE	2	1	2002	3-6	180	0	0	0	0	10	25	0	0	0	369.8	8.5	56.1	25.3	34.5	24.5	21.6	26.2	27.2	104.6
0	MOFE	2	1	2002	3-6	180	0	0	0	0	10	25	0	0	0	369.8	8.5	56.1	25.3	34.5	24.5	21.6	26.2	27.2	104.6
0	MOFE	2	1	2002	3-6	180	0	0	0	0	10	25	0	0	0	369.8	8.5	56.1	25.3	34.5	24.5	21.6	26.2	27.2	104.6
0	MOFE	2	1	2002	3-6	180	0	0	0	0	10	25	0	0	0	369.8	8.5	56.1	25.3	34.5	24.5	21.6	26.2	27.2	104.6
0	MOFE	2	1	2002	3-6	180	0	0	0	0	10	25	0	0	0	369.8	8.5	56.1	25.3	34.5	24.5	21.6	26.2	27.2	104.6
0	MOFE	2	1	2002	3-6	180	0	0	0	0	10	25	0	0	0	369.8	8.5	56.1	25.3	34.5	24.5	21.6	26.2	27.2	104.6
0	MOFE	2	1	2002	3-6	180	0	0	0	0	10	25	0	0	0	369.8	8.5	56.1	25.3	34.5	24.5	21.6	26.2	27.2	104.6
0	MOFE	2	1	2002	3-6	180	0	0	0	0	10	25	0	0	0	369.8	8.5	56.1	25.3	34.5	24.5	21.6	26.2	27.2	104.6
0	MOFE	2	1	2002	3-6	180	0	0	0	0	10	25	0	0	0	369.8	8.5	56.1	25.3	34.5	24.5	21.6	26.2	27.2	104.6
0	MOFE	2	1	2002	3-6	180	0	0	0	0	10	25	0	0	0	369.8	8.5	56.1	25.3	34.5	24.5	21.6	26.2	27.2	104.6
0	MOFE	2	1	2002	3-6	180	0	0	0	0	10	25	0	0	0	369.8	8.5	56.1	25.3	34.5	24.5	21.6	26.2	27.2	104.6
0	MOFE	2	1	2002	3-6	180	0	0	0	0	10	25	0	0	0	369.8	8.5	56.1	25.3	34.5	24.5	21.6	26.2	27.2	104.6
0	MOFE	2	1	2002	3-6	180	0	0	0	0	10	25	0	0	0	369.8	8.5	56.1	25.3	34.5	24.5	21.6	26.2	27.2	104.6
0	MOFE	2	1	2002	3-6	180	0	0	0	0	10	25	0	0	0	369.8	8.5	56.1	25.3	34.5	24.5	21.6	26.2	27.2	104.6
0	MOFE	2	1	2002	3-6	180	0	0	0	0	10	25	0	0	0	369.8	8.5	56.1	25.3	34.5	24.5	21.6	26.2	27.2	104.6
0	MOFE	2	1	2002	3-6	180	0	0	0	0	10	25	0	0	0	369.8	8.5	56.1	25.3	34.5	24.5	21.6	26.2	27.2	104.6
0	MOFE	2	1	2002	3-6	180	0	0	0	0	10	25	0	0	0	369.8	8.5	56.1	25.3	34.5	24.5	21.6	26.2	27.2	104.6
0	MOFE	2	1	2002	3-6	180	0	0	0	0	10	25	0	0	0	369.8	8.5	56.1	25.3	34.5	24.5	21.6	26.2	27.2	104.6
0	MOFE	2	1	2002	3-6	180	0	0	0	0	10	25	0	0	0	369.8	8.5	56.1	25.3	34.5	24.5	21.6	26.2	27.2	104.6
0	MOFE	2	1	2002	3-6	180	0	0	0	0	10	25	0	0	0	369.8	8.5	56.1	25.3	34.5	24.5	21.6	26.2	27.2	104.6
0	MOFE	2	1	2002	3-6	180	0	0	0	0	10	25	0	0	0	369.8	8.5	56.1	25.3	34.5	24.5	21.6	26.2	27.2	104.6
0	MOFE	2	1	2002	3-6	180	0	0	0	0	10	25	0	0	0	369.8	8.5	56.1	25.3	34.5	24.5	21.6	26.2	27.2	104.6
0	MOFE	2	1	2002	3-6	180	0	0	0	0	10	25	0	0	0	369.8	8.5	56.1	25.3	34.5	24.5	21.6	26.2	27.2	104.6
0	MOFE	2	1	2002	3-6	180	0	0	0	0	10	25	0	0	0	369.8	8.5	56.1	25.3	34.5	24.5	21.6	26.2	27.2	104.6
0	MOFE	2	1	2002	3-6	180	0	0	0	0	10	25	0	0	0	369.8	8.5	56.1	25.3	34.5	24.5	21.6	26.2	27.2	104.6
0	MOFE	2	1	2002	3-6	180	0	0	0	0	10	25	0	0	0	369.8	8.5	56.1	25.3	34.5	24.5	21.6	26.2	27.2	104.6
0	MOFE	2	1	2002	3-6	180	0	0	0	0	10	25	0	0	0	369.8	8.5	56.1	25.3	34.5	24.5	21.6	26.2	27.2	104.6
0	MOFE	2	1	2002	3-6	180	0	0	0	0	10	25	0	0	0	369.8	8.5	56.1	25.3	34.5	24.5	21.6	26.2	27.2	104.6
0	MOFE	2	1	2002	3-6	180	0	0	0	0	10	25	0	0	0	369.8	8.5	56.1	25.3	34.5	24.5	21.6	26.2	27.2	104.6
0	MOFE	2	1	2002	3-6	180	0	0	0	0	10	25	0	0	0	369.8	8.5	56.1	25.3	34.5	24.5	21.6	26.2	27.2	104.6
0	MOFE	2	1	2002	3-6	180	0	0	0	0	10	25	0	0	0	369.8	8.5	56.1	25.3	34.5	24.5	21.6	26.2	27.2	104.6
0	MOFE	2	1	2002	3-6	180	0	0	0	0	10	25	0	0	0	369.8	8.5	56.1	25.3	34.5	24.5	21.6	26.2	27.2	104.6
0	MOFE	2	1	2002	3-6	180	0	0	0	0	10	25	0	0	0	369.8	8.5	56.1	25.3	34.5	24.5	21.6	26.2	27.2	104.6
0	MOFE	2	1	2002	3-6	180	0	0	0	0	10	25	0	0	0	369.8	8.5	56.1	25.3	34.5	24.5	21.6	26.2	27.2	104.6
0	MOFE	2	1	2002	3-6	180	0	0	0	0	10	25	0	0	0	369.8	8.5	56.1	25.3	34.5	24.5	21.6	26.2	27.2	104.6
0	MOFE	2	1	2002	3-6	180	0	0	0	0	10	25	0	0	0	369.8	8.5	56.1	25.3	34.5	24.5	21.6	26.2	27.2	104.6
0	MOFE	2	1	2002	3-6	180	0	0	0	0	10	25	0	0	0	369.8	8.5	56.1	25.3	34.5	24.5	21.6	26.2	27.2	104.6
0	MOFE	2	1	2002	3-6	180	0	0	0	0	10	25	0	0	0	369.8	8.5	56.1	25.3	34.5	24.5	21.6	26.2	27.2	104.6
0	MOFE	2	1	2002	3-6	180	0	0	0	0	10	25	0	0	0	369.8	8.5	56.1	25.3	34.5	24.5	21.6	26.2	27.2	104.6
0	MOFE	2	1	2002	3-6	180	0	0	0	0	10	25	0	0	0	369.8	8.5	56.1	25.3	34.5	24.5	21.6	26.2	27.2	104.6
0	MOFE	2	1	2002	7-10	180	0	0	0	0	11	26	0	0	0	369.8	8.5	56.1	25.3	34.5	24.5	21.6	26.2	27.2	104.6
0	MOFE	2	1	2002	7-10	180	0	0	0	0	11	26	0	0	0	369.8	8.5	56.1	25.3	34.5	24.5	21.6	26.2	27.2	104.6
0	MOFE	2	1	2003	3-6	180	0	0	0	0	10	37	7	0	2	480.1	7.8	124.2	22.6	111.3	20.1	13	25.2	34.5	56.1
0	MOFE	2	1	2003	3-6	180	0	0	0	0	10	37	7	0	2	480.1	7.8	124.2	22.6	111.3	20.1	13	25.2	34.5	56.1
0	MOFE	2	1	2003	3-6	180	0	0	0	0	10	37	7	0	2	480.1	7.8	124.2	22.6	111.3	20.1	13	25.2	34.5	56.1
0	MOFE	2	1	2003	3-6	180	0	0	0	0	10	37	7	0	2	480.1	7.8	124.2	22.6	111.3	20.1	13	25.2	34.5	56.1
0	MOFE	2	1	2003	3-6	180	0	0	0	0	10	37	7	0	2	480.1	7.8	124.2	22.6	111.3	20.1	13	25.2	34.5	56.1
0	MOFE	2	1	2003	3-6	180	0	0	0	0	10	37	7	0	2	480.1	7.8	124.2	22.6	111.3	20.1	13	25.2	34.5	56.1
0	MOFE	2	1	2003	3-6	180	0	0	0	0	10	37	7	0	2	480.1	7.8	124.2	22.6	111.3	20.1	13	25.2	34.5	56.1
0	MOFE	2	1	2003	3-6	180	0	0	0	0	10	37	7	0	2	480.1	7.8	124.2	22.6	111.3	20.1	13	25.2	34.5	56.1
0	MOFE	2	1	2003	3-6	180	0	0	0	0	10	37	7	0	2	480.1	7.8	124.2	22.6	111.3	20.1	13	25.2	34.5	56.1
0	MOFE	2	1	2003	3-6	180	0	0	0	0	10	37	7	0	2	480.1	7.8	124.2	22.6	111.3	20.1	13	25.2	34.5	56.1
0	MOFE	2	1	2003	3-6	180	0	0	0	0	10	37	7	0	2	480.1	7.8	124.2	22.6	111.3	20.1	13	25.2	34.5	56.1
0	MOFE	2	1	2003	3-6	180	0	0	0	0	10	37	7	0	2	480.1	7.8	124.2	22.6	111.3	20.1	13	25.2	34.5	56.1
0	MOFE	2	1	2003	3-6	180	0	0	0	0	10	37	7	0	2	480.1	7.8	124.2	22.6	111.3	20.1	13	25.2	34.5	56.1
0	MOFE	2	1	2003	7-10	180	0	0	0	0	11	38	2	0	0	480.1	7.8	124.2	22.6	111.3	20.1	13	25.2	34.5	56.1
0	MOFE	2	1	2003	7-10	180	0	0	0	0	11	38	2	0	0	480.1	7.8	124.2	22.6	111.3	20.1	13	25.2	34.5	56.1
0	MOFE	2	1	2003	7-10	180	0	0	0	0	11	38	2	0	0	480.1	7.8	124.2	22.6	111.3	20.1	13	25.2	34.5	56.1
0	MOFE	2	1	2003	7-10	180	0	0	0	0	11	38	2	0	0	480.1	7.8	124.2	22.6	111.3	20.1	13	25.2	34.5	56.1
0	MOFE	2	1	2003	7-10	180	0	0	0	0	11	38	2	0	0	480.1	7.8	124.2	22.6	111.3	20.1	13	25.2	34.5	56.1
0	MOFE	2	1	2003	7-10	180	0	0	0	0	11	38	2	0	0	480.1	7.8	124.2	22.6	111.3	20.1	13	25.2	34.5	56.1
0	MOFE	2	1	2003	7-10	180	0	0	0	0	11	38	2	0	0	480.1	7.8	124.2	22.6	111.3	20.1	13	25.2	34.5	56.1
0	MOFE	2	1	2003	7-10	180	0	0	0	0	11	38	2	0	0	480.1	7.8	124.2	22.6	111.3	20.1	13	25.2	34.5	56.1
0	MOFE	2	1	2003	7-10	180	0	0	0	0	11	38	2	0	0	480.1	7.8	124.2	22.6	111.3	20.1	13	25.2	34.5	56.1
0	MOFE	2	1	2003	7-10	180	0	0	0	0	11	38	2	0	0	480.1	7.8	124.2	22.6	111.3	20.1	13	25.2	34.5	56.1
0	MOFE	2	1	2004	3-6	180	0	0	0	0	22	49	5	1	1	378	8.2	173.7	20.9	43.2	19.7	130.6	22.2	111.3	124.2
0	MOFE	2	1	2004	3-6	180	0	0	0	0	22	49	5	1	1	378	8.2	173.7	20.9	43.2	19.7	130.6	22.2	111.3	124.2
0	MOFE	2	1	2004	3-6	180	0	0	0	0	22	49	5	1	1	378	8.2	173.7	20.9	43.2	19.7	130.6	22.2	111.3	124.2
0	MOFE	2	1	2004	3-6	180	0	0	0	0	22	49	5	1	1	378	8.2	173.7	20.9	43.2	19.7	130.6	22.2	111.3	124.2
0	MOFE	2	1	2004	3-6	180	0	0	0	0	22	49	5	1	1	378	8.2	173.7	20.9	43.2	19.7	130.6	22.2	111.3	124.2
0	MOFE	2	1	2004	3-6	180	0	0	0	0	22	49	5	1	1	378	8.2	173.7	20.9	43.2	19.7	130.6	22.2	111.3	124.2
0	MOFE	2	1	2004	3-6	180	0	0	0	0	22	49	5	1	1	378	8.2	173.7	20.9	43.2	19.7	130.6	22.2	111.3	124.2
0	MOFE	2	1	2004	3-6	180	0	0	0	0	22	49	5	1	1	378	8.2	173.7	20.9	43.2	19.7	130.6	22.2	111.3	124.2
0	MOFE	2	1	2004	3-6	180	0	0	0	0	22	49	5	1	1	378	8.2	173.7	20.9	43.2	19.7	130.6	22.2	111.3	124.2
0	MOFE	2	1	2004	3-6	180	0	0	0	0	22	49	5	1	1	378	8.2	173.7	20.9	43.2	19.7	130.6	22.2	111.3	124.2
0	MOFE	2	1	2004	3-6	180	0	0	0	0	22	49	5	1	1	378	8.2	173.7	20.9	43.2	19.7	130.6	22.2	111.3	124.2
0	MOFE	2	1	2004	3-6	180	0	0	0	0	22	49	5	1	1	378	8.2	173.7	20.9	43.2	19.7	130.6	22.2	111.3	124.2
0	MOFE	2	1	2004	3-6	180	0	0	0	0	22	49	5	1	1	378	8.2	173.7	20.9	43.2	19.7	130.6	22.2	111.3	124.2
0	MOFE	2	1	2004	3-6	180	0	0	0	0	22	49	5	1	1	378	8.2	173.7	20.9	43.2	19.7	130.6	22.2	111.3	124.2
0	MOFE	2	1	2004	7-10	180	0	0	0	0	23	50	2	0	1	378	8.2	173.7	20.9	43.2	19.7	130.6	22.2	111.3	124.2
0	MOFE	2	1	2004	7-10	180	0	0	0	0	23	50	2	0	1	378	8.2	173.7	20.9	43.2	19.7	130.6	22.2	111.3	124.2
0	MOFE	2	1	2004	7-10	180	0	0	0	0	23	50	2	0	1	378	8.2	173.7	20.9	43.2	19.7	130.6	22.2	111.3	124.2
0	MOFE	2	1	2004	7-10	180	0	0	0	0	23	50	2	0	1	378	8.2	173.7	20.9	43.2	19.7	130.6	22.2	111.3	124.2
0	MOFE	2	1	2004	7-10	180	0	0	0	0	23	50	2	0	1	378	8.2	173.7	20.9	43.2	19.7	130.6	22.2	111.3	124.2
0	MOFE	2	1	2004	7-10	180	0	0	0	0	23	50	2	0	1	378	8.2	173.7	20.9	43.2	19.7	130.6	22.2	111.3	124.2
0	MOFE	2	1	2005	3-6	180	0	0	0	0	34	61	1	0	1	510.5	8.4	155.4	23.7	112	22.3	43.4	25	43.2	173.7
0	MOFE	2	1	2005	3-6	180	0	0	0	0	34	61	1	0	1	510.5	8.4	155.4	23.7	112	22.3	43.4	25	43.2	173.7
0	MOFE	2	1	2006	3-6	180	0	0	0	0	46	1	1	0	1	379.7	9.3	152.7	24.1	91.4	22.9	61.2	25.3	112	155.4
0	MOFE	2	1	2006	3-6	180	0	0	0	0	46	1	1	0	1	379.7	9.3	152.7	24.1	91.4	22.9	61.2	25.3	112	155.4
0	MOFE	2	1	2006	3-6	180	0	0	0	0	46	1	1	0	1	379.7	9.3	152.7	24.1	91.4	22.9	61.2	25.3	112	155.4
0	MOFE	2	1	2006	3-6	180	0	0	0	0	46	1	1	0	1	379.7	9.3	152.7	24.1	91.4	22.9	61.2	25.3	112	155.4
0	MOFE	2	1	2006	3-6	180	0	0	0	0	46	1	1	0	1	379.7	9.3	152.7	24.1	91.4	22.9	61.2	25.3	112	155.4
0	MOFE	2	1	2006	3-6	180	0	0	0	0	46	1	1	0	1	379.7	9.3	152.7	24.1	91.4	22.9	61.2	25.3	112	155.4
0	MOFE	2	1	2006	3-6	180	0	0	0	0	46	1	1	0	1	379.7	9.3	152.7	24.1	91.4	22.9	61.2	25.3	112	155.4
0	MOFE	2	1	2006	3-6	180	0	0	0	0	46	1	1	0	1	379.7	9.3	152.7	24.1	91.4	22.9	61.2	25.3	112	155.4
0	MOFE	2	1	2006	3-6	180	0	0	0	0	46	1	1	0	1	379.7	9.3	152.7	24.1	91.4	22.9	61.2	25.3	112	155.4
0	MOFE	2	1	2006	7-10	180	0	0	0	0	47	2	1	0	1	379.7	9.3	152.7	24.1	91.4	22.9	61.2	25.3	112	155.4
0	MOFE	2	1	2006	7-10	180	0	0	0	0	47	2	1	0	1	379.7	9.3	152.7	24.1	91.4	22.9	61.2	25.3	112	155.4
0	MOFE	2	1	2006	7-10	180	0	0	0	0	47	2	1	0	1	379.7	9.3	152.7	24.1	91.4	22.9	61.2	25.3	112	155.4
0	MOFE	2	1	2006	7-10	180	0	0	0	0	47	2	1	0	1	379.7	9.3	152.7	24.1	91.4	22.9	61.2	25.3	112	155.4
1	MOFE	2	1	2006	7-10	180	0	0	0	0	47	2	1	0	1	379.7	9.3	152.7	24.1	91.4	22.9	61.2	25.3	112	155.4
1	MOFE	2	1	2006	7-10	180	0	0	0	0	47	2	1	0	1	379.7	9.3	152.7	24.1	91.4	22.9	61.2	25.3	112	155.4
0	MOFE	2	1	2007	3-6	180	0	0	0	0	58	13	17	0	10	709.7	7.6	182.4	23	72.6	21.4	109.7	24.6	91.4	152.7
0	MOFE	2	1	2007	3-6	180	0	0	0	0	58	13	17	0	10	709.7	7.6	182.4	23	72.6	21.4	109.7	24.6	91.4	152.7
0	MOFE	2	1	2007	3-6	180	0	0	0	0	58	13	17	0	10	709.7	7.6	182.4	23	72.6	21.4	109.7	24.6	91.4	152.7
0	MOFE	2	1	2007	3-6	180	0	0	0	0	58	13	17	0	10	709.7	7.6	182.4	23	72.6	21.4	109.7	24.6	91.4	152.7
0	MOFE	2	1	2007	3-6	180	0	0	0	0	58	13	17	0	10	709.7	7.6	182.4	23	72.6	21.4	109.7	24.6	91.4	152.7
0	MOFE	2	1	2007	3-6	180	0	0	0	0	58	13	17	0	10	709.7	7.6	182.4	23	72.6	21.4	109.7	24.6	91.4	152.7
0	MOFE	2	1	2007	3-6	180	0	0	0	0	58	13	17	0	10	709.7	7.6	182.4	23	72.6	21.4	109.7	24.6	91.4	152.7
0	MOFE	2	1	2007	3-6	180	0	0	0	0	58	13	17	0	10	709.7	7.6	182.4	23	72.6	21.4	109.7	24.6	91.4	152.7
0	MOFE	2	1	2007	3-6	180	0	0	0	0	58	13	17	0	10	709.7	7.6	182.4	23	72.6	21.4	109.7	24.6	91.4	152.7
0	MOFE	2	1	2007	3-6	180	0	0	0	0	58	13	17	0	10	709.7	7.6	182.4	23	72.6	21.4	109.7	24.6	91.4	152.7
0	MOFE	2	1	2007	3-6	180	0	0	0	0	58	13	17	0	10	709.7	7.6	182.4	23	72.6	21.4	109.7	24.6	91.4	152.7
0	MOFE	2	1	2007	3-6	180	0	0	0	0	58	13	17	0	10	709.7	7.6	182.4	23	72.6	21.4	109.7	24.6	91.4	152.7
0	MOFE	2	1	2007	3-6	180	0	0	0	0	58	13	17	0	10	709.7	7.6	182.4	23	72.6	21.4	109.7	24.6	91.4	152.7
0	MOFE	2	1	2007	3-6	180	0	0	0	0	58	13	17	0	10	709.7	7.6	182.4	23	72.6	21.4	109.7	24.6	91.4	152.7
0	MOFE	2	1	2007	3-6	180	0	0	0	0	58	13	17	0	10	709.7	7.6	182.4	23	72.6	21.4	109.7	24.6	91.4	152.7
0	MOFE	2	1	2007	3-6	180	0	0	0	0	58	13	17	0	10	709.7	7.6	182.4	23	72.6	21.4	109.7	24.6	91.4	152.7
0	MOFE	2	1	2007	3-6	180	0	0	0	0	58	13	17	0	10	709.7	7.6	182.4	23	72.6	21.4	109.7	24.6	91.4	152.7
0	MOFE	2	1	2007	3-6	180	0	0	0	0	58	13	17	0	10	709.7	7.6	182.4	23	72.6	21.4	109.7	24.6	91.4	152.7
0	MOFE	2	1	2007	3-6	180	0	0	0	0	58	13	17	0	10	709.7	7.6	182.4	23	72.6	21.4	109.7	24.6	91.4	152.7
0	MOFE	2	1	2007	7-10	180	0	0	0	0	59	14	10	9	1	709.7	7.6	182.4	23	72.6	21.4	109.7	24.6	91.4	152.7
0	MOFE	2	1	2007	7-10	180	0	0	0	0	59	14	10	9	1	709.7	7.6	182.4	23	72.6	21.4	109.7	24.6	91.4	152.7
0	MOFE	2	1	2007	7-10	180	0	0	0	0	59	14	10	9	1	709.7	7.6	182.4	23	72.6	21.4	109.7	24.6	91.4	152.7
0	MOFE	2	1	2007	7-10	180	0	0	0	0	59	14	10	9	1	709.7	7.6	182.4	23	72.6	21.4	109.7	24.6	91.4	152.7
0	MOFE	2	1	2007	7-10	180	0	0	0	0	59	14	10	9	1	709.7	7.6	182.4	23	72.6	21.4	109.7	24.6	91.4	152.7
0	MOFE	2	1	2007	7-10	180	0	0	0	0	59	14	10	9	1	709.7	7.6	182.4	23	72.6	21.4	109.7	24.6	91.4	152.7
0	MOFE	2	1	2007	7-10	180	0	0	0	0	59	14	10	9	1	709.7	7.6	182.4	23	72.6	21.4	109.7	24.6	91.4	152.7
0	MOFE	2	1	2007	7-10	180	0	0	0	0	59	14	10	9	1	709.7	7.6	182.4	23	72.6	21.4	109.7	24.6	91.4	152.7
0	MOFE	2	1	2007	7-10	180	0	0	0	0	59	14	10	9	1	709.7	7.6	182.4	23	72.6	21.4	109.7	24.6	91.4	152.7
0	MOFE	2	1	2007	7-10	180	0	0	0	0	59	14	10	9	1	709.7	7.6	182.4	23	72.6	21.4	109.7	24.6	91.4	152.7
0	MOFE	2	1	2007	7-10	180	0	0	0	0	59	14	10	9	1	709.7	7.6	182.4	23	72.6	21.4	109.7	24.6	91.4	152.7
0	MOFE	2	1	2007	7-10	180	0	0	0	0	59	14	10	9	1	709.7	7.6	182.4	23	72.6	21.4	109.7	24.6	91.4	152.7
0	MOFE	2	1	2007	7-10	180	0	0	0	0	59	14	10	9	1	709.7	7.6	182.4	23	72.6	21.4	109.7	24.6	91.4	152.7
0	MOFE	2	1	2007	7-10	180	0	0	0	0	59	14	10	9	1	709.7	7.6	182.4	23	72.6	21.4	109.7	24.6	91.4	152.7
0	MOFE	2	1	2007	7-10	180	0	0	0	0	59	14	10	9	1	709.7	7.6	182.4	23	72.6	21.4	109.7	24.6	91.4	152.7
0	MOFE	2	1	2007	7-10	180	0	0	0	0	59	14	10	9	1	709.7	7.6	182.4	23	72.6	21.4	109.7	24.6	91.4	152.7
1	MOFE	2	1	2007	7-10	180	0	0	0	0	59	14	10	9	1	709.7	7.6	182.4	23	72.6	21.4	109.7	24.6	91.4	152.7
1	MOFE	2	1	2007	7-10	180	0	0	0	0	59	14	10	9	1	709.7	7.6	182.4	23	72.6	21.4	109.7	24.6	91.4	152.7
1	MOFE	2	1	2007	7-10	180	0	0	0	0	59	14	10	9	1	709.7	7.6	182.4	23	72.6	21.4	109.7	24.6	91.4	152.7
1	MOFE	2	1	2007	7-10	180	0	0	0	0	59	14	10	9	1	709.7	7.6	182.4	23	72.6	21.4	109.7	24.6	91.4	152.7
1	MOFE	2	1	2007	7-10	180	0	0	0	0	59	14	10	9	1	709.7	7.6	182.4	23	72.6	21.4	109.7	24.6	91.4	152.7
1	MOFE	2	1	2007	7-10	180	0	0	0	0	59	14	10	9	1	709.7	7.6	182.4	23	72.6	21.4	109.7	24.6	91.4	152.7
1	MOFE	2	1	2007	7-10	180	0	0	0	0	59	14	10	9	1	709.7	7.6	182.4	23	72.6	21.4	109.7	24.6	91.4	152.7
1	MOFE	2	1	2007	7-10	180	0	0	0	0	59	14	10	9	1	709.7	7.6	182.4	23	72.6	21.4	109.7	24.6	91.4	152.7
1	MOFE	2	1	2007	7-10	180	0	0	0	0	59	14	10	9	1	709.7	7.6	182.4	23	72.6	21.4	109.7	24.6	91.4	152.7
1	MOFE	2	1	2007	7-10	180	0	0	0	0	59	14	10	9	1	709.7	7.6	182.4	23	72.6	21.4	109.7	24.6	91.4	152.7
1	MOFE	2	1	2007	7-10	180	0	0	0	0	59	14	10	9	1	709.7	7.6	182.4	23	72.6	21.4	109.7	24.6	91.4	152.7
1	MOFE	2	1	2007	7-10	180	0	0	0	0	59	14	10	9	1	709.7	7.6	182.4	23	72.6	21.4	109.7	24.6	91.4	152.7
1	MOFE	2	1	2017	7-10	8	0	0	0.564	0.228248	180	50	5	2	3	444.2	9.1	127.3	24	48.3	22.9	79	25	16	124.2
0	MOFE	2	1	2018	3-6	0	0.88	0.356131	0.904	0.365844	180	61	2	0	0	570.5	7.3	223	23.7	124.7	24	98.3	23.4	48.3	127.3
0	MOFE	2	1	2018	3-6	0	0.88	0.356131	0.904	0.365844	180	61	2	0	0	570.5	7.3	223	23.7	124.7	24	98.3	23.4	48.3	127.3
0	MOFE	2	1	2018	3-6	0	0.88	0.356131	0.904	0.365844	180	61	2	0	0	570.5	7.3	223	23.7	124.7	24	98.3	23.4	48.3	127.3
0	MOFE	2	1	2018	7-10	0	0.46	0.186159	0.862	0.348847	180	62	1	1	0	570.5	7.3	223	23.7	124.7	24	98.3	23.4	48.3	127.3
1	MOFE	2	1	2018	7-10	0	0.46	0.186159	0.862	0.348847	180	62	1	1	0	570.5	7.3	223	23.7	124.7	24	98.3	23.4	48.3	127.3
0	MOFE	2	1	2019	3-6	0	0.48	0.194253	1.023	0.414002	180	73	0	0	0	702.1	6.5	252.2	22.7	114.3	21.2	137.9	24.3	124.7	223
0	MOFE	2	1	2019	3-6	0	0.48	0.194253	1.023	0.414002	180	73	0	0	0	702.1	6.5	252.2	22.7	114.3	21.2	137.9	24.3	124.7	223
0	MOFE	2	1	2019	7-10	1	0	0	1.023	0.414002	180	74	0	0	0	702.1	6.5	252.2	22.7	114.3	21.2	137.9	24.3	124.7	223
0	MOFE	2	1	2019	7-10	1	0	0	1.023	0.414002	180	74	0	0	0	702.1	6.5	252.2	22.7	114.3	21.2	137.9	24.3	124.7	223
0	MOFF	2.33	2	2002	3-6	23	0	0	0	0	180	26	0	0	0	369.8	8.5	56.1	25.3	34.5	24.5	21.6	26.2	27.2	104.6
0	MOFF	2.33	2	2002	3-6	23	0	0	0	0	180	26	0	0	0	369.8	8.5	56.1	25.3	34.5	24.5	21.6	26.2	27.2	104.6
0	MOFF	2.33	2	2002	3-6	23	0	0	0	0	180	26	0	0	0	369.8	8.5	56.1	25.3	34.5	24.5	21.6	26.2	27.2	104.6
0	MOFF	2.33	2	2002	3-6	23	0	0	0	0	180	26	0	0	0	369.8	8.5	56.1	25.3	34.5	24.5	21.6	26.2	27.2	104.6
0	MOFF	2.33	2	2002	3-6	23	0	0	0	0	180	26	0	0	0	369.8	8.5	56.1	25.3	34.5	24.5	21.6	26.2	27.2	104.6
0	MOFF	2.33	2	2002	3-6	23	0	0	0	0	180	26	0	0	0	369.8	8.5	56.1	25.3	34.5	24.5	21.6	26.2	27.2	104.6
0	MOFF	2.33	2	2002	7-10	24	0	0	0	0	180	27	0	0	0	369.8	8.5	56.1	25.3	34.5	24.5	21.6	26.2	27.2	104.6
0	MOFF	2.33	2	2002	7-10	24	0	0	0	0	180	27	0	0	0	369.8	8.5	56.1	25.3	34.5	24.5	21.6	26.2	27.2	104.6
0	MOFF	2.33	2	2002	7-10	24	0	0	0	0	180	27	0	0	0	369.8	8.5	56.1	25.3	34.5	24.5	21.6	26.2	27.2	104.6
0	MOFF	2.33	2	2002	7-10	24	0	0	0	0	180	27	0	0	0	369.8	8.5	56.1	25.3	34.5	24.5	21.6	26.2	27.2	104.6
0	MOFF	2.33	2	2004	3-6	0	2.6	1.05221	0.34	0.137596	180	50	6	0	2	378	8.2	173.7	20.9	43.2	19.7	130.6	22.2	111.3	124.2
0	MOFF	2.33	2	2004	3-6	0	2.6	1.05221	0.34	0.137596	180	50	6	0	2	378	8.2	173.7	20.9	43.2	19.7	130.6	22.2	111.3	124.2
0	MOFF	2.33	2	2004	3-6	0	2.6	1.05221	0.34	0.137596	180	50	6	0	2	378	8.2	173.7	20.9	43.2	19.7	130.6	22.2	111.3	124.2
0	MOFF	2.33	2	2004	3-6	0	2.6	1.05221	0.34	0.137596	180	50	6	0	2	378	8.2	173.7	20.9	43.2	19.7	130.6	22.2	111.3	124.2
0	MOFF	2.33	2	2004	3-6	0	2.6	1.05221	0.34	0.137596	180	50	6	0	2	378	8.2	173.7	20.9	43.2	19.7	130.6	22.2	111.3	124.2
0	MOFF	2.33	2	2004	3-6	0	2.6	1.05221	0.34	0.137596	180	50	6	0	2	378	8.2	173.7	20.9	43.2	19.7	130.6	22.2	111.3	124.2
0	MOFF	2.33	2	2004	3-6	0	2.6	1.05221	0.34	0.137596	180	50	6	0	2	378	8.2	173.7	20.9	43.2	19.7	130.6	22.2	111.3	124.2
0	MOFF	2.33	2	2005	7-10	0	1.5	0.607042	0.54	0.218535	180	63	3	1	0	510.5	8.4	155.4	23.7	112	22.3	43.4	25	43.2	173.7
0	MOFF	2.33	2	2005	7-10	0	1.5	0.607042	0.54	0.218535	180	63	3	1	0	510.5	8.4	155.4	23.7	112	22.3	43.4	25	43.2	173.7
0	MOFF	2.33	2	2006	3-6	9	0	0	0.88	0.356131	180	2	5	0	1	379.7	9.3	152.7	24.1	91.4	22.9	61.2	25.3	112	155.4
0	MOFF	2.33	2	2006	3-6	9	0	0	0.88	0.356131	180	2	5	0	1	379.7	9.3	152.7	24.1	91.4	22.9	61.2	25.3	112	155.4
0	MOFF	2.33	2	2006	3-6	9	0	0	0.88	0.356131	180	2	5	0	1	379.7	9.3	152.7	24.1	91.4	22.9	61.2	25.3	112	155.4
0	MOFF	2.33	2	2006	3-6	9	0	0	0.88	0.356131	180	2	5	0	1	379.7	9.3	152.7	24.1	91.4	22.9	61.2	25.3	112	155.4
0	MOFF	2.33	2	2006	3-6	9	0	0	0.88	0.356131	180	2	5	0	1	379.7	9.3	152.7	24.1	91.4	22.9	61.2	25.3	112	155.4
0	MOFF	2.33	2	2006	3-6	9	0	0	0.88	0.356131	180	2	5	0	1	379.7	9.3	152.7	24.1	91.4	22.9	61.2	25.3	112	155.4
0	MOFF	2.33	2	2006	3-6	9	0	0	0.88	0.356131	180	2	5	0	1	379.7	9.3	152.7	24.1	91.4	22.9	61.2	25.3	112	155.4
0	MOFF	2.33	2	2006	3-6	9	0	0	0.88	0.356131	180	2	5	0	1	379.7	9.3	152.7	24.1	91.4	22.9	61.2	25.3	112	155.4
0	MOFF	2.33	2	2007	3-6	0	1.7	0.687981	0.88	0.356131	180	1	20	4	9	709.7	7.6	182.4	23	72.6	21.4	109.7	24.6	91.4	152.7
0	MOFF	2.33	2	2007	3-6	0	1.7	0.687981	0.88	0.356131	180	1	20	4	9	709.7	7.6	182.4	23	72.6	21.4	109.7	24.6	91.4	152.7
0	MOFF	2.33	2	2007	7-10	1	0	0	1.22	0.493727	180	2	4	3	1	709.7	7.6	182.4	23	72.6	21.4	109.7	24.6	91.4	152.7
0	MOFL	2.33	2	2003	3-6	180	0	0	0	0	10	37	1	0	1	480.1	7.8	124.2	22.6	111.3	20.1	13	25.2	34.5	56.1
0	MOFL	2.33	2	2003	3-6	180	0	0	0	0	10	37	1	0	1	480.1	7.8	124.2	22.6	111.3	20.1	13	25.2	34.5	56.1
0	MOFL	2.33	2	2003	7-10	180	0	0	0	0	11	38	0	0	0	480.1	7.8	124.2	22.6	111.3	20.1	13	25.2	34.5	56.1
0	MOFL	2.33	2	2003	7-10	180	0	0	0	0	11	38	0	0	0	480.1	7.8	124.2	22.6	111.3	20.1	13	25.2	34.5	56.1
0	MOFL	2.33	2	2003	7-10	180	0	0	0	0	11	38	0	0	0	480.1	7.8	124.2	22.6	111.3	20.1	13	25.2	34.5	56.1
0	MOFL	2.33	2	2003	7-10	180	0	0	0	0	11	38	0	0	0	480.1	7.8	124.2	22.6	111.3	20.1	13	25.2	34.5	56.1
0	MOFL	2.33	2	2003	7-10	180	0	0	0	0	11	38	0	0	0	480.1	7.8	124.2	22.6	111.3	20.1	13	25.2	34.5	56.1
0	MOFL	2.33	2	2003	7-10	180	0	0	0	0	11	38	0	0	0	480.1	7.8	124.2	22.6	111.3	20.1	13	25.2	34.5	56.1
0	MOFN	2.5	1	2002	3-6	7	0	0	0.84	0.339943	180	73	0	0	0	369.8	8.5	56.1	25.3	34.5	24.5	21.6	26.2	27.2	104.6
0	MOFN	2.5	1	2002	3-6	7	0	0	0.84	0.339943	180	73	0	0	0	369.8	8.5	56.1	25.3	34.5	24.5	21.6	26.2	27.2	104.6
0	MOFN	2.5	1	2002	3-6	7	0	0	0.84	0.339943	180	73	0	0	0	369.8	8.5	56.1	25.3	34.5	24.5	21.6	26.2	27.2	104.6
0	MOFN	2.5	1	2002	3-6	7	0	0	0.84	0.339943	180	73	0	0	0	369.8	8.5	56.1	25.3	34.5	24.5	21.6	26.2	27.2	104.6
0	MOFN	2.5	1	2002	3-6	7	0	0	0.84	0.339943	180	73	0	0	0	369.8	8.5	56.1	25.3	34.5	24.5	21.6	26.2	27.2	104.6
0	MOFN	2.5	1	2002	3-6	7	0	0	0.84	0.339943	180	73	0	0	0	369.8	8.5	56.1	25.3	34.5	24.5	21.6	26.2	27.2	104.6
0	MOFN	2.5	1	2002	3-6	7	0	0	0.84	0.339943	180	73	0	0	0	369.8	8.5	56.1	25.3	34.5	24.5	21.6	26.2	27.2	104.6
0	MOFN	2.5	1	2002	3-6	7	0	0	0.84	0.339943	180	73	0	0	0	369.8	8.5	56.1	25.3	34.5	24.5	21.6	26.2	27.2	104.6
0	MOFN	2.5	1	2002	3-6	7	0	0	0.84	0.339943	180	73	0	0	0	369.8	8.5	56.1	25.3	34.5	24.5	21.6	26.2	27.2	104.6
0	MOFN	2.5	1	2002	3-6	7	0	0	0.84	0.339943	180	73	0	0	0	369.8	8.5	56.1	25.3	34.5	24.5	21.6	26.2	27.2	104.6
0	MOFN	2.5	1	2004	3-6	7	0	0	0.914	0.369891	180	13	4	0	4	378	8.2	173.7	20.9	43.2	19.7	130.6	22.2	111.3	124.2
0	MOFN	2.5	1	2004	3-6	7	0	0	0.914	0.369891	180	13	4	0	4	378	8.2	173.7	20.9	43.2	19.7	130.6	22.2	111.3	124.2
0	MOFN	2.5	1	2004	3-6	7	0	0	0.914	0.369891	180	13	4	0	4	378	8.2	173.7	20.9	43.2	19.7	130.6	22.2	111.3	124.2
0	MOFN	2.5	1	2005	3-6	9	0	0	1.06	0.428976	180	25	6	0	2	510.5	8.4	155.4	23.7	112	22.3	43.4	25	43.2	173.7
0	MOFN	2.5	1	2005	3-6	9	0	0	1.06	0.428976	180	25	6	0	2	510.5	8.4	155.4	23.7	112	22.3	43.4	25	43.2	173.7
0	MOFN	2.5	1	2005	3-6	9	0	0	1.06	0.428976	180	25	6	0	2	510.5	8.4	155.4	23.7	112	22.3	43.4	25	43.2	173.7
0	MOFN	2.5	1	2005	3-6	9	0	0	1.06	0.428976	180	25	6	0	2	510.5	8.4	155.4	23.7	112	22.3	43.4	25	43.2	173.7
0	MOFN	2.5	1	2006	3-6	21	0	0	0.74	0.299474	180	37	9	0	6	379.7	9.3	152.7	24.1	91.4	22.9	61.2	25.3	112	155.4
0	MOFN	2.5	1	2006	3-6	21	0	0	0.74	0.299474	180	37	9	0	6	379.7	9.3	152.7	24.1	91.4	22.9	61.2	25.3	112	155.4
0	MOFN	2.5	1	2006	3-6	21	0	0	0.74	0.299474	180	37	9	0	6	379.7	9.3	152.7	24.1	91.4	22.9	61.2	25.3	112	155.4
0	MOFN	2.5	1	2006	3-6	21	0	0	0.74	0.299474	180	37	9	0	6	379.7	9.3	152.7	24.1	91.4	22.9	61.2	25.3	112	155.4
0	MOFN	2.5	1	2006	3-6	21	0	0	0.74	0.299474	180	37	9	0	6	379.7	9.3	152.7	24.1	91.4	22.9	61.2	25.3	112	155.4
0	MOFN	2.5	1	2006	3-6	21	0	0	0.74	0.299474	180	37	9	0	6	379.7	9.3	152.7	24.1	91.4	22.9	61.2	25.3	112	155.4
0	MOFN	2.5	1	2006	3-6	21	0	0	0.74	0.299474	180	37	9	0	6	379.7	9.3	152.7	24.1	91.4	22.9	61.2	25.3	112	155.4
0	MOFN	2.5	1	2006	3-6	21	0	0	0.74	0.299474	180	37	9	0	6	379.7	9.3	152.7	24.1	91.4	22.9	61.2	25.3	112	155.4
0	MOFN	2.5	1	2006	3-6	21	0	0	0.74	0.299474	180	37	9	0	6	379.7	9.3	152.7	24.1	91.4	22.9	61.2	25.3	112	155.4
0	MOFN	2.5	1	2006	3-6	21	0	0	0.74	0.299474	180	37	9	0	6	379.7	9.3	152.7	24.1	91.4	22.9	61.2	25.3	112	155.4
0	MOFN	2.5	1	2006	3-6	21	0	0	0.74	0.299474	180	37	9	0	6	379.7	9.3	152.7	24.1	91.4	22.9	61.2	25.3	112	155.4
0	MOFN	2.5	1	2006	3-6	21	0	0	0.74	0.299474	180	37	9	0	6	379.7	9.3	152.7	24.1	91.4	22.9	61.2	25.3	112	155.4
0	MOFN	2.5	1	2006	3-6	21	0	0	0.74	0.299474	180	37	9	0	6	379.7	9.3	152.7	24.1	91.4	22.9	61.2	25.3	112	155.4
0	MOFN	2.5	1	2006	3-6	21	0	0	0.74	0.299474	180	37	9	0	6	379.7	9.3	152.7	24.1	91.4	22.9	61.2	25.3	112	155.4
0	MOFR	3	1	2003	3-6	9	0	0	0.488	0.197491	180	13	3	0	3	480.1	7.8	124.2	22.6	111.3	20.1	13	25.2	34.5	56.1
0	MOFR	3	1	2003	3-6	9	0	0	0.488	0.197491	180	13	3	0	3	480.1	7.8	124.2	22.6	111.3	20.1	13	25.2	34.5	56.1
0	MOFR	3	1	2003	3-6	9	0	0	0.488	0.197491	180	13	3	0	3	480.1	7.8	124.2	22.6	111.3	20.1	13	25.2	34.5	56.1
0	MOFR	3	1	2003	3-6	9	0	0	0.488	0.197491	180	13	3	0	3	480.1	7.8	124.2	22.6	111.3	20.1	13	25.2	34.5	56.1
0	MOFR	3	1	2003	3-6	9	0	0	0.488	0.197491	180	13	3	0	3	480.1	7.8	124.2	22.6	111.3	20.1	13	25.2	34.5	56.1
0	MOFR	3	1	2003	3-6	9	0	0	0.488	0.197491	180	13	3	0	3	480.1	7.8	124.2	22.6	111.3	20.1	13	25.2	34.5	56.1
0	MOFR	3	1	2003	3-6	9	0	0	0.488	0.197491	180	13	3	0	3	480.1	7.8	124.2	22.6	111.3	20.1	13	25.2	34.5	56.1
0	MOFR	3	1	2003	7-10	10	0	0	0.488	0.197491	180	14	0	0	0	480.1	7.8	124.2	22.6	111.3	20.1	13	25.2	34.5	56.1
0	MOFR	3	1	2003	7-10	10	0	0	0.488	0.197491	180	14	0	0	0	480.1	7.8	124.2	22.6	111.3	20.1	13	25.2	34.5	56.1
0	MOFR	3	1	2005	3-6	7	0	0	0.54	0.218535	180	37	17	0	6	510.5	8.4	155.4	23.7	112	22.3	43.4	25	43.2	173.7
0	MOFR	3	1	2005	3-6	7	0	0	0.54	0.218535	180	37	17	0	6	510.5	8.4	155.4	23.7	112	22.3	43.4	25	43.2	173.7
0	MOFR	3	1	2005	3-6	7	0	0	0.54	0.218535	180	37	17	0	6	510.5	8.4	155.4	23.7	112	22.3	43.4	25	43.2	173.7
0	MOFR	3	1	2005	3-6	7	0	0	0.54	0.218535	180	37	17	0	6	510.5	8.4	155.4	23.7	112	22.3	43.4	25	43.2	173.7
0	MOFR	3	1	2005	3-6	7	0	0	0.54	0.218535	180	37	17	0	6	510.5	8.4	155.4	23.7	112	22.3	43.4	25	43.2	173.7
0	MOFR	3	1	2005	3-6	7	0	0	0.54	0.218535	180	37	17	0	6	510.5	8.4	155.4	23.7	112	22.3	43.4	25	43.2	173.7
0	MOFR	3	1	2005	7-10	0	1.6	0.647511	0.86	0.348037	180	38	1	1	0	510.5	8.4	155.4	23.7	112	22.3	43.4	25	43.2	173.7
0	MOFR	3	1	2005	7-10	0	1.6	0.647511	0.86	0.348037	180	38	1	1	0	510.5	8.4	155.4	23.7	112	22.3	43.4	25	43.2	173.7
0	MOFR	3	1	2006	3-6	9	0	0	0.86	0.348037	180	49	15	1	7	379.7	9.3	152.7	24.1	91.4	22.9	61.2	25.3	112	155.4
0	MOFR	3	1	2006	3-6	9	0	0	0.86	0.348037	180	49	15	1	7	379.7	9.3	152.7	24.1	91.4	22.9	61.2	25.3	112	155.4
0	MOFR	3	1	2006	3-6	9	0	0	0.86	0.348037	180	49	15	1	7	379.7	9.3	152.7	24.1	91.4	22.9	61.2	25.3	112	155.4
0	MOFR	3	1	2006	3-6	9	0	0	0.86	0.348037	180	49	15	1	7	379.7	9.3	152.7	24.1	91.4	22.9	61.2	25.3	112	155.4
0	MOFR	3	1	2006	3-6	9	0	0	0.86	0.348037	180	49	15	1	7	379.7	9.3	152.7	24.1	91.4	22.9	61.2	25.3	112	155.4
0	MOFR	3	1	2006	3-6	9	0	0	0.86	0.348037	180	49	15	1	7	379.7	9.3	152.7	24.1	91.4	22.9	61.2	25.3	112	155.4
0	MOFR	3	1	2006	3-6	9	0	0	0.86	0.348037	180	49	15	1	7	379.7	9.3	152.7	24.1	91.4	22.9	61.2	25.3	112	155.4
0	MOFR	3	1	2006	3-6	9	0	0	0.86	0.348037	180	49	15	1	7	379.7	9.3	152.7	24.1	91.4	22.9	61.2	25.3	112	155.4
0	MOFR	3	1	2006	3-6	9	0	0	0.86	0.348037	180	49	15	1	7	379.7	9.3	152.7	24.1	91.4	22.9	61.2	25.3	112	155.4
0	MOFR	3	1	2006	7-10	10	0	0	0.86	0.348037	180	50	3	2	0	379.7	9.3	152.7	24.1	91.4	22.9	61.2	25.3	112	155.4
0	MOFR	3	1	2006	7-10	10	0	0	0.86	0.348037	180	50	3	2	0	379.7	9.3	152.7	24.1	91.4	22.9	61.2	25.3	112	155.4
0	MOFR	3	1	2006	7-10	10	0	0	0.86	0.348037	180	50	3	2	0	379.7	9.3	152.7	24.1	91.4	22.9	61.2	25.3	112	155.4
0	MOFR	3	1	2006	7-10	10	0	0	0.86	0.348037	180	50	3	2	0	379.7	9.3	152.7	24.1	91.4	22.9	61.2	25.3	112	155.4
0	MOFR	3	1	2006	7-10	10	0	0	0.86	0.348037	180	50	3	2	0	379.7	9.3	152.7	24.1	91.4	22.9	61.2	25.3	112	155.4
0	MOFR	3	1	2006	7-10	10	0	0	0.86	0.348037	180	50	3	2	0	379.7	9.3	152.7	24.1	91.4	22.9	61.2	25.3	112	155.4
0	MOFR	3	1	2006	7-10	10	0	0	0.86	0.348037	180	50	3	2	0	379.7	9.3	152.7	24.1	91.4	22.9	61.2	25.3	112	155.4
0	MOFR	3	1	2006	7-10	10	0	0	0.86	0.348037	180	50	3	2	0	379.7	9.3	152.7	24.1	91.4	22.9	61.2	25.3	112	155.4
0	MOFR	3	1	2006	7-10	10	0	0	0.86	0.348037	180	50	3	2	0	379.7	9.3	152.7	24.1	91.4	22.9	61.2	25.3	112	155.4
0	MOFR	3	1	2007	3-6	21	0	0	0.66	0.267098	180	61	7	1	2	709.7	7.6	182.4	23	72.6	21.4	109.7	24.6	91.4	152.7
0	MOFR	3	1	2007	3-6	21	0	0	0.66	0.267098	180	61	7	1	2	709.7	7.6	182.4	23	72.6	21.4	109.7	24.6	91.4	152.7
0	MOFR	3	1	2007	3-6	21	0	0	0.66	0.267098	180	61	7	1	2	709.7	7.6	182.4	23	72.6	21.4	109.7	24.6	91.4	152.7
0	MOFR	3	1	2007	3-6	21	0	0	0.66	0.267098	180	61	7	1	2	709.7	7.6	182.4	23	72.6	21.4	109.7	24.6	91.4	152.7
0	MOFR	3	1	2007	3-6	21	0	0	0.66	0.267098	180	61	7	1	2	709.7	7.6	182.4	23	72.6	21.4	109.7	24.6	91.4	152.7
0	MOFR	3	1	2007	7-10	22	0	0	0.66	0.267098	180	62	7	3	2	709.7	7.6	182.4	23	72.6	21.4	109.7	24.6	91.4	152.7
0	MOFS	2.67	1	2002	3-6	180	0	0	0	0	32	89	0	0	0	369.8	8.5	56.1	25.3	34.5	24.5	21.6	26.2	27.2	104.6
0	MOFS	2.67	1	2002	3-6	180	0	0	0	0	32	89	0	0	0	369.8	8.5	56.1	25.3	34.5	24.5	21.6	26.2	27.2	104.6
0	MOFT	4	1	2002	3-6	70	0	0	0.518	0.209632	180	13	0	0	0	369.8	8.5	56.1	25.3	34.5	24.5	21.6	26.2	27.2	104.6
0	MOFT	4	1	2002	3-6	70	0	0	0.518	0.209632	180	13	0	0	0	369.8	8.5	56.1	25.3	34.5	24.5	21.6	26.2	27.2	104.6
0	MOFT	4	1	2002	3-6	70	0	0	0.518	0.209632	180	13	0	0	0	369.8	8.5	56.1	25.3	34.5	24.5	21.6	26.2	27.2	104.6
0	MOFT	4	1	2002	3-6	70	0	0	0.518	0.209632	180	13	0	0	0	369.8	8.5	56.1	25.3	34.5	24.5	21.6	26.2	27.2	104.6
0	MOFT	4	1	2002	3-6	70	0	0	0.518	0.209632	180	13	0	0	0	369.8	8.5	56.1	25.3	34.5	24.5	21.6	26.2	27.2	104.6
0	MOFT	4	1	2002	3-6	70	0	0	0.518	0.209632	180	13	0	0	0	369.8	8.5	56.1	25.3	34.5	24.5	21.6	26.2	27.2	104.6
0	MOFT	4	1	2002	3-6	70	0	0	0.518	0.209632	180	13	0	0	0	369.8	8.5	56.1	25.3	34.5	24.5	21.6	26.2	27.2	104.6
0	MOFT	4	1	2002	7-10	71	0	0	0.518	0.209632	180	14	0	0	0	369.8	8.5	56.1	25.3	34.5	24.5	21.6	26.2	27.2	104.6
0	MOFT	4	1	2002	7-10	71	0	0	0.518	0.209632	180	14	0	0	0	369.8	8.5	56.1	25.3	34.5	24.5	21.6	26.2	27.2	104.6
0	MOFT	4	1	2003	3-6	0	1.7	0.687981	0.322	0.130312	180	25	7	1	3	480.1	7.8	124.2	22.6	111.3	20.1	13	25.2	34.5	56.1
0	MOFT	4	1	2003	3-6	0	1.7	0.687981	0.322	0.130312	180	25	7	1	3	480.1	7.8	124.2	22.6	111.3	20.1	13	25.2	34.5	56.1
0	MOFT	4	1	2003	3-6	0	1.7	0.687981	0.322	0.130312	180	25	7	1	3	480.1	7.8	124.2	22.6	111.3	20.1	13	25.2	34.5	56.1
0	MOFT	4	1	2003	3-6	0	1.7	0.687981	0.322	0.130312	180	25	7	1	3	480.1	7.8	124.2	22.6	111.3	20.1	13	25.2	34.5	56.1
0	MOFT	4	1	2003	3-6	0	1.7	0.687981	0.322	0.130312	180	25	7	1	3	480.1	7.8	124.2	22.6	111.3	20.1	13	25.2	34.5	56.1
0	MOFT	4	1	2003	3-6	0	1.7	0.687981	0.322	0.130312	180	25	7	1	3	480.1	7.8	124.2	22.6	111.3	20.1	13	25.2	34.5	56.1
0	MOFT	4	1	2003	3-6	0	1.7	0.687981	0.322	0.130312	180	25	7	1	3	480.1	7.8	124.2	22.6	111.3	20.1	13	25.2	34.5	56.1
0	MOFT	4	1	2003	3-6	0	1.7	0.687981	0.322	0.130312	180	25	7	1	3	480.1	7.8	124.2	22.6	111.3	20.1	13	25.2	34.5	56.1
0	MOFT	4	1	2003	3-6	0	1.7	0.687981	0.322	0.130312	180	25	7	1	3	480.1	7.8	124.2	22.6	111.3	20.1	13	25.2	34.5	56.1
0	MOFT	4	1	2003	3-6	0	1.7	0.687981	0.322	0.130312	180	25	7	1	3	480.1	7.8	124.2	22.6	111.3	20.1	13	25.2	34.5	56.1
0	MOFT	4	1	2003	3-6	0	1.7	0.687981	0.322	0.130312	180	25	7	1	3	480.1	7.8	124.2	22.6	111.3	20.1	13	25.2	34.5	56.1
0	MOFT	4	1	2003	3-6	0	1.7	0.687981	0.322	0.130312	180	25	7	1	3	480.1	7.8	124.2	22.6	111.3	20.1	13	25.2	34.5	56.1
0	MOFT	4	1	2003	7-10	1	0	0	0.322	0.130312	180	26	0	0	0	480.1	7.8	124.2	22.6	111.3	20.1	13	25.2	34.5	56.1
0	MOFT	4	1	2003	7-10	1	0	0	0.322	0.130312	180	26	0	0	0	480.1	7.8	124.2	22.6	111.3	20.1	13	25.2	34.5	56.1
0	MOFT	4	1	2004	3-6	7	0	0	0.674	0.272764	180	2	6	1	4	378	8.2	173.7	20.9	43.2	19.7	130.6	22.2	111.3	124.2
0	MOFT	4	1	2005	3-6	9	0	0	0.52	0.210441	180	14	14	1	7	510.5	8.4	155.4	23.7	112	22.3	43.4	25	43.2	173.7
0	MOFT	4	1	2005	3-6	9	0	0	0.52	0.210441	180	14	14	1	7	510.5	8.4	155.4	23.7	112	22.3	43.4	25	43.2	173.7
0	MOFT	4	1	2005	3-6	9	0	0	0.52	0.210441	180	14	14	1	7	510.5	8.4	155.4	23.7	112	22.3	43.4	25	43.2	173.7
0	MOFT	4	1	2005	3-6	9	0	0	0.52	0.210441	180	14	14	1	7	510.5	8.4	155.4	23.7	112	22.3	43.4	25	43.2	173.7
0	MOFT	4	1	2005	3-6	9	0	0	0.52	0.210441	180	14	14	1	7	510.5	8.4	155.4	23.7	112	22.3	43.4	25	43.2	173.7
0	MOFT	4	1	2005	3-6	9	0	0	0.52	0.210441	180	14	14	1	7	510.5	8.4	155.4	23.7	112	22.3	43.4	25	43.2	173.7
0	MOFT	4	1	2005	3-6	9	0	0	0.52	0.210441	180	14	14	1	7	510.5	8.4	155.4	23.7	112	22.3	43.4	25	43.2	173.7
0	MOFT	4	1	2005	3-6	9	0	0	0.52	0.210441	180	14	14	1	7	510.5	8.4	155.4	23.7	112	22.3	43.4	25	43.2	173.7
0	MOFT	4	1	2005	3-6	9	0	0	0.52	0.210441	180	14	14	1	7	510.5	8.4	155.4	23.7	112	22.3	43.4	25	43.2	173.7
0	MOFT	4	1	2005	3-6	9	0	0	0.52	0.210441	180	14	14	1	7	510.5	8.4	155.4	23.7	112	22.3	43.4	25	43.2	173.7
0	MOFT	4	1	2005	3-6	9	0	0	0.52	0.210441	180	14	14	1	7	510.5	8.4	155.4	23.7	112	22.3	43.4	25	43.2	173.7
0	MOFT	4	1	2005	3-6	9	0	0	0.52	0.210441	180	14	14	1	7	510.5	8.4	155.4	23.7	112	22.3	43.4	25	43.2	173.7
0	MOFT	4	1	2005	3-6	9	0	0	0.52	0.210441	180	14	14	1	7	510.5	8.4	155.4	23.7	112	22.3	43.4	25	43.2	173.7
0	MOFT	4	1	2005	3-6	9	0	0	0.52	0.210441	180	14	14	1	7	510.5	8.4	155.4	23.7	112	22.3	43.4	25	43.2	173.7
0	MOFT	4	1	2005	3-6	9	0	0	0.52	0.210441	180	14	14	1	7	510.5	8.4	155.4	23.7	112	22.3	43.4	25	43.2	173.7
0	MOFT	4	1	2005	3-6	9	0	0	0.52	0.210441	180	14	14	1	7	510.5	8.4	155.4	23.7	112	22.3	43.4	25	43.2	173.7
0	MOFT	4	1	2005	3-6	9	0	0	0.52	0.210441	180	14	14	1	7	510.5	8.4	155.4	23.7	112	22.3	43.4	25	43.2	173.7
0	MOFT	4	1	2005	3-6	9	0	0	0.52	0.210441	180	14	14	1	7	510.5	8.4	155.4	23.7	112	22.3	43.4	25	43.2	173.7
0	MOFT	4	1	2005	7-10	10	0	0	0.82	0.331849	180	15	7	2	3	510.5	8.4	155.4	23.7	112	22.3	43.4	25	43.2	173.7
0	MOFT	4	1	2006	3-6	0	1.7	0.687981	0.82	0.331849	180	26	7	0	5	379.7	9.3	152.7	24.1	91.4	22.9	61.2	25.3	112	155.4
0	MOFT	4	1	2006	3-6	0	1.7	0.687981	0.82	0.331849	180	26	7	0	5	379.7	9.3	152.7	24.1	91.4	22.9	61.2	25.3	112	155.4
0	MOFT	4	1	2006	3-6	0	1.7	0.687981	0.82	0.331849	180	26	7	0	5	379.7	9.3	152.7	24.1	91.4	22.9	61.2	25.3	112	155.4
0	MOFT	4	1	2006	3-6	0	1.7	0.687981	0.82	0.331849	180	26	7	0	5	379.7	9.3	152.7	24.1	91.4	22.9	61.2	25.3	112	155.4
0	MOFT	4	1	2006	3-6	0	1.7	0.687981	0.82	0.331849	180	26	7	0	5	379.7	9.3	152.7	24.1	91.4	22.9	61.2	25.3	112	155.4
0	MOFT	4	1	2006	3-6	0	1.7	0.687981	0.82	0.331849	180	26	7	0	5	379.7	9.3	152.7	24.1	91.4	22.9	61.2	25.3	112	155.4
0	MOFT	4	1	2006	3-6	0	1.7	0.687981	0.82	0.331849	180	26	7	0	5	379.7	9.3	152.7	24.1	91.4	22.9	61.2	25.3	112	155.4
0	MOFT	4	1	2006	3-6	0	1.7	0.687981	0.82	0.331849	180	26	7	0	5	379.7	9.3	152.7	24.1	91.4	22.9	61.2	25.3	112	155.4
0	MOFT	4	1	2006	3-6	0	1.7	0.687981	0.82	0.331849	180	26	7	0	5	379.7	9.3	152.7	24.1	91.4	22.9	61.2	25.3	112	155.4
0	MOFT	4	1	2006	3-6	0	1.7	0.687981	0.82	0.331849	180	26	7	0	5	379.7	9.3	152.7	24.1	91.4	22.9	61.2	25.3	112	155.4
0	MOFT	4	1	2006	3-6	0	1.7	0.687981	0.82	0.331849	180	26	7	0	5	379.7	9.3	152.7	24.1	91.4	22.9	61.2	25.3	112	155.4
0	MOFT	4	1	2006	3-6	0	1.7	0.687981	0.82	0.331849	180	26	7	0	5	379.7	9.3	152.7	24.1	91.4	22.9	61.2	25.3	112	155.4
0	MOFT	4	1	2006	3-6	0	1.7	0.687981	0.82	0.331849	180	26	7	0	5	379.7	9.3	152.7	24.1	91.4	22.9	61.2	25.3	112	155.4
0	MOFT	4	1	2006	3-6	0	1.7	0.687981	0.82	0.331849	180	26	7	0	5	379.7	9.3	152.7	24.1	91.4	22.9	61.2	25.3	112	155.4
0	MOFT	4	1	2006	3-6	0	1.7	0.687981	0.82	0.331849	180	26	7	0	5	379.7	9.3	152.7	24.1	91.4	22.9	61.2	25.3	112	155.4
0	MOFT	4	1	2006	3-6	0	1.7	0.687981	0.82	0.331849	180	26	7	0	5	379.7	9.3	152.7	24.1	91.4	22.9	61.2	25.3	112	155.4
0	MOFT	4	1	2006	7-10	1	0	0	0.82	0.331849	180	27	2	2	0	379.7	9.3	152.7	24.1	91.4	22.9	61.2	25.3	112	155.4
0	MOFT	4	1	2006	7-10	1	0	0	0.82	0.331849	180	27	2	2	0	379.7	9.3	152.7	24.1	91.4	22.9	61.2	25.3	112	155.4
0	MOFT	4	1	2006	7-10	1	0	0	0.82	0.331849	180	27	2	2	0	379.7	9.3	152.7	24.1	91.4	22.9	61.2	25.3	112	155.4
0	MOFT	4	1	2006	7-10	1	0	0	0.82	0.331849	180	27	2	2	0	379.7	9.3	152.7	24.1	91.4	22.9	61.2	25.3	112	155.4
0	MOFT	4	1	2006	7-10	1	0	0	0.82	0.331849	180	27	2	2	0	379.7	9.3	152.7	24.1	91.4	22.9	61.2	25.3	112	155.4
0	MOFT	4	1	2006	7-10	1	0	0	0.82	0.331849	180	27	2	2	0	379.7	9.3	152.7	24.1	91.4	22.9	61.2	25.3	112	155.4
1	MOFT	4	1	2006	7-10	1	0	0	0.82	0.331849	180	27	2	2	0	379.7	9.3	152.7	24.1	91.4	22.9	61.2	25.3	112	155.4
0	MOFT	4	1	2007	3-6	7	0	0	1.16	0.469446	180	1	10	1	5	709.7	7.6	182.4	23	72.6	21.4	109.7	24.6	91.4	152.7
0	MOFT	4	1	2007	3-6	7	0	0	1.16	0.469446	180	1	10	1	5	709.7	7.6	182.4	23	72.6	21.4	109.7	24.6	91.4	152.7
0	MOFV	2	2	2002	3-6	180	0	0	0	0	32	73	0	0	0	369.8	8.5	56.1	25.3	34.5	24.5	21.6	26.2	27.2	104.6
0	MOFV	2	2	2002	3-6	180	0	0	0	0	32	73	0	0	0	369.8	8.5	56.1	25.3	34.5	24.5	21.6	26.2	27.2	104.6
0	MOFV	2	2	2002	3-6	180	0	0	0	0	32	73	0	0	0	369.8	8.5	56.1	25.3	34.5	24.5	21.6	26.2	27.2	104.6
0	MOFV	2	2	2002	3-6	180	0	0	0	0	32	73	0	0	0	369.8	8.5	56.1	25.3	34.5	24.5	21.6	26.2	27.2	104.6
0	MOFV	2	2	2002	3-6	180	0	0	0	0	32	73	0	0	0	369.8	8.5	56.1	25.3	34.5	24.5	21.6	26.2	27.2	104.6
0	MOFV	2	2	2002	3-6	180	0	0	0	0	32	73	0	0	0	369.8	8.5	56.1	25.3	34.5	24.5	21.6	26.2	27.2	104.6
0	MOFV	2	2	2002	3-6	180	0	0	0	0	32	73	0	0	0	369.8	8.5	56.1	25.3	34.5	24.5	21.6	26.2	27.2	104.6
0	MOFV	2	2	2002	3-6	180	0	0	0	0	32	73	0	0	0	369.8	8.5	56.1	25.3	34.5	24.5	21.6	26.2	27.2	104.6
0	MOFV	2	2	2002	7-10	180	0	0	0	0	33	74	0	0	0	369.8	8.5	56.1	25.3	34.5	24.5	21.6	26.2	27.2	104.6
0	MOFV	2	2	2002	7-10	180	0	0	0	0	33	74	0	0	0	369.8	8.5	56.1	25.3	34.5	24.5	21.6	26.2	27.2	104.6
0	MOFV	2	2	2005	3-6	180	0	0	0	0	10	109	1	0	1	510.5	8.4	155.4	23.7	112	22.3	43.4	25	43.2	173.7
0	MOFV	2	2	2005	3-6	180	0	0	0	0	10	109	1	0	1	510.5	8.4	155.4	23.7	112	22.3	43.4	25	43.2	173.7
0	MOFV	2	2	2005	7-10	180	0	0	0	0	11	110	4	0	2	510.5	8.4	155.4	23.7	112	22.3	43.4	25	43.2	173.7
0	MOFV	2	2	2006	3-6	180	0	0	0	0	180	121	3	0	2	379.7	9.3	152.7	24.1	91.4	22.9	61.2	25.3	112	155.4
0	MOFV	2	2	2006	3-6	180	0	0	0	0	180	121	3	0	2	379.7	9.3	152.7	24.1	91.4	22.9	61.2	25.3	112	155.4
0	MOFV	2	2	2006	7-10	180	0	0	0	0	11	122	2	2	0	379.7	9.3	152.7	24.1	91.4	22.9	61.2	25.3	112	155.4
0	MOFV	2	2	2006	7-10	180	0	0	0	0	11	122	2	2	0	379.7	9.3	152.7	24.1	91.4	22.9	61.2	25.3	112	155.4
0	MOPT	3.5	1	2005	3-6	0	1.7	0.687981	0.936	0.378794	180	1	7	0	3	510.5	8.4	155.4	23.7	112	22.3	43.4	25	43.2	173.7
0	MOPT	3.5	1	2005	3-6	0	1.7	0.687981	0.936	0.378794	180	1	7	0	3	510.5	8.4	155.4	23.7	112	22.3	43.4	25	43.2	173.7
0	MOPT	3.5	1	2005	3-6	0	1.7	0.687981	0.936	0.378794	180	1	7	0	3	510.5	8.4	155.4	23.7	112	22.3	43.4	25	43.2	173.7
0	MOPT	3.5	1	2005	3-6	0	1.7	0.687981	0.936	0.378794	180	1	7	0	3	510.5	8.4	155.4	23.7	112	22.3	43.4	25	43.2	173.7
0	MOPT	3.5	1	2005	3-6	0	1.7	0.687981	0.936	0.378794	180	1	7	0	3	510.5	8.4	155.4	23.7	112	22.3	43.4	25	43.2	173.7
0	MOPT	3.5	1	2005	7-10	1	0	0	0.936	0.378794	180	2	3	2	1	510.5	8.4	155.4	23.7	112	22.3	43.4	25	43.2	173.7
0	MOPT	3.5	1	2005	7-10	1	0	0	0.936	0.378794	180	2	3	2	1	510.5	8.4	155.4	23.7	112	22.3	43.4	25	43.2	173.7
0	MOPT	3.5	1	2006	3-6	7	0	0	0.88	0.356131	180	13	3	0	1	379.7	9.3	152.7	24.1	91.4	22.9	61.2	25.3	112	155.4
0	MOPT	3.5	1	2006	3-6	7	0	0	0.88	0.356131	180	13	3	0	1	379.7	9.3	152.7	24.1	91.4	22.9	61.2	25.3	112	155.4
0	MOPT	3.5	1	2006	3-6	7	0	0	0.88	0.356131	180	13	3	0	1	379.7	9.3	152.7	24.1	91.4	22.9	61.2	25.3	112	155.4
0	MOPT	3.5	1	2006	3-6	7	0	0	0.88	0.356131	180	13	3	0	1	379.7	9.3	152.7	24.1	91.4	22.9	61.2	25.3	112	155.4
0	MOPT	3.5	1	2006	3-6	7	0	0	0.88	0.356131	180	13	3	0	1	379.7	9.3	152.7	24.1	91.4	22.9	61.2	25.3	112	155.4
0	MOPT	3.5	1	2006	3-6	7	0	0	0.88	0.356131	180	13	3	0	1	379.7	9.3	152.7	24.1	91.4	22.9	61.2	25.3	112	155.4
0	MOPT	3.5	1	2006	3-6	7	0	0	0.88	0.356131	180	13	3	0	1	379.7	9.3	152.7	24.1	91.4	22.9	61.2	25.3	112	155.4
0	MOPT	3.5	1	2006	3-6	7	0	0	0.88	0.356131	180	13	3	0	1	379.7	9.3	152.7	24.1	91.4	22.9	61.2	25.3	112	155.4
0	MOPT	3.5	1	2006	3-6	7	0	0	0.88	0.356131	180	13	3	0	1	379.7	9.3	152.7	24.1	91.4	22.9	61.2	25.3	112	155.4
0	MOPT	3.5	1	2006	3-6	7	0	0	0.88	0.356131	180	13	3	0	1	379.7	9.3	152.7	24.1	91.4	22.9	61.2	25.3	112	155.4
0	MOPT	3.5	1	2006	3-6	7	0	0	0.88	0.356131	180	13	3	0	1	379.7	9.3	152.7	24.1	91.4	22.9	61.2	25.3	112	155.4
0	MOPT	3.5	1	2006	3-6	7	0	0	0.88	0.356131	180	13	3	0	1	379.7	9.3	152.7	24.1	91.4	22.9	61.2	25.3	112	155.4
0	MOPT	3.5	1	2006	3-6	7	0	0	0.88	0.356131	180	13	3	0	1	379.7	9.3	152.7	24.1	91.4	22.9	61.2	25.3	112	155.4
0	MOPT	3.5	1	2006	3-6	7	0	0	0.88	0.356131	180	13	3	0	1	379.7	9.3	152.7	24.1	91.4	22.9	61.2	25.3	112	155.4
0	MOPT	3.5	1	2006	3-6	7	0	0	0.88	0.356131	180	13	3	0	1	379.7	9.3	152.7	24.1	91.4	22.9	61.2	25.3	112	155.4
0	MOPT	3.5	1	2006	3-6	7	0	0	0.88	0.356131	180	13	3	0	1	379.7	9.3	152.7	24.1	91.4	22.9	61.2	25.3	112	155.4
0	MOPT	3.5	1	2006	3-6	7	0	0	0.88	0.356131	180	13	3	0	1	379.7	9.3	152.7	24.1	91.4	22.9	61.2	25.3	112	155.4
0	MOPT	3.5	1	2006	3-6	7	0	0	0.88	0.356131	180	13	3	0	1	379.7	9.3	152.7	24.1	91.4	22.9	61.2	25.3	112	155.4
0	MOPT	3.5	1	2006	3-6	7	0	0	0.88	0.356131	180	13	3	0	1	379.7	9.3	152.7	24.1	91.4	22.9	61.2	25.3	112	155.4
0	MOPT	3.5	1	2006	3-6	7	0	0	0.88	0.356131	180	13	3	0	1	379.7	9.3	152.7	24.1	91.4	22.9	61.2	25.3	112	155.4
0	MOPT	3.5	1	2006	3-6	7	0	0	0.88	0.356131	180	13	3	0	1	379.7	9.3	152.7	24.1	91.4	22.9	61.2	25.3	112	155.4
0	MOPT	3.5	1	2006	3-6	7	0	0	0.88	0.356131	180	13	3	0	1	379.7	9.3	152.7	24.1	91.4	22.9	61.2	25.3	112	155.4
0	MOPT	3.5	1	2006	7-10	0	1	0.404694	1.08	0.43707	180	14	3	1	1	379.7	9.3	152.7	24.1	91.4	22.9	61.2	25.3	112	155.4
0	MOPT	3.5	1	2006	7-10	0	1	0.404694	1.08	0.43707	180	14	3	1	1	379.7	9.3	152.7	24.1	91.4	22.9	61.2	25.3	112	155.4
0	MOPT	3.5	1	2006	7-10	0	1	0.404694	1.08	0.43707	180	14	3	1	1	379.7	9.3	152.7	24.1	91.4	22.9	61.2	25.3	112	155.4
0	MOPT	3.5	1	2006	7-10	0	1	0.404694	1.08	0.43707	180	14	3	1	1	379.7	9.3	152.7	24.1	91.4	22.9	61.2	25.3	112	155.4
0	MOPT	3.5	1	2006	7-10	0	1	0.404694	1.08	0.43707	180	14	3	1	1	379.7	9.3	152.7	24.1	91.4	22.9	61.2	25.3	112	155.4
0	MOPT	3.5	1	2006	7-10	0	1	0.404694	1.08	0.43707	180	14	3	1	1	379.7	9.3	152.7	24.1	91.4	22.9	61.2	25.3	112	155.4
0	MOPT	3.5	1	2006	7-10	0	1	0.404694	1.08	0.43707	180	14	3	1	1	379.7	9.3	152.7	24.1	91.4	22.9	61.2	25.3	112	155.4
0	MOPT	3.5	1	2006	7-10	0	1	0.404694	1.08	0.43707	180	14	3	1	1	379.7	9.3	152.7	24.1	91.4	22.9	61.2	25.3	112	155.4
0	MOPT	3.5	1	2006	7-10	0	1	0.404694	1.08	0.43707	180	14	3	1	1	379.7	9.3	152.7	24.1	91.4	22.9	61.2	25.3	112	155.4
0	MOPT	3.5	1	2006	7-10	0	1	0.404694	1.08	0.43707	180	14	3	1	1	379.7	9.3	152.7	24.1	91.4	22.9	61.2	25.3	112	155.4
0	MOPT	3.5	1	2006	7-10	0	1	0.404694	1.08	0.43707	180	14	3	1	1	379.7	9.3	152.7	24.1	91.4	22.9	61.2	25.3	112	155.4
1	MOPT	3.5	1	2006	7-10	0	1	0.404694	1.08	0.43707	180	14	3	1	1	379.7	9.3	152.7	24.1	91.4	22.9	61.2	25.3	112	155.4
1	MOPT	3.5	1	2006	7-10	0	1	0.404694	1.08	0.43707	180	14	3	1	1	379.7	9.3	152.7	24.1	91.4	22.9	61.2	25.3	112	155.4
1	MOPT	3.5	1	2006	7-10	0	1	0.404694	1.08	0.43707	180	14	3	1	1	379.7	9.3	152.7	24.1	91.4	22.9	61.2	25.3	112	155.4
1	MOPT	3.5	1	2006	7-10	0	1	0.404694	1.08	0.43707	180	14	3	1	1	379.7	9.3	152.7	24.1	91.4	22.9	61.2	25.3	112	155.4
0	MOPT	3.5	1	2007	3-6	9	0	0	0.74	0.299474	180	25	11	1	6	709.7	7.6	182.4	23	72.6	21.4	109.7	24.6	91.4	152.7
0	MOPT	3.5	1	2007	3-6	9	0	0	0.74	0.299474	180	25	11	1	6	709.7	7.6	182.4	23	72.6	21.4	109.7	24.6	91.4	152.7
0	MOPT	3.5	1	2007	3-6	9	0	0	0.74	0.299474	180	25	11	1	6	709.7	7.6	182.4	23	72.6	21.4	109.7	24.6	91.4	152.7
0	MOPT	3.5	1	2007	3-6	9	0	0	0.74	0.299474	180	25	11	1	6	709.7	7.6	182.4	23	72.6	21.4	109.7	24.6	91.4	152.7
0	MOPT	3.5	1	2007	3-6	9	0	0	0.74	0.299474	180	25	11	1	6	709.7	7.6	182.4	23	72.6	21.4	109.7	24.6	91.4	152.7
0	MOPT	3.5	1	2007	3-6	9	0	0	0.74	0.299474	180	25	11	1	6	709.7	7.6	182.4	23	72.6	21.4	109.7	24.6	91.4	152.7
0	MOPT	3.5	1	2007	3-6	9	0	0	0.74	0.299474	180	25	11	1	6	709.7	7.6	182.4	23	72.6	21.4	109.7	24.6	91.4	152.7
0	MOPT	3.5	1	2007	3-6	9	0	0	0.74	0.299474	180	25	11	1	6	709.7	7.6	182.4	23	72.6	21.4	109.7	24.6	91.4	152.7
0	MOPT	3.5	1	2007	3-6	9	0	0	0.74	0.299474	180	25	11	1	6	709.7	7.6	182.4	23	72.6	21.4	109.7	24.6	91.4	152.7
0	MOPT	3.5	1	2007	3-6	9	0	0	0.74	0.299474	180	25	11	1	6	709.7	7.6	182.4	23	72.6	21.4	109.7	24.6	91.4	152.7
0	MOPT	3.5	1	2007	3-6	9	0	0	0.74	0.299474	180	25	11	1	6	709.7	7.6	182.4	23	72.6	21.4	109.7	24.6	91.4	152.7
0	NOME	2.67	1	2003	3-6	180	0	0	0	0	46	37	0	0	0	480.1	7.8	124.2	22.6	111.3	20.1	13	25.2	34.5	56.1
0	NOME	2.67	1	2003	3-6	180	0	0	0	0	46	37	0	0	0	480.1	7.8	124.2	22.6	111.3	20.1	13	25.2	34.5	56.1
0	NOME	2.67	1	2003	3-6	180	0	0	0	0	46	37	0	0	0	480.1	7.8	124.2	22.6	111.3	20.1	13	25.2	34.5	56.1
0	NOME	2.67	1	2003	7-10	180	0	0	0	0	47	38	0	0	0	480.1	7.8	124.2	22.6	111.3	20.1	13	25.2	34.5	56.1
0	NOME	2.67	1	2003	7-10	180	0	0	0	0	47	38	0	0	0	480.1	7.8	124.2	22.6	111.3	20.1	13	25.2	34.5	56.1
0	NOME	2.67	1	2003	7-10	180	0	0	0	0	47	38	0	0	0	480.1	7.8	124.2	22.6	111.3	20.1	13	25.2	34.5	56.1
0	NOME	2.67	1	2004	3-6	180	0	0	0	0	58	1	4	0	4	378	8.2	173.7	20.9	43.2	19.7	130.6	22.2	111.3	124.2
0	NOME	2.67	1	2004	3-6	180	0	0	0	0	58	1	4	0	4	378	8.2	173.7	20.9	43.2	19.7	130.6	22.2	111.3	124.2
0	NOME	2.67	1	2004	3-6	180	0	0	0	0	58	1	4	0	4	378	8.2	173.7	20.9	43.2	19.7	130.6	22.2	111.3	124.2
0	NOME	2.67	1	2004	3-6	180	0	0	0	0	58	1	4	0	4	378	8.2	173.7	20.9	43.2	19.7	130.6	22.2	111.3	124.2
0	NOME	2.67	1	2004	3-6	180	0	0	0	0	58	1	4	0	4	378	8.2	173.7	20.9	43.2	19.7	130.6	22.2	111.3	124.2
0	NOME	2.67	1	2004	3-6	180	0	0	0	0	58	1	4	0	4	378	8.2	173.7	20.9	43.2	19.7	130.6	22.2	111.3	124.2
0	NOME	2.67	1	2004	3-6	180	0	0	0	0	58	1	4	0	4	378	8.2	173.7	20.9	43.2	19.7	130.6	22.2	111.3	124.2
0	NOME	2.67	1	2004	3-6	180	0	0	0	0	58	1	4	0	4	378	8.2	173.7	20.9	43.2	19.7	130.6	22.2	111.3	124.2
0	NOME	2.67	1	2004	3-6	180	0	0	0	0	58	1	4	0	4	378	8.2	173.7	20.9	43.2	19.7	130.6	22.2	111.3	124.2
0	NOME	2.67	1	2004	3-6	180	0	0	0	0	58	1	4	0	4	378	8.2	173.7	20.9	43.2	19.7	130.6	22.2	111.3	124.2
0	NOME	2.67	1	2004	7-10	180	0	0	0	0	59	2	4	0	3	378	8.2	173.7	20.9	43.2	19.7	130.6	22.2	111.3	124.2
0	NOME	2.67	1	2004	7-10	180	0	0	0	0	59	2	4	0	3	378	8.2	173.7	20.9	43.2	19.7	130.6	22.2	111.3	124.2
0	NOME	2.67	1	2004	7-10	180	0	0	0	0	59	2	4	0	3	378	8.2	173.7	20.9	43.2	19.7	130.6	22.2	111.3	124.2
0	NOME	2.67	1	2006	3-6	180	0	0	0	0	10	25	1	0	0	379.7	9.3	152.7	24.1	91.4	22.9	61.2	25.3	112	155.4
0	NOME	2.67	1	2006	3-6	180	0	0	0	0	10	25	1	0	0	379.7	9.3	152.7	24.1	91.4	22.9	61.2	25.3	112	155.4
0	NOME	2.67	1	2006	3-6	180	0	0	0	0	10	25	1	0	0	379.7	9.3	152.7	24.1	91.4	22.9	61.2	25.3	112	155.4
0	NOME	2.67	1	2017	3-6	1	0	0	0.84	0.339943	115	13	0	0	0	444.2	9.1	127.3	24	48.3	22.9	79	25	16	124.2
0	NOME	2.67	1	2017	3-6	1	0	0	0.84	0.339943	115	13	0	0	0	444.2	9.1	127.3	24	48.3	22.9	79	25	16	124.2
0	NOME	2.67	1	2017	3-6	1	0	0	0.84	0.339943	115	13	0	0	0	444.2	9.1	127.3	24	48.3	22.9	79	25	16	124.2
0	NOME	2.67	1	2017	3-6	1	0	0	0.84	0.339943	115	13	0	0	0	444.2	9.1	127.3	24	48.3	22.9	79	25	16	124.2
0	NOME	2.67	1	2017	3-6	1	0	0	0.84	0.339943	115	13	0	0	0	444.2	9.1	127.3	24	48.3	22.9	79	25	16	124.2
0	NOME	2.67	1	2017	3-6	1	0	0	0.84	0.339943	115	13	0	0	0	444.2	9.1	127.3	24	48.3	22.9	79	25	16	124.2
0	NOME	2.67	1	2017	3-6	1	0	0	0.84	0.339943	115	13	0	0	0	444.2	9.1	127.3	24	48.3	22.9	79	25	16	124.2
0	NOME	2.67	1	2017	3-6	1	0	0	0.84	0.339943	115	13	0	0	0	444.2	9.1	127.3	24	48.3	22.9	79	25	16	124.2
0	NOME	2.67	1	2017	3-6	1	0	0	0.84	0.339943	115	13	0	0	0	444.2	9.1	127.3	24	48.3	22.9	79	25	16	124.2
0	NOME	2.67	1	2017	3-6	1	0	0	0.84	0.339943	115	13	0	0	0	444.2	9.1	127.3	24	48.3	22.9	79	25	16	124.2
0	NOME	2.67	1	2017	3-6	1	0	0	0.84	0.339943	115	13	0	0	0	444.2	9.1	127.3	24	48.3	22.9	79	25	16	124.2
0	NOME	2.67	1	2017	3-6	1	0	0	0.84	0.339943	115	13	0	0	0	444.2	9.1	127.3	24	48.3	22.9	79	25	16	124.2
0	NOME	2.67	1	2017	3-6	1	0	0	0.84	0.339943	115	13	0	0	0	444.2	9.1	127.3	24	48.3	22.9	79	25	16	124.2
0	NOME	2.67	1	2017	3-6	1	0	0	0.84	0.339943	115	13	0	0	0	444.2	9.1	127.3	24	48.3	22.9	79	25	16	124.2
0	NOME	2.67	1	2017	7-10	2	0	0	0.84	0.339943	116	14	0	0	0	444.2	9.1	127.3	24	48.3	22.9	79	25	16	124.2
0	NOME	2.67	1	2017	7-10	2	0	0	0.84	0.339943	116	14	0	0	0	444.2	9.1	127.3	24	48.3	22.9	79	25	16	124.2
0	NOME	2.67	1	2018	7-10	2	0	0	0.89	0.360178	128	26	0	0	0	570.5	7.3	223	23.7	124.7	24	98.3	23.4	48.3	127.3
1	NOME	2.67	1	2018	7-10	2	0	0	0.89	0.360178	128	26	0	0	0	570.5	7.3	223	23.7	124.7	24	98.3	23.4	48.3	127.3
0	NOME	2.67	1	2019	3-6	0	0.74	0.299474	1.05	0.424929	0	37	0	0	0	702.1	6.5	252.2	22.7	114.3	21.2	137.9	24.3	124.7	223
0	NOME	2.67	1	2019	3-6	0	0.74	0.299474	1.05	0.424929	0	37	0	0	0	702.1	6.5	252.2	22.7	114.3	21.2	137.9	24.3	124.7	223
0	NOME	2.67	1	2019	3-6	0	0.74	0.299474	1.05	0.424929	0	37	0	0	0	702.1	6.5	252.2	22.7	114.3	21.2	137.9	24.3	124.7	223
0	NOME	2.67	1	2019	3-6	0	0.74	0.299474	1.05	0.424929	0	37	0	0	0	702.1	6.5	252.2	22.7	114.3	21.2	137.9	24.3	124.7	223
0	NOME	2.67	1	2019	3-6	0	0.74	0.299474	1.05	0.424929	0	37	0	0	0	702.1	6.5	252.2	22.7	114.3	21.2	137.9	24.3	124.7	223
0	NOME	2.67	1	2019	3-6	0	0.74	0.299474	1.05	0.424929	0	37	0	0	0	702.1	6.5	252.2	22.7	114.3	21.2	137.9	24.3	124.7	223
0	NOME	2.67	1	2019	7-10	1	0	0	1.81	0.732497	1	38	1	1	0	702.1	6.5	252.2	22.7	114.3	21.2	137.9	24.3	124.7	223
0	NOME	2.67	1	2019	7-10	1	0	0	1.81	0.732497	1	38	1	1	0	702.1	6.5	252.2	22.7	114.3	21.2	137.9	24.3	124.7	223
0	OFPA	3	2	2003	7-10	1	0	0	2.16	0.87414	180	67	0	0	0	480.1	7.8	124.2	22.6	111.3	20.1	13	25.2	34.5	56.1
0	OFPA	3	2	2004	7-10	1	0	0	2.14	0.866046	180	79	1	1	1	378	8.2	173.7	20.9	43.2	19.7	130.6	22.2	111.3	124.2
0	OFPA	3	2	2004	7-10	1	0	0	2.14	0.866046	180	79	1	1	1	378	8.2	173.7	20.9	43.2	19.7	130.6	22.2	111.3	124.2
0	OFPA	3	2	2007	3-6	0	1.5	0.607042	1.86	0.752732	180	1	8	0	6	709.7	7.6	182.4	23	72.6	21.4	109.7	24.6	91.4	152.7
0	OFPA	3	2	2007	3-6	0	1.5	0.607042	1.86	0.752732	180	1	8	0	6	709.7	7.6	182.4	23	72.6	21.4	109.7	24.6	91.4	152.7
0	OFPA	3	2	2007	3-6	0	1.5	0.607042	1.86	0.752732	180	1	8	0	6	709.7	7.6	182.4	23	72.6	21.4	109.7	24.6	91.4	152.7
0	OFPA	3	2	2007	3-6	0	1.5	0.607042	1.86	0.752732	180	1	8	0	6	709.7	7.6	182.4	23	72.6	21.4	109.7	24.6	91.4	152.7
0	OFPA	3	2	2007	3-6	0	1.5	0.607042	1.86	0.752732	180	1	8	0	6	709.7	7.6	182.4	23	72.6	21.4	109.7	24.6	91.4	152.7
0	OFPA	3	2	2007	3-6	0	1.5	0.607042	1.86	0.752732	180	1	8	0	6	709.7	7.6	182.4	23	72.6	21.4	109.7	24.6	91.4	152.7
0	OFPA	3	2	2007	3-6	0	1.5	0.607042	1.86	0.752732	180	1	8	0	6	709.7	7.6	182.4	23	72.6	21.4	109.7	24.6	91.4	152.7
0	OFPA	3	2	2007	3-6	0	1.5	0.607042	1.86	0.752732	180	1	8	0	6	709.7	7.6	182.4	23	72.6	21.4	109.7	24.6	91.4	152.7
0	OFPA	3	2	2007	3-6	0	1.5	0.607042	1.86	0.752732	180	1	8	0	6	709.7	7.6	182.4	23	72.6	21.4	109.7	24.6	91.4	152.7
0	OFPA	3	2	2007	3-6	0	1.5	0.607042	1.86	0.752732	180	1	8	0	6	709.7	7.6	182.4	23	72.6	21.4	109.7	24.6	91.4	152.7
0	WRBS	2.33	1	2002	3-6	9	0	0	0.84	0.339943	180	1		0	0	369.8	8.5	56.1	25.3	34.5	24.5	21.6	26.2	27.2	104.6
0	WRBS	2.33	1	2002	3-6	9	0	0	0.84	0.339943	180	1		0	0	369.8	8.5	56.1	25.3	34.5	24.5	21.6	26.2	27.2	104.6
0	WRBS	2.33	1	2002	3-6	9	0	0	0.84	0.339943	180	1		0	0	369.8	8.5	56.1	25.3	34.5	24.5	21.6	26.2	27.2	104.6
0	WRBS	2.33	1	2002	3-6	9	0	0	0.84	0.339943	180	1		0	0	369.8	8.5	56.1	25.3	34.5	24.5	21.6	26.2	27.2	104.6
0	WRBS	2.33	1	2002	3-6	9	0	0	0.84	0.339943	180	1		0	0	369.8	8.5	56.1	25.3	34.5	24.5	21.6	26.2	27.2	104.6
0	WRBS	2.33	1	2002	3-6	9	0	0	0.84	0.339943	180	1		0	0	369.8	8.5	56.1	25.3	34.5	24.5	21.6	26.2	27.2	104.6
0	WRBS	2.33	1	2002	3-6	9	0	0	0.84	0.339943	180	1		0	0	369.8	8.5	56.1	25.3	34.5	24.5	21.6	26.2	27.2	104.6
0	WRBS	2.33	1	2002	3-6	9	0	0	0.84	0.339943	180	1		0	0	369.8	8.5	56.1	25.3	34.5	24.5	21.6	26.2	27.2	104.6
0	WRBS	2.33	1	2002	3-6	9	0	0	0.84	0.339943	180	1		0	0	369.8	8.5	56.1	25.3	34.5	24.5	21.6	26.2	27.2	104.6
0	WRBS	2.33	1	2002	3-6	9	0	0	0.84	0.339943	180	1		0	0	369.8	8.5	56.1	25.3	34.5	24.5	21.6	26.2	27.2	104.6
0	WRBS	2.33	1	2002	3-6	9	0	0	0.84	0.339943	180	1		0	0	369.8	8.5	56.1	25.3	34.5	24.5	21.6	26.2	27.2	104.6
0	WRBS	2.33	1	2002	7-10	10	0	0	0.84	0.339943	180	2	0	0	0	369.8	8.5	56.1	25.3	34.5	24.5	21.6	26.2	27.2	104.6
0	WRBS	2.33	1	2002	7-10	10	0	0	0.84	0.339943	180	2	0	0	0	369.8	8.5	56.1	25.3	34.5	24.5	21.6	26.2	27.2	104.6
0	WRBS	2.33	1	2002	7-10	10	0	0	0.84	0.339943	180	2	0	0	0	369.8	8.5	56.1	25.3	34.5	24.5	21.6	26.2	27.2	104.6
0	WRBS	2.33	1	2002	7-10	10	0	0	0.84	0.339943	180	2	0	0	0	369.8	8.5	56.1	25.3	34.5	24.5	21.6	26.2	27.2	104.6
0	WRBS	2.33	1	2002	7-10	10	0	0	0.84	0.339943	180	2	0	0	0	369.8	8.5	56.1	25.3	34.5	24.5	21.6	26.2	27.2	104.6
0	WRBS	2.33	1	2002	7-10	10	0	0	0.84	0.339943	180	2	0	0	0	369.8	8.5	56.1	25.3	34.5	24.5	21.6	26.2	27.2	104.6
0	WRBS	2.33	1	2002	7-10	10	0	0	0.84	0.339943	180	2	0	0	0	369.8	8.5	56.1	25.3	34.5	24.5	21.6	26.2	27.2	104.6
0	WRBS	2.33	1	2003	3-6	0	2	0.809389	1.24	0.501821	180	1	2	0	0	480.1	7.8	124.2	22.6	111.3	20.1	13	25.2	34.5	56.1
0	WRBS	2.33	1	2003	3-6	0	2	0.809389	1.24	0.501821	180	1	2	0	0	480.1	7.8	124.2	22.6	111.3	20.1	13	25.2	34.5	56.1
0	WRBS	2.33	1	2003	3-6	0	2	0.809389	1.24	0.501821	180	1	2	0	0	480.1	7.8	124.2	22.6	111.3	20.1	13	25.2	34.5	56.1
0	WRBS	2.33	1	2003	3-6	0	2	0.809389	1.24	0.501821	180	1	2	0	0	480.1	7.8	124.2	22.6	111.3	20.1	13	25.2	34.5	56.1
0	WRBS	2.33	1	2003	3-6	0	2	0.809389	1.24	0.501821	180	1	2	0	0	480.1	7.8	124.2	22.6	111.3	20.1	13	25.2	34.5	56.1
0	WRBS	2.33	1	2003	7-10	0	2	0.809389	1.24	0.501821	180	2	0	0	0	480.1	7.8	124.2	22.6	111.3	20.1	13	25.2	34.5	56.1
0	WRBS	2.33	1	2003	7-10	0	2	0.809389	1.24	0.501821	180	2	0	0	0	480.1	7.8	124.2	22.6	111.3	20.1	13	25.2	34.5	56.1
0	WRBS	2.33	1	2003	7-10	0	2	0.809389	1.24	0.501821	180	2	0	0	0	480.1	7.8	124.2	22.6	111.3	20.1	13	25.2	34.5	56.1
0	WRBS	2.33	1	2003	7-10	0	2	0.809389	1.24	0.501821	180	2	0	0	0	480.1	7.8	124.2	22.6	111.3	20.1	13	25.2	34.5	56.1
0	WRBS	2.33	1	2003	7-10	0	2	0.809389	1.24	0.501821	180	2	0	0	0	480.1	7.8	124.2	22.6	111.3	20.1	13	25.2	34.5	56.1
1	WRBS	2.33	1	2003	7-10	0	2	0.809389	1.24	0.501821	180	2	0	0	0	480.1	7.8	124.2	22.6	111.3	20.1	13	25.2	34.5	56.1
0	WRBS	2.33	1	2004	3-6	10	0	0	0.78	0.315662	180	13	2	0	1	378	8.2	173.7	20.9	43.2	19.7	130.6	22.2	111.3	124.2
0	WRBS	2.33	1	2006	3-6	8	0	0	0.92	0.372319	180	37	8	0	4	379.7	9.3	152.7	24.1	91.4	22.9	61.2	25.3	112	155.4
0	WRBS	2.33	1	2006	3-6	8	0	0	0.92	0.372319	180	37	8	0	4	379.7	9.3	152.7	24.1	91.4	22.9	61.2	25.3	112	155.4
0	WRBS	2.33	1	2006	3-6	8	0	0	0.92	0.372319	180	37	8	0	4	379.7	9.3	152.7	24.1	91.4	22.9	61.2	25.3	112	155.4
0	WRBS	2.33	1	2006	3-6	8	0	0	0.92	0.372319	180	37	8	0	4	379.7	9.3	152.7	24.1	91.4	22.9	61.2	25.3	112	155.4
0	WRBS	2.33	1	2006	3-6	8	0	0	0.92	0.372319	180	37	8	0	4	379.7	9.3	152.7	24.1	91.4	22.9	61.2	25.3	112	155.4
0	WRBS	2.33	1	2006	3-6	8	0	0	0.92	0.372319	180	37	8	0	4	379.7	9.3	152.7	24.1	91.4	22.9	61.2	25.3	112	155.4
0	WRBS	2.33	1	2006	3-6	8	0	0	0.92	0.372319	180	37	8	0	4	379.7	9.3	152.7	24.1	91.4	22.9	61.2	25.3	112	155.4
0	WRBS	2.33	1	2006	3-6	8	0	0	0.92	0.372319	180	37	8	0	4	379.7	9.3	152.7	24.1	91.4	22.9	61.2	25.3	112	155.4
0	WRBS	2.33	1	2006	7-10	9	0	0	0.92	0.372319	180	38	0	0	0	379.7	9.3	152.7	24.1	91.4	22.9	61.2	25.3	112	155.4
0	WRMP	3	1	2005	3-6	8	0	0	0.92	0.372319	180	37	11	0	4	510.5	8.4	155.4	23.7	112	22.3	43.4	25	43.2	173.7
0	WRMP	3	1	2005	3-6	8	0	0	0.92	0.372319	180	37	11	0	4	510.5	8.4	155.4	23.7	112	22.3	43.4	25	43.2	173.7
0	WRMP	3	1	2005	3-6	8	0	0	0.92	0.372319	180	37	11	0	4	510.5	8.4	155.4	23.7	112	22.3	43.4	25	43.2	173.7
0	WRMP	3	1	2005	3-6	8	0	0	0.92	0.372319	180	37	11	0	4	510.5	8.4	155.4	23.7	112	22.3	43.4	25	43.2	173.7
0	WRMP	3	1	2005	7-10	9	0	0	0.92	0.372319	180	38	0	0	0	510.5	8.4	155.4	23.7	112	22.3	43.4	25	43.2	173.7
0	WRMP	3	1	2005	7-10	9	0	0	0.92	0.372319	180	38	0	0	0	510.5	8.4	155.4	23.7	112	22.3	43.4	25	43.2	173.7
0	WRMP	3	1	2005	7-10	9	0	0	0.92	0.372319	180	38	0	0	0	510.5	8.4	155.4	23.7	112	22.3	43.4	25	43.2	173.7
0	WRPM	3	2	2002	3-6	180	0	0	0	0	10	25	0	0	0	369.8	8.5	56.1	25.3	34.5	24.5	21.6	26.2	27.2	104.6
0	WRPM	3	2	2002	3-6	180	0	0	0	0	10	25	0	0	0	369.8	8.5	56.1	25.3	34.5	24.5	21.6	26.2	27.2	104.6
0	WRPM	3	2	2002	7-10	180	0	0	0	0	11	26	0	0	0	369.8	8.5	56.1	25.3	34.5	24.5	21.6	26.2	27.2	104.6
0	WRPM	3	2	2002	7-10	180	0	0	0	0	11	26	0	0	0	369.8	8.5	56.1	25.3	34.5	24.5	21.6	26.2	27.2	104.6
0	WRPM	3	2	2003	3-6	180	0	0	0	0	10	37	1	1	0	480.1	7.8	124.2	22.6	111.3	20.1	13	25.2	34.5	56.1
0	WRPM	3	2	2003	3-6	180	0	0	0	0	10	37	1	1	0	480.1	7.8	124.2	22.6	111.3	20.1	13	25.2	34.5	56.1
0	WRPM	3	2	2003	3-6	180	0	0	0	0	10	37	1	1	0	480.1	7.8	124.2	22.6	111.3	20.1	13	25.2	34.5	56.1
0	WRPM	3	2	2003	3-6	180	0	0	0	0	10	37	1	1	0	480.1	7.8	124.2	22.6	111.3	20.1	13	25.2	34.5	56.1
0	WRPM	3	2	2005	3-6	180	0	0	0	0	22	61	8	0	4	510.5	8.4	155.4	23.7	112	22.3	43.4	25	43.2	173.7
0	WRPM	3	2	2005	3-6	180	0	0	0	0	22	61	8	0	4	510.5	8.4	155.4	23.7	112	22.3	43.4	25	43.2	173.7
0	WRPM	3	2	2006	3-6	180	0	0	0	0	34	73	11	0	5	379.7	9.3	152.7	24.1	91.4	22.9	61.2	25.3	112	155.4
0	WRPM	3	2	2006	3-6	180	0	0	0	0	34	73	11	0	5	379.7	9.3	152.7	24.1	91.4	22.9	61.2	25.3	112	155.4
0	WRPM	3	2	2006	3-6	180	0	0	0	0	34	73	11	0	5	379.7	9.3	152.7	24.1	91.4	22.9	61.2	25.3	112	155.4
0	WRPM	3	2	2006	3-6	180	0	0	0	0	34	73	11	0	5	379.7	9.3	152.7	24.1	91.4	22.9	61.2	25.3	112	155.4
0	WRPM	3	2	2006	3-6	180	0	0	0	0	34	73	11	0	5	379.7	9.3	152.7	24.1	91.4	22.9	61.2	25.3	112	155.4
0	WRPM	3	2	2006	3-6	180	0	0	0	0	34	73	11	0	5	379.7	9.3	152.7	24.1	91.4	22.9	61.2	25.3	112	155.4
0	WRPM	3	2	2006	3-6	180	0	0	0	0	34	73	11	0	5	379.7	9.3	152.7	24.1	91.4	22.9	61.2	25.3	112	155.4
0	WRPM	3	2	2006	3-6	180	0	0	0	0	34	73	11	0	5	379.7	9.3	152.7	24.1	91.4	22.9	61.2	25.3	112	155.4
0	WRPM	3	2	2006	3-6	180	0	0	0	0	34	73	11	0	5	379.7	9.3	152.7	24.1	91.4	22.9	61.2	25.3	112	155.4
0	WRPM	3	2	2006	3-6	180	0	0	0	0	34	73	11	0	5	379.7	9.3	152.7	24.1	91.4	22.9	61.2	25.3	112	155.4
0	WRPM	3	2	2006	3-6	180	0	0	0	0	34	73	11	0	5	379.7	9.3	152.7	24.1	91.4	22.9	61.2	25.3	112	155.4
0	WRPM	3	2	2006	3-6	180	0	0	0	0	34	73	11	0	5	379.7	9.3	152.7	24.1	91.4	22.9	61.2	25.3	112	155.4
0	WRPM	3	2	2006	3-6	180	0	0	0	0	34	73	11	0	5	379.7	9.3	152.7	24.1	91.4	22.9	61.2	25.3	112	155.4
0	WRPM	3	2	2006	3-6	180	0	0	0	0	34	73	11	0	5	379.7	9.3	152.7	24.1	91.4	22.9	61.2	25.3	112	155.4
0	WRPM	3	2	2006	3-6	180	0	0	0	0	34	73	11	0	5	379.7	9.3	152.7	24.1	91.4	22.9	61.2	25.3	112	155.4
0	WRPM	3	2	2006	3-6	180	0	0	0	0	34	73	11	0	5	379.7	9.3	152.7	24.1	91.4	22.9	61.2	25.3	112	155.4
0	WRPM	3	2	2006	7-10	180	0	0	0	0	35	74	0	0	0	379.7	9.3	152.7	24.1	91.4	22.9	61.2	25.3	112	155.4
0	WRPM	3	2	2017	3-6	67	0	0	0	0	9	110	2	0	2	444.2	9.1	127.3	24	48.3	22.9	79	25	16	124.2
0	WRPM	3	2	2017	3-6	67	0	0	0	0	9	110	2	0	2	444.2	9.1	127.3	24	48.3	22.9	79	25	16	124.2
0	WRPM	3	2	2017	3-6	67	0	0	0	0	9	110	2	0	2	444.2	9.1	127.3	24	48.3	22.9	79	25	16	124.2
0	WRPM	3	2	2017	7-10	68	0	0	0	0	10	111	1	0	1	444.2	9.1	127.3	24	48.3	22.9	79	25	16	124.2
0	WRPM	3	2	2018	3-6	79	0	0	0	0	9	1	0	0	0	570.5	7.3	223	23.7	124.7	24	98.3	23.4	48.3	127.3
0	WRPM	3	2	2018	3-6	79	0	0	0	0	9	1	0	0	0	570.5	7.3	223	23.7	124.7	24	98.3	23.4	48.3	127.3
0	WRPM	3	2	2018	7-10	80	0	0	0	0	10	2	0	0	0	570.5	7.3	223	23.7	124.7	24	98.3	23.4	48.3	127.3
0	WRPM	3	2	2019	7-10	92	0	0	0	0	10	14	0	0	0	702.1	6.5	252.2	22.7	114.3	21.2	137.9	24.3	124.7	223
0	WRPM	3	2	2019	7-10	92	0	0	0	0	10	14	0	0	0	702.1	6.5	252.2	22.7	114.3	21.2	137.9	24.3	124.7	223
0	WRPM	3	2	2019	7-10	92	0	0	0	0	10	14	0	0	0	702.1	6.5	252.2	22.7	114.3	21.2	137.9	24.3	124.7	223

## Sheet: BHCO_abundance
abundance	unique.adults	unique.juveniles	recaptures.adults	recaptures.juveniles	site	mesic	land.use	year	period	graze.months	current(aum/ac)	current.stocking.rate	history(aum/ac)	grazing.history	hay.months	burn.months	precip.aug.may	avg.temp.aug.may	precip.june.july	avg.temp.june.july	precip.june	avg.temp.june	precip.july	avg.temp.july	precip.june.previous.year	precip.june.july.previous.year
0	0	0	0	0	CRME	3	2	2003	3-6	180	0	0	0	0	180	180	480.1	7.8	124.2	22.6	111.3	20.1	13	25.2	34.5	56.1
0	0	0	0	0	CRME	3	2	2003	7-10	180	0	0	0	0	180	180	480.1	7.8	124.2	22.6	111.3	20.1	13	25.2	34.5	56.1
4.34028e-05	3	0	0	0	CRME	3	2	2004	3-6	180	0	0	0	0	180	1	378	8.2	173.7	20.9	43.2	19.7	130.6	22.2	111.3	124.2
0	0	0	0	0	CRME	3	2	2004	7-10	180	0	0	0	0	180	2	378	8.2	173.7	20.9	43.2	19.7	130.6	22.2	111.3	124.2
4.96032e-05	1	0	0	0	CRME	3	2	2017	3-6	10	0	0	0.23	0.0930797	180	158	444.2	9.1	127.3	24	48.3	22.9	79	25	16	124.2
0	0	0	0	0	CRME	3	2	2017	7-10	11	0	0	0.23	0.0930797	180	159	444.2	9.1	127.3	24	48.3	22.9	79	25	16	124.2
4.96032e-05	1	0	0	0	CRME	3	2	2018	3-6	1	0	0	0.197	0.0797248	180	170	570.5	7.3	223	23.7	124.7	24	98.3	23.4	48.3	127.3
0	0	0	0	0	CRME	3	2	2018	7-10	2	0	0	0.197	0.0797248	180	171	570.5	7.3	223	23.7	124.7	24	98.3	23.4	48.3	127.3
0	0	0	0	0	CRME	3	2	2019	3-6	0	0.16	0.0647511	0.214	0.0866046	180	180	702.1	6.5	252.2	22.7	114.3	21.2	137.9	24.3	124.7	223
0	0	0	0	0	CRME	3	2	2019	7-10	0	0.36	0.14569	0.227	0.0918656	180	180	702.1	6.5	252.2	22.7	114.3	21.2	137.9	24.3	124.7	223
0.000156732	12	0	1	0	FETW	3.67	1	2005	3-6	21	0	0	0.834	0.337515	180	1	510.5	8.4	155.4	23.7	112	22.3	43.4	25	43.2	173.7
2.41127e-05	2	2	0	0	FETW	3.67	1	2005	7-10	22	0	0	0.834	0.337515	180	2	510.5	8.4	155.4	23.7	112	22.3	43.4	25	43.2	173.7
8.43943e-05	6	0	1	0	FETW	3.67	1	2006	3-6	0	2.2	0.890328	1.12	0.453258	180	13	379.7	9.3	152.7	24.1	91.4	22.9	61.2	25.3	112	155.4
0	0	0	0	0	FETW	3.67	1	2006	7-10	1	0	0	1.12	0.453258	180	14	379.7	9.3	152.7	24.1	91.4	22.9	61.2	25.3	112	155.4
7.89141e-05	4	0	2	0	FETW	3.67	1	2007	3-6	9	0	0	0.68	0.275192	180	25	709.7	7.6	182.4	23	72.6	21.4	109.7	24.6	91.4	152.7
0	0	4	0	0	FETW	3.67	1	2007	7-10	0	1.7	0.687981	1.02	0.412788	180	26	709.7	7.6	182.4	23	72.6	21.4	109.7	24.6	91.4	152.7
6.61376e-05	4	0	0	0	FONE	2	1	2003	3-6	9	0	0	0.714	0.288952	180	25	480.1	7.8	124.2	22.6	111.3	20.1	13	25.2	34.5	56.1
0	0	0	0	0	FONE	2	1	2003	7-10	10	0	0	0.714	0.288952	180	26	480.1	7.8	124.2	22.6	111.3	20.1	13	25.2	34.5	56.1
0.000115741	7	0	1	0	FONE	2	1	2004	3-6	21	0	0	0.56	0.226629	180	37	378	8.2	173.7	20.9	43.2	19.7	130.6	22.2	111.3	124.2
0	0	0	0	0	FONE	2	1	2004	7-10	22	0	0	0.56	0.226629	180	38	378	8.2	173.7	20.9	43.2	19.7	130.6	22.2	111.3	124.2
7.2338e-05	6	0	0	0	FONE	2	1	2005	3-6	0	2.4	0.971267	1.04	0.420882	180	1	510.5	8.4	155.4	23.7	112	22.3	43.4	25	43.2	173.7
3.6169e-05	3	2	0	0	FONE	2	1	2005	7-10	1	0	0	1.04	0.420882	180	2	510.5	8.4	155.4	23.7	112	22.3	43.4	25	43.2	173.7
3.6169e-05	3	0	0	0	FONE	2	1	2006	3-6	7	0	0	0.72	0.29138	180	13	379.7	9.3	152.7	24.1	91.4	22.9	61.2	25.3	112	155.4
2.41127e-05	2	1	0	0	FONE	2	1	2006	7-10	0	1.2	0.485633	0.96	0.388507	180	14	379.7	9.3	152.7	24.1	91.4	22.9	61.2	25.3	112	155.4
0.000105219	7	1	1	0	FONE	2	1	2007	3-6	9	0	0	0.72	0.29138	180	25	709.7	7.6	182.4	23	72.6	21.4	109.7	24.6	91.4	152.7
5.26094e-05	4	4	0	0	FONE	2	1	2007	7-10	10	0	0	0.72	0.29138	180	26	709.7	7.6	182.4	23	72.6	21.4	109.7	24.6	91.4	152.7
0	0	0	0	0	MOFE	2	1	2002	3-6	180	0	0	0	0	10	25	369.8	8.5	56.1	25.3	34.5	24.5	21.6	26.2	27.2	104.6
0	0	0	0	0	MOFE	2	1	2002	7-10	180	0	0	0	0	11	26	369.8	8.5	56.1	25.3	34.5	24.5	21.6	26.2	27.2	104.6
0.00014881	9	0	0	0	MOFE	2	1	2003	3-6	180	0	0	0	0	10	37	480.1	7.8	124.2	22.6	111.3	20.1	13	25.2	34.5	56.1
0	0	0	0	0	MOFE	2	1	2003	7-10	180	0	0	0	0	11	38	480.1	7.8	124.2	22.6	111.3	20.1	13	25.2	34.5	56.1
7.2338e-05	5	1	0	0	MOFE	2	1	2004	3-6	180	0	0	0	0	22	49	378	8.2	173.7	20.9	43.2	19.7	130.6	22.2	111.3	124.2
2.89352e-05	1	0	1	0	MOFE	2	1	2004	7-10	180	0	0	0	0	23	50	378	8.2	173.7	20.9	43.2	19.7	130.6	22.2	111.3	124.2
2.41127e-05	2	0	0	0	MOFE	2	1	2005	3-6	180	0	0	0	0	34	61	510.5	8.4	155.4	23.7	112	22.3	43.4	25	43.2	173.7
0	0	0	0	0	MOFE	2	1	2005	7-10	180	0	0	0	0	35	62	510.5	8.4	155.4	23.7	112	22.3	43.4	25	43.2	173.7
1.20563e-05	0	0	1	0	MOFE	2	1	2006	3-6	180	0	0	0	0	46	1	379.7	9.3	152.7	24.1	91.4	22.9	61.2	25.3	112	155.4
1.20563e-05	1	0	0	0	MOFE	2	1	2006	7-10	180	0	0	0	0	47	2	379.7	9.3	152.7	24.1	91.4	22.9	61.2	25.3	112	155.4
0.000210438	14	0	2	0	MOFE	2	1	2007	3-6	180	0	0	0	0	58	13	709.7	7.6	182.4	23	72.6	21.4	109.7	24.6	91.4	152.7
0.000131524	10	9	0	0	MOFE	2	1	2007	7-10	180	0	0	0	0	59	14	709.7	7.6	182.4	23	72.6	21.4	109.7	24.6	91.4	152.7
0.000297619	6	0	0	0	MOFE	2	1	2017	3-6	7	0	0	0.564	0.228248	180	49	444.2	9.1	127.3	24	48.3	22.9	79	25	16	124.2
0.000248016	5	2	0	0	MOFE	2	1	2017	7-10	8	0	0	0.564	0.228248	180	50	444.2	9.1	127.3	24	48.3	22.9	79	25	16	124.2
9.92063e-05	2	0	0	0	MOFE	2	1	2018	3-6	0	0.88	0.356131	0.904	0.365844	180	61	570.5	7.3	223	23.7	124.7	24	98.3	23.4	48.3	127.3
4.96032e-05	1	1	0	0	MOFE	2	1	2018	7-10	0	0.46	0.186159	0.862	0.348847	180	62	570.5	7.3	223	23.7	124.7	24	98.3	23.4	48.3	127.3
0	0	0	0	0	MOFE	2	1	2019	3-6	0	0.48	0.194253	1.023	0.414002	180	73	702.1	6.5	252.2	22.7	114.3	21.2	137.9	24.3	124.7	223
0	0	0	0	0	MOFE	2	1	2019	7-10	1	0	0	1.023	0.414002	180	74	702.1	6.5	252.2	22.7	114.3	21.2	137.9	24.3	124.7	223
0	0	0	0	0	MOFF	2.33	2	2002	3-6	23	0	0	0	0	180	26	369.8	8.5	56.1	25.3	34.5	24.5	21.6	26.2	27.2	104.6
0	0	0	0	0	MOFF	2.33	2	2002	7-10	24	0	0	0	0	180	27	369.8	8.5	56.1	25.3	34.5	24.5	21.6	26.2	27.2	104.6
7.2338e-05	5	0	0	0	MOFF	2.33	2	2004	3-6	0	2.6	1.05221	0.34	0.137596	180	50	378	8.2	173.7	20.9	43.2	19.7	130.6	22.2	111.3	124.2
2.89352e-05	2	0	0	0	MOFF	2.33	2	2004	7-10	1	0	0	0.54	0.218535	180	51	378	8.2	173.7	20.9	43.2	19.7	130.6	22.2	111.3	124.2
0.000120563	10	2	0	0	MOFF	2.33	2	2005	3-6	7	0	0	0.54	0.218535	180	62	510.5	8.4	155.4	23.7	112	22.3	43.4	25	43.2	173.7
2.41127e-05	2	1	0	0	MOFF	2.33	2	2005	7-10	0	1.5	0.607042	0.54	0.218535	180	63	510.5	8.4	155.4	23.7	112	22.3	43.4	25	43.2	173.7
6.02816e-05	5	0	0	0	MOFF	2.33	2	2006	3-6	9	0	0	0.88	0.356131	180	2	379.7	9.3	152.7	24.1	91.4	22.9	61.2	25.3	112	155.4
1.20563e-05	1	1	0	0	MOFF	2.33	2	2006	7-10	10	0	0	0.88	0.356131	180	3	379.7	9.3	152.7	24.1	91.4	22.9	61.2	25.3	112	155.4
0.000236742	15	3	3	0	MOFF	2.33	2	2007	3-6	0	1.7	0.687981	0.88	0.356131	180	1	709.7	7.6	182.4	23	72.6	21.4	109.7	24.6	91.4	152.7
1.31524e-05	1	3	0	0	MOFF	2.33	2	2007	7-10	1	0	0	1.22	0.493727	180	2	709.7	7.6	182.4	23	72.6	21.4	109.7	24.6	91.4	152.7
1.65344e-05	1	0	0	0	MOFR	3	1	2003	3-6	9	0	0	0.488	0.197491	180	13	480.1	7.8	124.2	22.6	111.3	20.1	13	25.2	34.5	56.1
0	0	0	0	0	MOFR	3	1	2003	7-10	10	0	0	0.488	0.197491	180	14	480.1	7.8	124.2	22.6	111.3	20.1	13	25.2	34.5	56.1
0.000204958	17	0	0	0	MOFR	3	1	2005	3-6	7	0	0	0.54	0.218535	180	37	510.5	8.4	155.4	23.7	112	22.3	43.4	25	43.2	173.7
0	0	1	0	0	MOFR	3	1	2005	7-10	0	1.6	0.647511	0.86	0.348037	180	38	510.5	8.4	155.4	23.7	112	22.3	43.4	25	43.2	173.7
0.000144676	10	1	2	0	MOFR	3	1	2006	3-6	9	0	0	0.86	0.348037	180	49	379.7	9.3	152.7	24.1	91.4	22.9	61.2	25.3	112	155.4
1.20563e-05	1	2	0	0	MOFR	3	1	2006	7-10	10	0	0	0.86	0.348037	180	50	379.7	9.3	152.7	24.1	91.4	22.9	61.2	25.3	112	155.4
6.57618e-05	4	1	1	0	MOFR	3	1	2007	3-6	21	0	0	0.66	0.267098	180	61	709.7	7.6	182.4	23	72.6	21.4	109.7	24.6	91.4	152.7
3.94571e-05	3	3	0	0	MOFR	3	1	2007	7-10	22	0	0	0.66	0.267098	180	62	709.7	7.6	182.4	23	72.6	21.4	109.7	24.6	91.4	152.7
0	0	0	0	0	MOFN	2.5	1	2002	3-6	7	0	0	0.84	0.339943	180	73	369.8	8.5	56.1	25.3	34.5	24.5	21.6	26.2	27.2	104.6
0	0	0	0	0	MOFN	2.5	1	2002	7-10	8	0	0	0.84	0.339943	180	74	369.8	8.5	56.1	25.3	34.5	24.5	21.6	26.2	27.2	104.6
5.78704e-05	4	0	0	0	MOFN	2.5	1	2004	3-6	7	0	0	0.914	0.369891	180	13	378	8.2	173.7	20.9	43.2	19.7	130.6	22.2	111.3	124.2
2.89352e-05	2	1	0	0	MOFN	2.5	1	2004	7-10	0	1.5	0.607042	1.214	0.491299	180	14	378	8.2	173.7	20.9	43.2	19.7	130.6	22.2	111.3	124.2
7.2338e-05	6	0	0	0	MOFN	2.5	1	2005	3-6	9	0	0	1.06	0.428976	180	25	510.5	8.4	155.4	23.7	112	22.3	43.4	25	43.2	173.7
2.41127e-05	2	2	0	0	MOFN	2.5	1	2005	7-10	10	0	0	1.06	0.428976	180	26	510.5	8.4	155.4	23.7	112	22.3	43.4	25	43.2	173.7
8.43943e-05	6	0	1	0	MOFN	2.5	1	2006	3-6	21	0	0	0.74	0.299474	180	37	379.7	9.3	152.7	24.1	91.4	22.9	61.2	25.3	112	155.4
1.20563e-05	1	0	0	0	MOFN	2.5	1	2006	7-10	22	0	0	0.74	0.299474	180	38	379.7	9.3	152.7	24.1	91.4	22.9	61.2	25.3	112	155.4
0	0	0	0	0	MOFN	2.5	1	2007	3-6	0	1.7	0.687981	1.08	0.43707	180	1	709.7	7.6	182.4	23	72.6	21.4	109.7	24.6	91.4	152.7
3.94571e-05	3	0	0	0	MOFN	2.5	1	2007	7-10	1	0	0	1.08	0.43707	180	2	709.7	7.6	182.4	23	72.6	21.4	109.7	24.6	91.4	152.7
1.65344e-05	0	0	1	0	NOME	2.67	1	2003	3-6	180	0	0	0	0	46	37	480.1	7.8	124.2	22.6	111.3	20.1	13	25.2	34.5	56.1
0	0	0	0	0	NOME	2.67	1	2003	7-10	180	0	0	0	0	47	38	480.1	7.8	124.2	22.6	111.3	20.1	13	25.2	34.5	56.1
0.000115741	8	0	0	0	NOME	2.67	1	2004	3-6	180	0	0	0	0	58	1	378	8.2	173.7	20.9	43.2	19.7	130.6	22.2	111.3	124.2
0	0	0	0	0	NOME	2.67	1	2004	7-10	180	0	0	0	0	59	2	378	8.2	173.7	20.9	43.2	19.7	130.6	22.2	111.3	124.2
0.000144676	11	0	1	0	NOME	2.67	1	2005	3-6	180	0	0	0	0	10	13	510.5	8.4	155.4	23.7	112	22.3	43.4	25	43.2	173.7
1.20563e-05	1	0	0	0	NOME	2.67	1	2005	7-10	180	0	0	0	0	11	14	510.5	8.4	155.4	23.7	112	22.3	43.4	25	43.2	173.7
1.20563e-05	0	0	1	0	NOME	2.67	1	2006	3-6	180	0	0	0	0	10	25	379.7	9.3	152.7	24.1	91.4	22.9	61.2	25.3	112	155.4
1.20563e-05	1	0	0	0	NOME	2.67	1	2006	7-10	180	0	0	0	0	11	26	379.7	9.3	152.7	24.1	91.4	22.9	61.2	25.3	112	155.4
9.20665e-05	5	0	2	0	NOME	2.67	1	2007	3-6	0	1.5	0.607042	0.3	0.121408	10	2	709.7	7.6	182.4	23	72.6	21.4	109.7	24.6	91.4	152.7
0	0	0	0	0	NOME	2.67	1	2007	7-10	0	1.5	0.607042	0.3	0.121408	11	3	709.7	7.6	182.4	23	72.6	21.4	109.7	24.6	91.4	152.7
0	0	0	0	0	NOME	2.67	1	2017	3-6	1	0	0	0.84	0.339943	115	13	444.2	9.1	127.3	24	48.3	22.9	79	25	16	124.2
0	0	0	0	0	NOME	2.67	1	2017	7-10	2	0	0	0.84	0.339943	116	14	444.2	9.1	127.3	24	48.3	22.9	79	25	16	124.2
0.000198413	4	0	0	0	NOME	2.67	1	2018	3-6	1	0	0	0.89	0.360178	127	25	570.5	7.3	223	23.7	124.7	24	98.3	23.4	48.3	127.3
0	0	0	0	0	NOME	2.67	1	2018	7-10	2	0	0	0.89	0.360178	128	26	570.5	7.3	223	23.7	124.7	24	98.3	23.4	48.3	127.3
0	0	0	0	0	NOME	2.67	1	2019	3-6	0	0.74	0.299474	1.05	0.424929	0	37	702.1	6.5	252.2	22.7	114.3	21.2	137.9	24.3	124.7	223
4.96032e-05	1	1	0	0	NOME	2.67	1	2019	7-10	1	0	0	1.81	0.732497	1	38	702.1	6.5	252.2	22.7	114.3	21.2	137.9	24.3	124.7	223
0	0	0	0	0	WRBS	2.33	1	2002	3-6	9	0	0	0.84	0.339943	180	1	369.8	8.5	56.1	25.3	34.5	24.5	21.6	26.2	27.2	104.6
0	0	0	0	0	WRBS	2.33	1	2002	7-10	10	0	0	0.84	0.339943	180	2	369.8	8.5	56.1	25.3	34.5	24.5	21.6	26.2	27.2	104.6
3.30688e-05	2	0	0	0	WRBS	2.33	1	2003	3-6	0	2	0.809389	1.24	0.501821	180	1	480.1	7.8	124.2	22.6	111.3	20.1	13	25.2	34.5	56.1
0	0	0	0	0	WRBS	2.33	1	2003	7-10	0	2	0.809389	1.24	0.501821	180	2	480.1	7.8	124.2	22.6	111.3	20.1	13	25.2	34.5	56.1
2.89352e-05	2	0	0	0	WRBS	2.33	1	2004	3-6	10	0	0	0.78	0.315662	180	13	378	8.2	173.7	20.9	43.2	19.7	130.6	22.2	111.3	124.2
0	0	0	0	0	WRBS	2.33	1	2004	7-10	0	1.3	0.526103	1.04	0.420882	180	14	378	8.2	173.7	20.9	43.2	19.7	130.6	22.2	111.3	124.2
9.64506e-05	8	0	0	0	WRBS	2.33	1	2006	3-6	8	0	0	0.92	0.372319	180	37	379.7	9.3	152.7	24.1	91.4	22.9	61.2	25.3	112	155.4
0	0	0	0	0	WRBS	2.33	1	2006	7-10	9	0	0	0.92	0.372319	180	38	379.7	9.3	152.7	24.1	91.4	22.9	61.2	25.3	112	155.4
0	0	0	0	0	WRPM	3	2	2002	3-6	180	0	0	0	0	10	25	369.8	8.5	56.1	25.3	34.5	24.5	21.6	26.2	27.2	104.6
0	0	0	0	0	WRPM	3	2	2002	7-10	180	0	0	0	0	11	26	369.8	8.5	56.1	25.3	34.5	24.5	21.6	26.2	27.2	104.6
0	0	1	0	0	WRPM	3	2	2003	3-6	180	0	0	0	0	10	37	480.1	7.8	124.2	22.6	111.3	20.1	13	25.2	34.5	56.1
0	0	0	0	0	WRPM	3	2	2003	7-10	180	0	0	0	0	11	38	480.1	7.8	124.2	22.6	111.3	20.1	13	25.2	34.5	56.1
7.2338e-05	5	0	0	0	WRPM	3	2	2004	3-6	180	0	0	0	0	10	49	378	8.2	173.7	20.9	43.2	19.7	130.6	22.2	111.3	124.2
1.44676e-05	1	0	0	0	WRPM	3	2	2004	7-10	180	0	0	0	0	11	50	378	8.2	173.7	20.9	43.2	19.7	130.6	22.2	111.3	124.2
0.000108507	8	0	1	0	WRPM	3	2	2005	3-6	180	0	0	0	0	22	61	510.5	8.4	155.4	23.7	112	22.3	43.4	25	43.2	173.7
2.41127e-05	2	0	0	0	WRPM	3	2	2005	7-10	180	0	0	0	0	23	62	510.5	8.4	155.4	23.7	112	22.3	43.4	25	43.2	173.7
0.000108507	7	0	2	0	WRPM	3	2	2006	3-6	180	0	0	0	0	34	73	379.7	9.3	152.7	24.1	91.4	22.9	61.2	25.3	112	155.4
0	0	0	0	0	WRPM	3	2	2006	7-10	180	0	0	0	0	35	74	379.7	9.3	152.7	24.1	91.4	22.9	61.2	25.3	112	155.4
5.26094e-05	3	0	1	0	WRPM	3	2	2007	3-6	0	1.5	0.607042	0	0	46	1	709.7	7.6	182.4	23	72.6	21.4	109.7	24.6	91.4	152.7
1.31524e-05	1	1	0	0	WRPM	3	2	2007	7-10	0	1.5	0.607042	0	0	47	2	709.7	7.6	182.4	23	72.6	21.4	109.7	24.6	91.4	152.7
9.92063e-05	2	0	0	0	WRPM	3	2	2017	3-6	67	0	0	0	0	9	110	444.2	9.1	127.3	24	48.3	22.9	79	25	16	124.2
4.96032e-05	1	0	0	0	WRPM	3	2	2017	7-10	68	0	0	0	0	10	111	444.2	9.1	127.3	24	48.3	22.9	79	25	16	124.2
0	0	0	0	0	WRPM	3	2	2018	3-6	79	0	0	0	0	9	1	570.5	7.3	223	23.7	124.7	24	98.3	23.4	48.3	127.3
0	0	0	0	0	WRPM	3	2	2018	7-10	80	0	0	0	0	10	2	570.5	7.3	223	23.7	124.7	24	98.3	23.4	48.3	127.3
0	0	0	0	0	WRPM	3	2	2019	3-6	91	0	0	0	0	9	13	702.1	6.5	252.2	22.7	114.3	21.2	137.9	24.3	124.7	223
0	0	0	0	0	WRPM	3	2	2019	7-10	92	0	0	0	0	10	14	702.1	6.5	252.2	22.7	114.3	21.2	137.9	24.3	124.7	223
0	0	0	0	0	MOFT	4	1	2002	3-6	70	0	0	0.518	0.209632	180	13	369.8	8.5	56.1	25.3	34.5	24.5	21.6	26.2	27.2	104.6
0	0	0	0	0	MOFT	4	1	2002	7-10	71	0	0	0.518	0.209632	180	14	369.8	8.5	56.1	25.3	34.5	24.5	21.6	26.2	27.2	104.6
0.000115741	7	1	0	0	MOFT	4	1	2003	3-6	0	1.7	0.687981	0.322	0.130312	180	25	480.1	7.8	124.2	22.6	111.3	20.1	13	25.2	34.5	56.1
0	0	0	0	0	MOFT	4	1	2003	7-10	1	0	0	0.322	0.130312	180	26	480.1	7.8	124.2	22.6	111.3	20.1	13	25.2	34.5	56.1
8.68056e-05	6	1	0	0	MOFT	4	1	2004	3-6	7	0	0	0.674	0.272764	180	2	378	8.2	173.7	20.9	43.2	19.7	130.6	22.2	111.3	124.2
2.89352e-05	2	0	0	0	MOFT	4	1	2004	7-10	0	1	0.404694	0.674	0.272764	180	3	378	8.2	173.7	20.9	43.2	19.7	130.6	22.2	111.3	124.2
0.000168789	14	1	0	0	MOFT	4	1	2005	3-6	9	0	0	0.52	0.210441	180	14	510.5	8.4	155.4	23.7	112	22.3	43.4	25	43.2	173.7
8.43943e-05	7	2	0	0	MOFT	4	1	2005	7-10	10	0	0	0.82	0.331849	180	15	510.5	8.4	155.4	23.7	112	22.3	43.4	25	43.2	173.7
8.43943e-05	6	0	1	0	MOFT	4	1	2006	3-6	0	1.7	0.687981	0.82	0.331849	180	26	379.7	9.3	152.7	24.1	91.4	22.9	61.2	25.3	112	155.4
2.41127e-05	2	2	0	0	MOFT	4	1	2006	7-10	1	0	0	0.82	0.331849	180	27	379.7	9.3	152.7	24.1	91.4	22.9	61.2	25.3	112	155.4
0.000131524	9	1	1	0	MOFT	4	1	2007	3-6	7	0	0	1.16	0.469446	180	1	709.7	7.6	182.4	23	72.6	21.4	109.7	24.6	91.4	152.7
6.57618e-05	5	3	0	0	MOFT	4	1	2007	7-10	0	1.7	0.687981	1.16	0.469446	180	2	709.7	7.6	182.4	23	72.6	21.4	109.7	24.6	91.4	152.7
8.43943e-05	7	0	0	0	MOPT	3.5	1	2005	3-6	0	1.7	0.687981	0.936	0.378794	180	1	510.5	8.4	155.4	23.7	112	22.3	43.4	25	43.2	173.7
1.20563e-05	1	2	0	0	MOPT	3.5	1	2005	7-10	1	0	0	0.936	0.378794	180	2	510.5	8.4	155.4	23.7	112	22.3	43.4	25	43.2	173.7
3.6169e-05	3	0	0	0	MOPT	3.5	1	2006	3-6	7	0	0	0.88	0.356131	180	13	379.7	9.3	152.7	24.1	91.4	22.9	61.2	25.3	112	155.4
2.41127e-05	2	1	0	0	MOPT	3.5	1	2006	7-10	0	1	0.404694	1.08	0.43707	180	14	379.7	9.3	152.7	24.1	91.4	22.9	61.2	25.3	112	155.4
0.000118371	8	1	1	0	MOPT	3.5	1	2007	3-6	9	0	0	0.74	0.299474	180	25	709.7	7.6	182.4	23	72.6	21.4	109.7	24.6	91.4	152.7
0	0	0	0	0	MOPT	3.5	1	2007	7-10	10	0	0	0.74	0.299474	180	26	709.7	7.6	182.4	23	72.6	21.4	109.7	24.6	91.4	152.7
4.96032e-05	3	0	0	0	OFPA	3	2	2003	3-6	0	2.1	0.849858	2.16	0.87414	180	66	480.1	7.8	124.2	22.6	111.3	20.1	13	25.2	34.5	56.1
0	0	0	0	0	OFPA	3	2	2003	7-10	1	0	0	2.16	0.87414	180	67	480.1	7.8	124.2	22.6	111.3	20.1	13	25.2	34.5	56.1
0.000101273	7	0	0	0	OFPA	3	2	2004	3-6	0	2.1	0.849858	2.14	0.866046	180	78	378	8.2	173.7	20.9	43.2	19.7	130.6	22.2	111.3	124.2
0	0	1	0	0	OFPA	3	2	2004	7-10	1	0	0	2.14	0.866046	180	79	378	8.2	173.7	20.9	43.2	19.7	130.6	22.2	111.3	124.2
0.000105219	8	0	0	0	OFPA	3	2	2007	3-6	0	1.5	0.607042	1.86	0.752732	180	1	709.7	7.6	182.4	23	72.6	21.4	109.7	24.6	91.4	152.7
1.31524e-05	1	0	0	0	OFPA	3	2	2007	7-10	0	1.5	0.607042	1.86	0.752732	180	2	709.7	7.6	182.4	23	72.6	21.4	109.7	24.6	91.4	152.7
1.65344e-05	1	0	0	0	MOFL	2.33	2	2003	3-6	180	0	0	0	0	10	37	480.1	7.8	124.2	22.6	111.3	20.1	13	25.2	34.5	56.1
0	0	0	0	0	MOFL	2.33	2	2003	7-10	180	0	0	0	0	11	38	480.1	7.8	124.2	22.6	111.3	20.1	13	25.2	34.5	56.1
0	0	0	0	0	MOFV	2	2	2002	3-6	180	0	0	0	0	32	73	369.8	8.5	56.1	25.3	34.5	24.5	21.6	26.2	27.2	104.6
0	0	0	0	0	MOFV	2	2	2002	7-10	180	0	0	0	0	33	74	369.8	8.5	56.1	25.3	34.5	24.5	21.6	26.2	27.2	104.6
1.20563e-05	1	0	0	0	MOFV	2	2	2005	3-6	180	0	0	0	0	10	109	510.5	8.4	155.4	23.7	112	22.3	43.4	25	43.2	173.7
4.82253e-05	3	0	1	0	MOFV	2	2	2005	7-10	180	0	0	0	0	11	110	510.5	8.4	155.4	23.7	112	22.3	43.4	25	43.2	173.7
3.6169e-05	3	0	0	0	MOFV	2	2	2006	3-6	180	0	0	0	0	180	121	379.7	9.3	152.7	24.1	91.4	22.9	61.2	25.3	112	155.4
0	0	2	0	0	MOFV	2	2	2006	7-10	180	0	0	0	0	11	122	379.7	9.3	152.7	24.1	91.4	22.9	61.2	25.3	112	155.4
0.00013262	11	0	0	0	WRMP	3	1	2005	3-6	8	0	0	0.92	0.372319	180	37	510.5	8.4	155.4	23.7	112	22.3	43.4	25	43.2	173.7
0	0	0	0	0	WRMP	3	1	2005	7-10	9	0	0	0.92	0.372319	180	38	510.5	8.4	155.4	23.7	112	22.3	43.4	25	43.2	173.7
0	0	0	0	0	MOFS	2.67	1	2002	3-6	180	0	0	0	0	32	89	369.8	8.5	56.1	25.3	34.5	24.5	21.6	26.2	27.2	104.6
0	0	0	0	0	MOFS	2.67	1	2002	7-10	180	0	0	0	0	33	90	369.8	8.5	56.1	25.3	34.5	24.5	21.6	26.2	27.2	104.6

## Sheet: BHCO_HY
HY	site	mesic	land.use	year	period	graze.months	current(aum/ac)	current.stocking.rate	history(aum/ac)	grazing.history	hay.months	burn.months	precip.aug.may	avg.temp.aug.may	precip.june.july	avg.temp.june.july	precip.june	avg.temp.june	precip.july	avg.temp.july	precip.june.previous.year	precip.june.july.previous.year
0	CRME	3	2	2004	3-6	180	0	0	0	0	180	1	378	8.2	173.7	20.9	43.2	19.7	130.6	22.2	111.3	124.2
0	CRME	3	2	2004	3-6	180	0	0	0	0	180	1	378	8.2	173.7	20.9	43.2	19.7	130.6	22.2	111.3	124.2
0	CRME	3	2	2004	3-6	180	0	0	0	0	180	1	378	8.2	173.7	20.9	43.2	19.7	130.6	22.2	111.3	124.2
0	CRME	3	2	2017	3-6	10	0	0	0.23	0.0930797	180	158	444.2	9.1	127.3	24	48.3	22.9	79	25	16	124.2
0	CRME	3	2	2018	3-6	1	0	0	0.197	0.0797248	180	170	570.5	7.3	223	23.7	124.7	24	98.3	23.4	48.3	127.3
0	FETW	3.67	1	2005	3-6	21	0	0	0.834	0.337515	180	1	510.5	8.4	155.4	23.7	112	22.3	43.4	25	43.2	173.7
0	FETW	3.67	1	2005	3-6	21	0	0	0.834	0.337515	180	1	510.5	8.4	155.4	23.7	112	22.3	43.4	25	43.2	173.7
0	FETW	3.67	1	2005	3-6	21	0	0	0.834	0.337515	180	1	510.5	8.4	155.4	23.7	112	22.3	43.4	25	43.2	173.7
0	FETW	3.67	1	2005	3-6	21	0	0	0.834	0.337515	180	1	510.5	8.4	155.4	23.7	112	22.3	43.4	25	43.2	173.7
0	FETW	3.67	1	2005	3-6	21	0	0	0.834	0.337515	180	1	510.5	8.4	155.4	23.7	112	22.3	43.4	25	43.2	173.7
0	FETW	3.67	1	2005	3-6	21	0	0	0.834	0.337515	180	1	510.5	8.4	155.4	23.7	112	22.3	43.4	25	43.2	173.7
0	FETW	3.67	1	2005	3-6	21	0	0	0.834	0.337515	180	1	510.5	8.4	155.4	23.7	112	22.3	43.4	25	43.2	173.7
0	FETW	3.67	1	2005	3-6	21	0	0	0.834	0.337515	180	1	510.5	8.4	155.4	23.7	112	22.3	43.4	25	43.2	173.7
0	FETW	3.67	1	2005	3-6	21	0	0	0.834	0.337515	180	1	510.5	8.4	155.4	23.7	112	22.3	43.4	25	43.2	173.7
0	FETW	3.67	1	2005	3-6	21	0	0	0.834	0.337515	180	1	510.5	8.4	155.4	23.7	112	22.3	43.4	25	43.2	173.7
0	FETW	3.67	1	2005	3-6	21	0	0	0.834	0.337515	180	1	510.5	8.4	155.4	23.7	112	22.3	43.4	25	43.2	173.7
0	FETW	3.67	1	2005	3-6	21	0	0	0.834	0.337515	180	1	510.5	8.4	155.4	23.7	112	22.3	43.4	25	43.2	173.7
0	FETW	3.67	1	2005	3-6	21	0	0	0.834	0.337515	180	1	510.5	8.4	155.4	23.7	112	22.3	43.4	25	43.2	173.7
0	FETW	3.67	1	2005	7-10	22	0	0	0.834	0.337515	180	2	510.5	8.4	155.4	23.7	112	22.3	43.4	25	43.2	173.7
0	FETW	3.67	1	2005	7-10	22	0	0	0.834	0.337515	180	2	510.5	8.4	155.4	23.7	112	22.3	43.4	25	43.2	173.7
1	FETW	3.67	1	2005	7-10	22	0	0	0.834	0.337515	180	2	510.5	8.4	155.4	23.7	112	22.3	43.4	25	43.2	173.7
1	FETW	3.67	1	2005	7-10	22	0	0	0.834	0.337515	180	2	510.5	8.4	155.4	23.7	112	22.3	43.4	25	43.2	173.7
0	FETW	3.67	1	2006	3-6	0	2.2	0.890328	1.12	0.453258	180	13	379.7	9.3	152.7	24.1	91.4	22.9	61.2	25.3	112	155.4
0	FETW	3.67	1	2006	3-6	0	2.2	0.890328	1.12	0.453258	180	13	379.7	9.3	152.7	24.1	91.4	22.9	61.2	25.3	112	155.4
0	FETW	3.67	1	2006	3-6	0	2.2	0.890328	1.12	0.453258	180	13	379.7	9.3	152.7	24.1	91.4	22.9	61.2	25.3	112	155.4
0	FETW	3.67	1	2006	3-6	0	2.2	0.890328	1.12	0.453258	180	13	379.7	9.3	152.7	24.1	91.4	22.9	61.2	25.3	112	155.4
0	FETW	3.67	1	2006	3-6	0	2.2	0.890328	1.12	0.453258	180	13	379.7	9.3	152.7	24.1	91.4	22.9	61.2	25.3	112	155.4
0	FETW	3.67	1	2006	3-6	0	2.2	0.890328	1.12	0.453258	180	13	379.7	9.3	152.7	24.1	91.4	22.9	61.2	25.3	112	155.4
0	FETW	3.67	1	2006	3-6	0	2.2	0.890328	1.12	0.453258	180	13	379.7	9.3	152.7	24.1	91.4	22.9	61.2	25.3	112	155.4
0	FETW	3.67	1	2007	3-6	9	0	0	0.68	0.275192	180	25	709.7	7.6	182.4	23	72.6	21.4	109.7	24.6	91.4	152.7
0	FETW	3.67	1	2007	3-6	9	0	0	0.68	0.275192	180	25	709.7	7.6	182.4	23	72.6	21.4	109.7	24.6	91.4	152.7
0	FETW	3.67	1	2007	3-6	9	0	0	0.68	0.275192	180	25	709.7	7.6	182.4	23	72.6	21.4	109.7	24.6	91.4	152.7
0	FETW	3.67	1	2007	3-6	9	0	0	0.68	0.275192	180	25	709.7	7.6	182.4	23	72.6	21.4	109.7	24.6	91.4	152.7
0	FETW	3.67	1	2007	3-6	9	0	0	0.68	0.275192	180	25	709.7	7.6	182.4	23	72.6	21.4	109.7	24.6	91.4	152.7
0	FETW	3.67	1	2007	3-6	9	0	0	0.68	0.275192	180	25	709.7	7.6	182.4	23	72.6	21.4	109.7	24.6	91.4	152.7
1	FETW	3.67	1	2007	7-10	0	1.7	0.687981	1.02	0.412788	180	26	709.7	7.6	182.4	23	72.6	21.4	109.7	24.6	91.4	152.7
1	FETW	3.67	1	2007	7-10	0	1.7	0.687981	1.02	0.412788	180	26	709.7	7.6	182.4	23	72.6	21.4	109.7	24.6	91.4	152.7
1	FETW	3.67	1	2007	7-10	0	1.7	0.687981	1.02	0.412788	180	26	709.7	7.6	182.4	23	72.6	21.4	109.7	24.6	91.4	152.7
1	FETW	3.67	1	2007	7-10	0	1.7	0.687981	1.02	0.412788	180	26	709.7	7.6	182.4	23	72.6	21.4	109.7	24.6	91.4	152.7
0	FONE	2	1	2003	3-6	9	0	0	0.714	0.288952	180	25	480.1	7.8	124.2	22.6	111.3	20.1	13	25.2	34.5	56.1
0	FONE	2	1	2003	3-6	9	0	0	0.714	0.288952	180	25	480.1	7.8	124.2	22.6	111.3	20.1	13	25.2	34.5	56.1
0	FONE	2	1	2003	3-6	9	0	0	0.714	0.288952	180	25	480.1	7.8	124.2	22.6	111.3	20.1	13	25.2	34.5	56.1
0	FONE	2	1	2003	3-6	9	0	0	0.714	0.288952	180	25	480.1	7.8	124.2	22.6	111.3	20.1	13	25.2	34.5	56.1
0	FONE	2	1	2004	3-6	21	0	0	0.56	0.226629	180	37	378	8.2	173.7	20.9	43.2	19.7	130.6	22.2	111.3	124.2
0	FONE	2	1	2004	3-6	21	0	0	0.56	0.226629	180	37	378	8.2	173.7	20.9	43.2	19.7	130.6	22.2	111.3	124.2
0	FONE	2	1	2004	3-6	21	0	0	0.56	0.226629	180	37	378	8.2	173.7	20.9	43.2	19.7	130.6	22.2	111.3	124.2
0	FONE	2	1	2004	3-6	21	0	0	0.56	0.226629	180	37	378	8.2	173.7	20.9	43.2	19.7	130.6	22.2	111.3	124.2
0	FONE	2	1	2004	3-6	21	0	0	0.56	0.226629	180	37	378	8.2	173.7	20.9	43.2	19.7	130.6	22.2	111.3	124.2
0	FONE	2	1	2004	3-6	21	0	0	0.56	0.226629	180	37	378	8.2	173.7	20.9	43.2	19.7	130.6	22.2	111.3	124.2
0	FONE	2	1	2004	3-6	21	0	0	0.56	0.226629	180	37	378	8.2	173.7	20.9	43.2	19.7	130.6	22.2	111.3	124.2
0	FONE	2	1	2004	3-6	21	0	0	0.56	0.226629	180	37	378	8.2	173.7	20.9	43.2	19.7	130.6	22.2	111.3	124.2
0	FONE	2	1	2005	3-6	0	2.4	0.971267	1.04	0.420882	180	1	510.5	8.4	155.4	23.7	112	22.3	43.4	25	43.2	173.7
0	FONE	2	1	2005	3-6	0	2.4	0.971267	1.04	0.420882	180	1	510.5	8.4	155.4	23.7	112	22.3	43.4	25	43.2	173.7
0	FONE	2	1	2005	3-6	0	2.4	0.971267	1.04	0.420882	180	1	510.5	8.4	155.4	23.7	112	22.3	43.4	25	43.2	173.7
0	FONE	2	1	2005	3-6	0	2.4	0.971267	1.04	0.420882	180	1	510.5	8.4	155.4	23.7	112	22.3	43.4	25	43.2	173.7
0	FONE	2	1	2005	3-6	0	2.4	0.971267	1.04	0.420882	180	1	510.5	8.4	155.4	23.7	112	22.3	43.4	25	43.2	173.7
0	FONE	2	1	2005	3-6	0	2.4	0.971267	1.04	0.420882	180	1	510.5	8.4	155.4	23.7	112	22.3	43.4	25	43.2	173.7
0	FONE	2	1	2005	7-10	1	0	0	1.04	0.420882	180	2	510.5	8.4	155.4	23.7	112	22.3	43.4	25	43.2	173.7
0	FONE	2	1	2005	7-10	1	0	0	1.04	0.420882	180	2	510.5	8.4	155.4	23.7	112	22.3	43.4	25	43.2	173.7
0	FONE	2	1	2005	7-10	1	0	0	1.04	0.420882	180	2	510.5	8.4	155.4	23.7	112	22.3	43.4	25	43.2	173.7
1	FONE	2	1	2005	7-10	1	0	0	1.04	0.420882	180	2	510.5	8.4	155.4	23.7	112	22.3	43.4	25	43.2	173.7
1	FONE	2	1	2005	7-10	1	0	0	1.04	0.420882	180	2	510.5	8.4	155.4	23.7	112	22.3	43.4	25	43.2	173.7
0	FONE	2	1	2006	3-6	7	0	0	0.72	0.29138	180	13	379.7	9.3	152.7	24.1	91.4	22.9	61.2	25.3	112	155.4
0	FONE	2	1	2006	3-6	7	0	0	0.72	0.29138	180	13	379.7	9.3	152.7	24.1	91.4	22.9	61.2	25.3	112	155.4
0	FONE	2	1	2006	3-6	7	0	0	0.72	0.29138	180	13	379.7	9.3	152.7	24.1	91.4	22.9	61.2	25.3	112	155.4
0	FONE	2	1	2006	7-10	0	1.2	0.485633	0.96	0.388507	180	14	379.7	9.3	152.7	24.1	91.4	22.9	61.2	25.3	112	155.4
0	FONE	2	1	2006	7-10	0	1.2	0.485633	0.96	0.388507	180	14	379.7	9.3	152.7	24.1	91.4	22.9	61.2	25.3	112	155.4
1	FONE	2	1	2006	7-10	0	1.2	0.485633	0.96	0.388507	180	14	379.7	9.3	152.7	24.1	91.4	22.9	61.2	25.3	112	155.4
0	FONE	2	1	2007	3-6	9	0	0	0.72	0.29138	180	25	709.7	7.6	182.4	23	72.6	21.4	109.7	24.6	91.4	152.7
0	FONE	2	1	2007	3-6	9	0	0	0.72	0.29138	180	25	709.7	7.6	182.4	23	72.6	21.4	109.7	24.6	91.4	152.7
0	FONE	2	1	2007	3-6	9	0	0	0.72	0.29138	180	25	709.7	7.6	182.4	23	72.6	21.4	109.7	24.6	91.4	152.7
0	FONE	2	1	2007	3-6	9	0	0	0.72	0.29138	180	25	709.7	7.6	182.4	23	72.6	21.4	109.7	24.6	91.4	152.7
0	FONE	2	1	2007	3-6	9	0	0	0.72	0.29138	180	25	709.7	7.6	182.4	23	72.6	21.4	109.7	24.6	91.4	152.7
0	FONE	2	1	2007	3-6	9	0	0	0.72	0.29138	180	25	709.7	7.6	182.4	23	72.6	21.4	109.7	24.6	91.4	152.7
0	FONE	2	1	2007	3-6	9	0	0	0.72	0.29138	180	25	709.7	7.6	182.4	23	72.6	21.4	109.7	24.6	91.4	152.7
0	FONE	2	1	2007	3-6	9	0	0	0.72	0.29138	180	25	709.7	7.6	182.4	23	72.6	21.4	109.7	24.6	91.4	152.7
1	FONE	2	1	2007	3-6	9	0	0	0.72	0.29138	180	25	709.7	7.6	182.4	23	72.6	21.4	109.7	24.6	91.4	152.7
0	FONE	2	1	2007	7-10	10	0	0	0.72	0.29138	180	26	709.7	7.6	182.4	23	72.6	21.4	109.7	24.6	91.4	152.7
0	FONE	2	1	2007	7-10	10	0	0	0.72	0.29138	180	26	709.7	7.6	182.4	23	72.6	21.4	109.7	24.6	91.4	152.7
0	FONE	2	1	2007	7-10	10	0	0	0.72	0.29138	180	26	709.7	7.6	182.4	23	72.6	21.4	109.7	24.6	91.4	152.7
0	FONE	2	1	2007	7-10	10	0	0	0.72	0.29138	180	26	709.7	7.6	182.4	23	72.6	21.4	109.7	24.6	91.4	152.7
1	FONE	2	1	2007	7-10	10	0	0	0.72	0.29138	180	26	709.7	7.6	182.4	23	72.6	21.4	109.7	24.6	91.4	152.7
1	FONE	2	1	2007	7-10	10	0	0	0.72	0.29138	180	26	709.7	7.6	182.4	23	72.6	21.4	109.7	24.6	91.4	152.7
1	FONE	2	1	2007	7-10	10	0	0	0.72	0.29138	180	26	709.7	7.6	182.4	23	72.6	21.4	109.7	24.6	91.4	152.7
1	FONE	2	1	2007	7-10	10	0	0	0.72	0.29138	180	26	709.7	7.6	182.4	23	72.6	21.4	109.7	24.6	91.4	152.7
0	MOFE	2	1	2003	3-6	180	0	0	0	0	10	37	480.1	7.8	124.2	22.6	111.3	20.1	13	25.2	34.5	56.1
0	MOFE	2	1	2003	3-6	180	0	0	0	0	10	37	480.1	7.8	124.2	22.6	111.3	20.1	13	25.2	34.5	56.1
0	MOFE	2	1	2003	3-6	180	0	0	0	0	10	37	480.1	7.8	124.2	22.6	111.3	20.1	13	25.2	34.5	56.1
0	MOFE	2	1	2003	3-6	180	0	0	0	0	10	37	480.1	7.8	124.2	22.6	111.3	20.1	13	25.2	34.5	56.1
0	MOFE	2	1	2003	3-6	180	0	0	0	0	10	37	480.1	7.8	124.2	22.6	111.3	20.1	13	25.2	34.5	56.1
0	MOFE	2	1	2003	3-6	180	0	0	0	0	10	37	480.1	7.8	124.2	22.6	111.3	20.1	13	25.2	34.5	56.1
0	MOFE	2	1	2003	3-6	180	0	0	0	0	10	37	480.1	7.8	124.2	22.6	111.3	20.1	13	25.2	34.5	56.1
0	MOFE	2	1	2003	3-6	180	0	0	0	0	10	37	480.1	7.8	124.2	22.6	111.3	20.1	13	25.2	34.5	56.1
0	MOFE	2	1	2003	3-6	180	0	0	0	0	10	37	480.1	7.8	124.2	22.6	111.3	20.1	13	25.2	34.5	56.1
0	MOFE	2	1	2004	3-6	180	0	0	0	0	22	49	378	8.2	173.7	20.9	43.2	19.7	130.6	22.2	111.3	124.2
0	MOFE	2	1	2004	3-6	180	0	0	0	0	22	49	378	8.2	173.7	20.9	43.2	19.7	130.6	22.2	111.3	124.2
0	MOFE	2	1	2004	3-6	180	0	0	0	0	22	49	378	8.2	173.7	20.9	43.2	19.7	130.6	22.2	111.3	124.2
0	MOFE	2	1	2004	3-6	180	0	0	0	0	22	49	378	8.2	173.7	20.9	43.2	19.7	130.6	22.2	111.3	124.2
0	MOFE	2	1	2004	3-6	180	0	0	0	0	22	49	378	8.2	173.7	20.9	43.2	19.7	130.6	22.2	111.3	124.2
1	MOFE	2	1	2004	3-6	180	0	0	0	0	22	49	378	8.2	173.7	20.9	43.2	19.7	130.6	22.2	111.3	124.2
0	MOFE	2	1	2004	7-10	180	0	0	0	0	23	50	378	8.2	173.7	20.9	43.2	19.7	130.6	22.2	111.3	124.2
0	MOFE	2	1	2004	7-10	180	0	0	0	0	23	50	378	8.2	173.7	20.9	43.2	19.7	130.6	22.2	111.3	124.2
0	MOFE	2	1	2005	3-6	180	0	0	0	0	34	61	510.5	8.4	155.4	23.7	112	22.3	43.4	25	43.2	173.7
0	MOFE	2	1	2005	3-6	180	0	0	0	0	34	61	510.5	8.4	155.4	23.7	112	22.3	43.4	25	43.2	173.7
0	MOFE	2	1	2006	3-6	180	0	0	0	0	46	1	379.7	9.3	152.7	24.1	91.4	22.9	61.2	25.3	112	155.4
0	MOFE	2	1	2006	7-10	180	0	0	0	0	47	2	379.7	9.3	152.7	24.1	91.4	22.9	61.2	25.3	112	155.4
0	MOFE	2	1	2007	3-6	180	0	0	0	0	58	13	709.7	7.6	182.4	23	72.6	21.4	109.7	24.6	91.4	152.7
0	MOFE	2	1	2007	3-6	180	0	0	0	0	58	13	709.7	7.6	182.4	23	72.6	21.4	109.7	24.6	91.4	152.7
0	MOFE	2	1	2007	3-6	180	0	0	0	0	58	13	709.7	7.6	182.4	23	72.6	21.4	109.7	24.6	91.4	152.7
0	MOFE	2	1	2007	3-6	180	0	0	0	0	58	13	709.7	7.6	182.4	23	72.6	21.4	109.7	24.6	91.4	152.7
0	MOFE	2	1	2007	3-6	180	0	0	0	0	58	13	709.7	7.6	182.4	23	72.6	21.4	109.7	24.6	91.4	152.7
0	MOFE	2	1	2007	3-6	180	0	0	0	0	58	13	709.7	7.6	182.4	23	72.6	21.4	109.7	24.6	91.4	152.7
0	MOFE	2	1	2007	3-6	180	0	0	0	0	58	13	709.7	7.6	182.4	23	72.6	21.4	109.7	24.6	91.4	152.7
0	MOFE	2	1	2007	3-6	180	0	0	0	0	58	13	709.7	7.6	182.4	23	72.6	21.4	109.7	24.6	91.4	152.7
0	MOFE	2	1	2007	3-6	180	0	0	0	0	58	13	709.7	7.6	182.4	23	72.6	21.4	109.7	24.6	91.4	152.7
0	MOFE	2	1	2007	3-6	180	0	0	0	0	58	13	709.7	7.6	182.4	23	72.6	21.4	109.7	24.6	91.4	152.7
0	MOFE	2	1	2007	3-6	180	0	0	0	0	58	13	709.7	7.6	182.4	23	72.6	21.4	109.7	24.6	91.4	152.7
0	MOFE	2	1	2007	3-6	180	0	0	0	0	58	13	709.7	7.6	182.4	23	72.6	21.4	109.7	24.6	91.4	152.7
0	MOFE	2	1	2007	3-6	180	0	0	0	0	58	13	709.7	7.6	182.4	23	72.6	21.4	109.7	24.6	91.4	152.7
0	MOFE	2	1	2007	3-6	180	0	0	0	0	58	13	709.7	7.6	182.4	23	72.6	21.4	109.7	24.6	91.4	152.7
0	MOFE	2	1	2007	3-6	180	0	0	0	0	58	13	709.7	7.6	182.4	23	72.6	21.4	109.7	24.6	91.4	152.7
0	MOFE	2	1	2007	3-6	180	0	0	0	0	58	13	709.7	7.6	182.4	23	72.6	21.4	109.7	24.6	91.4	152.7
0	MOFE	2	1	2007	7-10	180	0	0	0	0	59	14	709.7	7.6	182.4	23	72.6	21.4	109.7	24.6	91.4	152.7
0	MOFE	2	1	2007	7-10	180	0	0	0	0	59	14	709.7	7.6	182.4	23	72.6	21.4	109.7	24.6	91.4	152.7
0	MOFE	2	1	2007	7-10	180	0	0	0	0	59	14	709.7	7.6	182.4	23	72.6	21.4	109.7	24.6	91.4	152.7
0	MOFE	2	1	2007	7-10	180	0	0	0	0	59	14	709.7	7.6	182.4	23	72.6	21.4	109.7	24.6	91.4	152.7
0	MOFE	2	1	2007	7-10	180	0	0	0	0	59	14	709.7	7.6	182.4	23	72.6	21.4	109.7	24.6	91.4	152.7
0	MOFE	2	1	2007	7-10	180	0	0	0	0	59	14	709.7	7.6	182.4	23	72.6	21.4	109.7	24.6	91.4	152.7
0	MOFE	2	1	2007	7-10	180	0	0	0	0	59	14	709.7	7.6	182.4	23	72.6	21.4	109.7	24.6	91.4	152.7
0	MOFE	2	1	2007	7-10	180	0	0	0	0	59	14	709.7	7.6	182.4	23	72.6	21.4	109.7	24.6	91.4	152.7
0	MOFE	2	1	2007	7-10	180	0	0	0	0	59	14	709.7	7.6	182.4	23	72.6	21.4	109.7	24.6	91.4	152.7
0	MOFE	2	1	2007	7-10	180	0	0	0	0	59	14	709.7	7.6	182.4	23	72.6	21.4	109.7	24.6	91.4	152.7
1	MOFE	2	1	2007	7-10	180	0	0	0	0	59	14	709.7	7.6	182.4	23	72.6	21.4	109.7	24.6	91.4	152.7
1	MOFE	2	1	2007	7-10	180	0	0	0	0	59	14	709.7	7.6	182.4	23	72.6	21.4	109.7	24.6	91.4	152.7
1	MOFE	2	1	2007	7-10	180	0	0	0	0	59	14	709.7	7.6	182.4	23	72.6	21.4	109.7	24.6	91.4	152.7
1	MOFE	2	1	2007	7-10	180	0	0	0	0	59	14	709.7	7.6	182.4	23	72.6	21.4	109.7	24.6	91.4	152.7
1	MOFE	2	1	2007	7-10	180	0	0	0	0	59	14	709.7	7.6	182.4	23	72.6	21.4	109.7	24.6	91.4	152.7
1	MOFE	2	1	2007	7-10	180	0	0	0	0	59	14	709.7	7.6	182.4	23	72.6	21.4	109.7	24.6	91.4	152.7
1	MOFE	2	1	2007	7-10	180	0	0	0	0	59	14	709.7	7.6	182.4	23	72.6	21.4	109.7	24.6	91.4	152.7
1	MOFE	2	1	2007	7-10	180	0	0	0	0	59	14	709.7	7.6	182.4	23	72.6	21.4	109.7	24.6	91.4	152.7
1	MOFE	2	1	2007	7-10	180	0	0	0	0	59	14	709.7	7.6	182.4	23	72.6	21.4	109.7	24.6	91.4	152.7
0	MOFE	2	1	2017	3-6	7	0	0	0.564	0.228248	180	49	444.2	9.1	127.3	24	48.3	22.9	79	25	16	124.2
0	MOFE	2	1	2017	3-6	7	0	0	0.564	0.228248	180	49	444.2	9.1	127.3	24	48.3	22.9	79	25	16	124.2
0	MOFE	2	1	2017	3-6	7	0	0	0.564	0.228248	180	49	444.2	9.1	127.3	24	48.3	22.9	79	25	16	124.2
0	MOFE	2	1	2017	3-6	7	0	0	0.564	0.228248	180	49	444.2	9.1	127.3	24	48.3	22.9	79	25	16	124.2
0	MOFE	2	1	2017	3-6	7	0	0	0.564	0.228248	180	49	444.2	9.1	127.3	24	48.3	22.9	79	25	16	124.2
0	MOFE	2	1	2017	3-6	7	0	0	0.564	0.228248	180	49	444.2	9.1	127.3	24	48.3	22.9	79	25	16	124.2
0	MOFE	2	1	2017	7-10	8	0	0	0.564	0.228248	180	50	444.2	9.1	127.3	24	48.3	22.9	79	25	16	124.2
0	MOFE	2	1	2017	7-10	8	0	0	0.564	0.228248	180	50	444.2	9.1	127.3	24	48.3	22.9	79	25	16	124.2
0	MOFE	2	1	2017	7-10	8	0	0	0.564	0.228248	180	50	444.2	9.1	127.3	24	48.3	22.9	79	25	16	124.2
0	MOFE	2	1	2017	7-10	8	0	0	0.564	0.228248	180	50	444.2	9.1	127.3	24	48.3	22.9	79	25	16	124.2
0	MOFE	2	1	2017	7-10	8	0	0	0.564	0.228248	180	50	444.2	9.1	127.3	24	48.3	22.9	79	25	16	124.2
1	MOFE	2	1	2017	7-10	8	0	0	0.564	0.228248	180	50	444.2	9.1	127.3	24	48.3	22.9	79	25	16	124.2
1	MOFE	2	1	2017	7-10	8	0	0	0.564	0.228248	180	50	444.2	9.1	127.3	24	48.3	22.9	79	25	16	124.2
0	MOFE	2	1	2018	3-6	0	0.88	0.356131	0.904	0.365844	180	61	570.5	7.3	223	23.7	124.7	24	98.3	23.4	48.3	127.3
0	MOFE	2	1	2018	3-6	0	0.88	0.356131	0.904	0.365844	180	61	570.5	7.3	223	23.7	124.7	24	98.3	23.4	48.3	127.3
0	MOFE	2	1	2018	7-10	0	0.46	0.186159	0.862	0.348847	180	62	570.5	7.3	223	23.7	124.7	24	98.3	23.4	48.3	127.3
1	MOFE	2	1	2018	7-10	0	0.46	0.186159	0.862	0.348847	180	62	570.5	7.3	223	23.7	124.7	24	98.3	23.4	48.3	127.3
0	MOFF	2.33	2	2004	3-6	0	2.6	1.05221	0.34	0.137596	180	50	378	8.2	173.7	20.9	43.2	19.7	130.6	22.2	111.3	124.2
0	MOFF	2.33	2	2004	3-6	0	2.6	1.05221	0.34	0.137596	180	50	378	8.2	173.7	20.9	43.2	19.7	130.6	22.2	111.3	124.2
0	MOFF	2.33	2	2004	3-6	0	2.6	1.05221	0.34	0.137596	180	50	378	8.2	173.7	20.9	43.2	19.7	130.6	22.2	111.3	124.2
0	MOFF	2.33	2	2004	3-6	0	2.6	1.05221	0.34	0.137596	180	50	378	8.2	173.7	20.9	43.2	19.7	130.6	22.2	111.3	124.2
0	MOFF	2.33	2	2004	3-6	0	2.6	1.05221	0.34	0.137596	180	50	378	8.2	173.7	20.9	43.2	19.7	130.6	22.2	111.3	124.2
0	MOFF	2.33	2	2004	7-10	1	0	0	0.54	0.218535	180	51	378	8.2	173.7	20.9	43.2	19.7	130.6	22.2	111.3	124.2
0	MOFF	2.33	2	2004	7-10	1	0	0	0.54	0.218535	180	51	378	8.2	173.7	20.9	43.2	19.7	130.6	22.2	111.3	124.2
0	MOFF	2.33	2	2005	3-6	7	0	0	0.54	0.218535	180	62	510.5	8.4	155.4	23.7	112	22.3	43.4	25	43.2	173.7
0	MOFF	2.33	2	2005	3-6	7	0	0	0.54	0.218535	180	62	510.5	8.4	155.4	23.7	112	22.3	43.4	25	43.2	173.7
0	MOFF	2.33	2	2005	3-6	7	0	0	0.54	0.218535	180	62	510.5	8.4	155.4	23.7	112	22.3	43.4	25	43.2	173.7
0	MOFF	2.33	2	2005	3-6	7	0	0	0.54	0.218535	180	62	510.5	8.4	155.4	23.7	112	22.3	43.4	25	43.2	173.7
0	MOFF	2.33	2	2005	3-6	7	0	0	0.54	0.218535	180	62	510.5	8.4	155.4	23.7	112	22.3	43.4	25	43.2	173.7
0	MOFF	2.33	2	2005	3-6	7	0	0	0.54	0.218535	180	62	510.5	8.4	155.4	23.7	112	22.3	43.4	25	43.2	173.7
0	MOFF	2.33	2	2005	3-6	7	0	0	0.54	0.218535	180	62	510.5	8.4	155.4	23.7	112	22.3	43.4	25	43.2	173.7
0	MOFF	2.33	2	2005	3-6	7	0	0	0.54	0.218535	180	62	510.5	8.4	155.4	23.7	112	22.3	43.4	25	43.2	173.7
0	MOFF	2.33	2	2005	3-6	7	0	0	0.54	0.218535	180	62	510.5	8.4	155.4	23.7	112	22.3	43.4	25	43.2	173.7
0	MOFF	2.33	2	2005	3-6	7	0	0	0.54	0.218535	180	62	510.5	8.4	155.4	23.7	112	22.3	43.4	25	43.2	173.7
1	MOFF	2.33	2	2005	3-6	7	0	0	0.54	0.218535	180	62	510.5	8.4	155.4	23.7	112	22.3	43.4	25	43.2	173.7
1	MOFF	2.33	2	2005	3-6	7	0	0	0.54	0.218535	180	62	510.5	8.4	155.4	23.7	112	22.3	43.4	25	43.2	173.7
0	MOFF	2.33	2	2005	7-10	0	1.5	0.607042	0.54	0.218535	180	63	510.5	8.4	155.4	23.7	112	22.3	43.4	25	43.2	173.7
0	MOFF	2.33	2	2005	7-10	0	1.5	0.607042	0.54	0.218535	180	63	510.5	8.4	155.4	23.7	112	22.3	43.4	25	43.2	173.7
1	MOFF	2.33	2	2005	7-10	0	1.5	0.607042	0.54	0.218535	180	63	510.5	8.4	155.4	23.7	112	22.3	43.4	25	43.2	173.7
0	MOFF	2.33	2	2006	3-6	9	0	0	0.88	0.356131	180	2	379.7	9.3	152.7	24.1	91.4	22.9	61.2	25.3	112	155.4
0	MOFF	2.33	2	2006	3-6	9	0	0	0.88	0.356131	180	2	379.7	9.3	152.7	24.1	91.4	22.9	61.2	25.3	112	155.4
0	MOFF	2.33	2	2006	3-6	9	0	0	0.88	0.356131	180	2	379.7	9.3	152.7	24.1	91.4	22.9	61.2	25.3	112	155.4
0	MOFF	2.33	2	2006	3-6	9	0	0	0.88	0.356131	180	2	379.7	9.3	152.7	24.1	91.4	22.9	61.2	25.3	112	155.4
0	MOFF	2.33	2	2006	3-6	9	0	0	0.88	0.356131	180	2	379.7	9.3	152.7	24.1	91.4	22.9	61.2	25.3	112	155.4
0	MOFF	2.33	2	2006	7-10	10	0	0	0.88	0.356131	180	3	379.7	9.3	152.7	24.1	91.4	22.9	61.2	25.3	112	155.4
1	MOFF	2.33	2	2006	7-10	10	0	0	0.88	0.356131	180	3	379.7	9.3	152.7	24.1	91.4	22.9	61.2	25.3	112	155.4
0	MOFF	2.33	2	2007	3-6	0	1.7	0.687981	0.88	0.356131	180	1	709.7	7.6	182.4	23	72.6	21.4	109.7	24.6	91.4	152.7
0	MOFF	2.33	2	2007	3-6	0	1.7	0.687981	0.88	0.356131	180	1	709.7	7.6	182.4	23	72.6	21.4	109.7	24.6	91.4	152.7
0	MOFF	2.33	2	2007	3-6	0	1.7	0.687981	0.88	0.356131	180	1	709.7	7.6	182.4	23	72.6	21.4	109.7	24.6	91.4	152.7
0	MOFF	2.33	2	2007	3-6	0	1.7	0.687981	0.88	0.356131	180	1	709.7	7.6	182.4	23	72.6	21.4	109.7	24.6	91.4	152.7
0	MOFF	2.33	2	2007	3-6	0	1.7	0.687981	0.88	0.356131	180	1	709.7	7.6	182.4	23	72.6	21.4	109.7	24.6	91.4	152.7
0	MOFF	2.33	2	2007	3-6	0	1.7	0.687981	0.88	0.356131	180	1	709.7	7.6	182.4	23	72.6	21.4	109.7	24.6	91.4	152.7
0	MOFF	2.33	2	2007	3-6	0	1.7	0.687981	0.88	0.356131	180	1	709.7	7.6	182.4	23	72.6	21.4	109.7	24.6	91.4	152.7
0	MOFF	2.33	2	2007	3-6	0	1.7	0.687981	0.88	0.356131	180	1	709.7	7.6	182.4	23	72.6	21.4	109.7	24.6	91.4	152.7
0	MOFF	2.33	2	2007	3-6	0	1.7	0.687981	0.88	0.356131	180	1	709.7	7.6	182.4	23	72.6	21.4	109.7	24.6	91.4	152.7
0	MOFF	2.33	2	2007	3-6	0	1.7	0.687981	0.88	0.356131	180	1	709.7	7.6	182.4	23	72.6	21.4	109.7	24.6	91.4	152.7
0	MOFF	2.33	2	2007	3-6	0	1.7	0.687981	0.88	0.356131	180	1	709.7	7.6	182.4	23	72.6	21.4	109.7	24.6	91.4	152.7
0	MOFF	2.33	2	2007	3-6	0	1.7	0.687981	0.88	0.356131	180	1	709.7	7.6	182.4	23	72.6	21.4	109.7	24.6	91.4	152.7
0	MOFF	2.33	2	2007	3-6	0	1.7	0.687981	0.88	0.356131	180	1	709.7	7.6	182.4	23	72.6	21.4	109.7	24.6	91.4	152.7
0	MOFF	2.33	2	2007	3-6	0	1.7	0.687981	0.88	0.356131	180	1	709.7	7.6	182.4	23	72.6	21.4	109.7	24.6	91.4	152.7
0	MOFF	2.33	2	2007	3-6	0	1.7	0.687981	0.88	0.356131	180	1	709.7	7.6	182.4	23	72.6	21.4	109.7	24.6	91.4	152.7
0	MOFF	2.33	2	2007	3-6	0	1.7	0.687981	0.88	0.356131	180	1	709.7	7.6	182.4	23	72.6	21.4	109.7	24.6	91.4	152.7
0	MOFF	2.33	2	2007	3-6	0	1.7	0.687981	0.88	0.356131	180	1	709.7	7.6	182.4	23	72.6	21.4	109.7	24.6	91.4	152.7
0	MOFF	2.33	2	2007	3-6	0	1.7	0.687981	0.88	0.356131	180	1	709.7	7.6	182.4	23	72.6	21.4	109.7	24.6	91.4	152.7
1	MOFF	2.33	2	2007	3-6	0	1.7	0.687981	0.88	0.356131	180	1	709.7	7.6	182.4	23	72.6	21.4	109.7	24.6	91.4	152.7
1	MOFF	2.33	2	2007	3-6	0	1.7	0.687981	0.88	0.356131	180	1	709.7	7.6	182.4	23	72.6	21.4	109.7	24.6	91.4	152.7
1	MOFF	2.33	2	2007	3-6	0	1.7	0.687981	0.88	0.356131	180	1	709.7	7.6	182.4	23	72.6	21.4	109.7	24.6	91.4	152.7
1	MOFF	2.33	2	2007	3-6	0	1.7	0.687981	0.88	0.356131	180	1	709.7	7.6	182.4	23	72.6	21.4	109.7	24.6	91.4	152.7
0	MOFF	2.33	2	2007	7-10	1	0	0	1.22	0.493727	180	2	709.7	7.6	182.4	23	72.6	21.4	109.7	24.6	91.4	152.7
1	MOFF	2.33	2	2007	7-10	1	0	0	1.22	0.493727	180	2	709.7	7.6	182.4	23	72.6	21.4	109.7	24.6	91.4	152.7
1	MOFF	2.33	2	2007	7-10	1	0	0	1.22	0.493727	180	2	709.7	7.6	182.4	23	72.6	21.4	109.7	24.6	91.4	152.7
1	MOFF	2.33	2	2007	7-10	1	0	0	1.22	0.493727	180	2	709.7	7.6	182.4	23	72.6	21.4	109.7	24.6	91.4	152.7
0	MOFR	3	1	2003	3-6	9	0	0	0.488	0.197491	180	13	480.1	7.8	124.2	22.6	111.3	20.1	13	25.2	34.5	56.1
0	MOFR	3	1	2005	3-6	7	0	0	0.54	0.218535	180	37	510.5	8.4	155.4	23.7	112	22.3	43.4	25	43.2	173.7
0	MOFR	3	1	2005	3-6	7	0	0	0.54	0.218535	180	37	510.5	8.4	155.4	23.7	112	22.3	43.4	25	43.2	173.7
0	MOFR	3	1	2005	3-6	7	0	0	0.54	0.218535	180	37	510.5	8.4	155.4	23.7	112	22.3	43.4	25	43.2	173.7
0	MOFR	3	1	2005	3-6	7	0	0	0.54	0.218535	180	37	510.5	8.4	155.4	23.7	112	22.3	43.4	25	43.2	173.7
0	MOFR	3	1	2005	3-6	7	0	0	0.54	0.218535	180	37	510.5	8.4	155.4	23.7	112	22.3	43.4	25	43.2	173.7
0	MOFR	3	1	2005	3-6	7	0	0	0.54	0.218535	180	37	510.5	8.4	155.4	23.7	112	22.3	43.4	25	43.2	173.7
0	MOFR	3	1	2005	3-6	7	0	0	0.54	0.218535	180	37	510.5	8.4	155.4	23.7	112	22.3	43.4	25	43.2	173.7
0	MOFR	3	1	2005	3-6	7	0	0	0.54	0.218535	180	37	510.5	8.4	155.4	23.7	112	22.3	43.4	25	43.2	173.7
0	MOFR	3	1	2005	3-6	7	0	0	0.54	0.218535	180	37	510.5	8.4	155.4	23.7	112	22.3	43.4	25	43.2	173.7
0	MOFR	3	1	2005	3-6	7	0	0	0.54	0.218535	180	37	510.5	8.4	155.4	23.7	112	22.3	43.4	25	43.2	173.7
0	MOFR	3	1	2005	3-6	7	0	0	0.54	0.218535	180	37	510.5	8.4	155.4	23.7	112	22.3	43.4	25	43.2	173.7
0	MOFR	3	1	2005	3-6	7	0	0	0.54	0.218535	180	37	510.5	8.4	155.4	23.7	112	22.3	43.4	25	43.2	173.7
0	MOFR	3	1	2005	3-6	7	0	0	0.54	0.218535	180	37	510.5	8.4	155.4	23.7	112	22.3	43.4	25	43.2	173.7
0	MOFR	3	1	2005	3-6	7	0	0	0.54	0.218535	180	37	510.5	8.4	155.4	23.7	112	22.3	43.4	25	43.2	173.7
0	MOFR	3	1	2005	3-6	7	0	0	0.54	0.218535	180	37	510.5	8.4	155.4	23.7	112	22.3	43.4	25	43.2	173.7
0	MOFR	3	1	2005	3-6	7	0	0	0.54	0.218535	180	37	510.5	8.4	155.4	23.7	112	22.3	43.4	25	43.2	173.7
0	MOFR	3	1	2005	3-6	7	0	0	0.54	0.218535	180	37	510.5	8.4	155.4	23.7	112	22.3	43.4	25	43.2	173.7
1	MOFR	3	1	2005	7-10	0	1.6	0.647511	0.86	0.348037	180	38	510.5	8.4	155.4	23.7	112	22.3	43.4	25	43.2	173.7
0	MOFR	3	1	2006	3-6	9	0	0	0.86	0.348037	180	49	379.7	9.3	152.7	24.1	91.4	22.9	61.2	25.3	112	155.4
0	MOFR	3	1	2006	3-6	9	0	0	0.86	0.348037	180	49	379.7	9.3	152.7	24.1	91.4	22.9	61.2	25.3	112	155.4
0	MOFR	3	1	2006	3-6	9	0	0	0.86	0.348037	180	49	379.7	9.3	152.7	24.1	91.4	22.9	61.2	25.3	112	155.4
0	MOFR	3	1	2006	3-6	9	0	0	0.86	0.348037	180	49	379.7	9.3	152.7	24.1	91.4	22.9	61.2	25.3	112	155.4
0	MOFR	3	1	2006	3-6	9	0	0	0.86	0.348037	180	49	379.7	9.3	152.7	24.1	91.4	22.9	61.2	25.3	112	155.4
0	MOFR	3	1	2006	3-6	9	0	0	0.86	0.348037	180	49	379.7	9.3	152.7	24.1	91.4	22.9	61.2	25.3	112	155.4
0	MOFR	3	1	2006	3-6	9	0	0	0.86	0.348037	180	49	379.7	9.3	152.7	24.1	91.4	22.9	61.2	25.3	112	155.4
0	MOFR	3	1	2006	3-6	9	0	0	0.86	0.348037	180	49	379.7	9.3	152.7	24.1	91.4	22.9	61.2	25.3	112	155.4
0	MOFR	3	1	2006	3-6	9	0	0	0.86	0.348037	180	49	379.7	9.3	152.7	24.1	91.4	22.9	61.2	25.3	112	155.4
0	MOFR	3	1	2006	3-6	9	0	0	0.86	0.348037	180	49	379.7	9.3	152.7	24.1	91.4	22.9	61.2	25.3	112	155.4
0	MOFR	3	1	2006	3-6	9	0	0	0.86	0.348037	180	49	379.7	9.3	152.7	24.1	91.4	22.9	61.2	25.3	112	155.4
0	MOFR	3	1	2006	3-6	9	0	0	0.86	0.348037	180	49	379.7	9.3	152.7	24.1	91.4	22.9	61.2	25.3	112	155.4
1	MOFR	3	1	2006	3-6	9	0	0	0.86	0.348037	180	49	379.7	9.3	152.7	24.1	91.4	22.9	61.2	25.3	112	155.4
0	MOFR	3	1	2006	7-10	10	0	0	0.86	0.348037	180	50	379.7	9.3	152.7	24.1	91.4	22.9	61.2	25.3	112	155.4
1	MOFR	3	1	2006	7-10	10	0	0	0.86	0.348037	180	50	379.7	9.3	152.7	24.1	91.4	22.9	61.2	25.3	112	155.4
1	MOFR	3	1	2006	7-10	10	0	0	0.86	0.348037	180	50	379.7	9.3	152.7	24.1	91.4	22.9	61.2	25.3	112	155.4
0	MOFR	3	1	2007	3-6	21	0	0	0.66	0.267098	180	61	709.7	7.6	182.4	23	72.6	21.4	109.7	24.6	91.4	152.7
0	MOFR	3	1	2007	3-6	21	0	0	0.66	0.267098	180	61	709.7	7.6	182.4	23	72.6	21.4	109.7	24.6	91.4	152.7
0	MOFR	3	1	2007	3-6	21	0	0	0.66	0.267098	180	61	709.7	7.6	182.4	23	72.6	21.4	109.7	24.6	91.4	152.7
0	MOFR	3	1	2007	3-6	21	0	0	0.66	0.267098	180	61	709.7	7.6	182.4	23	72.6	21.4	109.7	24.6	91.4	152.7
0	MOFR	3	1	2007	3-6	21	0	0	0.66	0.267098	180	61	709.7	7.6	182.4	23	72.6	21.4	109.7	24.6	91.4	152.7
1	MOFR	3	1	2007	3-6	21	0	0	0.66	0.267098	180	61	709.7	7.6	182.4	23	72.6	21.4	109.7	24.6	91.4	152.7
0	MOFR	3	1	2007	7-10	22	0	0	0.66	0.267098	180	62	709.7	7.6	182.4	23	72.6	21.4	109.7	24.6	91.4	152.7
0	MOFR	3	1	2007	7-10	22	0	0	0.66	0.267098	180	62	709.7	7.6	182.4	23	72.6	21.4	109.7	24.6	91.4	152.7
0	MOFR	3	1	2007	7-10	22	0	0	0.66	0.267098	180	62	709.7	7.6	182.4	23	72.6	21.4	109.7	24.6	91.4	152.7
1	MOFR	3	1	2007	7-10	22	0	0	0.66	0.267098	180	62	709.7	7.6	182.4	23	72.6	21.4	109.7	24.6	91.4	152.7
1	MOFR	3	1	2007	7-10	22	0	0	0.66	0.267098	180	62	709.7	7.6	182.4	23	72.6	21.4	109.7	24.6	91.4	152.7
1	MOFR	3	1	2007	7-10	22	0	0	0.66	0.267098	180	62	709.7	7.6	182.4	23	72.6	21.4	109.7	24.6	91.4	152.7
0	MOFN	2.5	1	2004	3-6	7	0	0	0.914	0.369891	180	13	378	8.2	173.7	20.9	43.2	19.7	130.6	22.2	111.3	124.2
0	MOFN	2.5	1	2004	3-6	7	0	0	0.914	0.369891	180	13	378	8.2	173.7	20.9	43.2	19.7	130.6	22.2	111.3	124.2
0	MOFN	2.5	1	2004	3-6	7	0	0	0.914	0.369891	180	13	378	8.2	173.7	20.9	43.2	19.7	130.6	22.2	111.3	124.2
0	MOFN	2.5	1	2004	3-6	7	0	0	0.914	0.369891	180	13	378	8.2	173.7	20.9	43.2	19.7	130.6	22.2	111.3	124.2
0	MOFN	2.5	1	2004	7-10	0	1.5	0.607042	1.214	0.491299	180	14	378	8.2	173.7	20.9	43.2	19.7	130.6	22.2	111.3	124.2
0	MOFN	2.5	1	2004	7-10	0	1.5	0.607042	1.214	0.491299	180	14	378	8.2	173.7	20.9	43.2	19.7	130.6	22.2	111.3	124.2
1	MOFN	2.5	1	2004	7-10	0	1.5	0.607042	1.214	0.491299	180	14	378	8.2	173.7	20.9	43.2	19.7	130.6	22.2	111.3	124.2
0	MOFN	2.5	1	2005	3-6	9	0	0	1.06	0.428976	180	25	510.5	8.4	155.4	23.7	112	22.3	43.4	25	43.2	173.7
0	MOFN	2.5	1	2005	3-6	9	0	0	1.06	0.428976	180	25	510.5	8.4	155.4	23.7	112	22.3	43.4	25	43.2	173.7
0	MOFN	2.5	1	2005	3-6	9	0	0	1.06	0.428976	180	25	510.5	8.4	155.4	23.7	112	22.3	43.4	25	43.2	173.7
0	MOFN	2.5	1	2005	3-6	9	0	0	1.06	0.428976	180	25	510.5	8.4	155.4	23.7	112	22.3	43.4	25	43.2	173.7
0	MOFN	2.5	1	2005	3-6	9	0	0	1.06	0.428976	180	25	510.5	8.4	155.4	23.7	112	22.3	43.4	25	43.2	173.7
0	MOFN	2.5	1	2005	3-6	9	0	0	1.06	0.428976	180	25	510.5	8.4	155.4	23.7	112	22.3	43.4	25	43.2	173.7
0	MOFN	2.5	1	2005	7-10	10	0	0	1.06	0.428976	180	26	510.5	8.4	155.4	23.7	112	22.3	43.4	25	43.2	173.7
0	MOFN	2.5	1	2005	7-10	10	0	0	1.06	0.428976	180	26	510.5	8.4	155.4	23.7	112	22.3	43.4	25	43.2	173.7
1	MOFN	2.5	1	2005	7-10	10	0	0	1.06	0.428976	180	26	510.5	8.4	155.4	23.7	112	22.3	43.4	25	43.2	173.7
1	MOFN	2.5	1	2005	7-10	10	0	0	1.06	0.428976	180	26	510.5	8.4	155.4	23.7	112	22.3	43.4	25	43.2	173.7
0	MOFN	2.5	1	2006	3-6	21	0	0	0.74	0.299474	180	37	379.7	9.3	152.7	24.1	91.4	22.9	61.2	25.3	112	155.4
0	MOFN	2.5	1	2006	3-6	21	0	0	0.74	0.299474	180	37	379.7	9.3	152.7	24.1	91.4	22.9	61.2	25.3	112	155.4
0	MOFN	2.5	1	2006	3-6	21	0	0	0.74	0.299474	180	37	379.7	9.3	152.7	24.1	91.4	22.9	61.2	25.3	112	155.4
0	MOFN	2.5	1	2006	3-6	21	0	0	0.74	0.299474	180	37	379.7	9.3	152.7	24.1	91.4	22.9	61.2	25.3	112	155.4
0	MOFN	2.5	1	2006	3-6	21	0	0	0.74	0.299474	180	37	379.7	9.3	152.7	24.1	91.4	22.9	61.2	25.3	112	155.4
0	MOFN	2.5	1	2006	3-6	21	0	0	0.74	0.299474	180	37	379.7	9.3	152.7	24.1	91.4	22.9	61.2	25.3	112	155.4
0	MOFN	2.5	1	2006	3-6	21	0	0	0.74	0.299474	180	37	379.7	9.3	152.7	24.1	91.4	22.9	61.2	25.3	112	155.4
0	MOFN	2.5	1	2006	7-10	22	0	0	0.74	0.299474	180	38	379.7	9.3	152.7	24.1	91.4	22.9	61.2	25.3	112	155.4
0	MOFN	2.5	1	2007	7-10	22	0	0	0.74	0.299474	180	38	379.7	9.3	152.7	24.1	91.4	22.9	61.2	25.3	91.4	152.7
0	MOFN	2.5	1	2007	7-10	22	0	0	0.74	0.299474	180	38	379.7	9.3	152.7	24.1	91.4	22.9	61.2	25.3	91.4	152.7
0	MOFN	2.5	1	2007	7-10	22	0	0	0.74	0.299474	180	38	379.7	9.3	152.7	24.1	91.4	22.9	61.2	25.3	91.4	152.7
0	NOME	2.67	1	2003	3-6	180	0	0	0	0	46	37	480.1	7.8	124.2	22.6	111.3	20.1	13	25.2	34.5	56.1
0	NOME	2.67	1	2004	3-6	180	0	0	0	0	58	1	378	8.2	173.7	20.9	43.2	19.7	130.6	22.2	111.3	124.2
0	NOME	2.67	1	2004	3-6	180	0	0	0	0	58	1	378	8.2	173.7	20.9	43.2	19.7	130.6	22.2	111.3	124.2
0	NOME	2.67	1	2004	3-6	180	0	0	0	0	58	1	378	8.2	173.7	20.9	43.2	19.7	130.6	22.2	111.3	124.2
0	NOME	2.67	1	2004	3-6	180	0	0	0	0	58	1	378	8.2	173.7	20.9	43.2	19.7	130.6	22.2	111.3	124.2
0	NOME	2.67	1	2004	3-6	180	0	0	0	0	58	1	378	8.2	173.7	20.9	43.2	19.7	130.6	22.2	111.3	124.2
0	NOME	2.67	1	2004	3-6	180	0	0	0	0	58	1	378	8.2	173.7	20.9	43.2	19.7	130.6	22.2	111.3	124.2
0	NOME	2.67	1	2004	3-6	180	0	0	0	0	58	1	378	8.2	173.7	20.9	43.2	19.7	130.6	22.2	111.3	124.2
0	NOME	2.67	1	2004	3-6	180	0	0	0	0	58	1	378	8.2	173.7	20.9	43.2	19.7	130.6	22.2	111.3	124.2
0	NOME	2.67	1	2005	3-6	180	0	0	0	0	10	13	510.5	8.4	155.4	23.7	112	22.3	43.4	25	43.2	173.7
0	NOME	2.67	1	2005	3-6	180	0	0	0	0	10	13	510.5	8.4	155.4	23.7	112	22.3	43.4	25	43.2	173.7
0	NOME	2.67	1	2005	3-6	180	0	0	0	0	10	13	510.5	8.4	155.4	23.7	112	22.3	43.4	25	43.2	173.7
0	NOME	2.67	1	2005	3-6	180	0	0	0	0	10	13	510.5	8.4	155.4	23.7	112	22.3	43.4	25	43.2	173.7
0	NOME	2.67	1	2005	3-6	180	0	0	0	0	10	13	510.5	8.4	155.4	23.7	112	22.3	43.4	25	43.2	173.7
0	NOME	2.67	1	2005	3-6	180	0	0	0	0	10	13	510.5	8.4	155.4	23.7	112	22.3	43.4	25	43.2	173.7
0	NOME	2.67	1	2005	3-6	180	0	0	0	0	10	13	510.5	8.4	155.4	23.7	112	22.3	43.4	25	43.2	173.7
0	NOME	2.67	1	2005	3-6	180	0	0	0	0	10	13	510.5	8.4	155.4	23.7	112	22.3	43.4	25	43.2	173.7
0	NOME	2.67	1	2005	3-6	180	0	0	0	0	10	13	510.5	8.4	155.4	23.7	112	22.3	43.4	25	43.2	173.7
0	NOME	2.67	1	2005	3-6	180	0	0	0	0	10	13	510.5	8.4	155.4	23.7	112	22.3	43.4	25	43.2	173.7
0	NOME	2.67	1	2005	3-6	180	0	0	0	0	10	13	510.5	8.4	155.4	23.7	112	22.3	43.4	25	43.2	173.7
0	NOME	2.67	1	2005	3-6	180	0	0	0	0	10	13	510.5	8.4	155.4	23.7	112	22.3	43.4	25	43.2	173.7
0	NOME	2.67	1	2005	7-10	180	0	0	0	0	11	14	510.5	8.4	155.4	23.7	112	22.3	43.4	25	43.2	173.7
0	NOME	2.67	1	2006	3-6	180	0	0	0	0	10	25	379.7	9.3	152.7	24.1	91.4	22.9	61.2	25.3	112	155.4
0	NOME	2.67	1	2006	7-10	180	0	0	0	0	11	26	379.7	9.3	152.7	24.1	91.4	22.9	61.2	25.3	112	155.4
0	NOME	2.67	1	2007	3-6	0	1.5	0.607042	0.3	0.121408	10	2	709.7	7.6	182.4	23	72.6	21.4	109.7	24.6	91.4	152.7
0	NOME	2.67	1	2007	3-6	0	1.5	0.607042	0.3	0.121408	10	2	709.7	7.6	182.4	23	72.6	21.4	109.7	24.6	91.4	152.7
0	NOME	2.67	1	2007	3-6	0	1.5	0.607042	0.3	0.121408	10	2	709.7	7.6	182.4	23	72.6	21.4	109.7	24.6	91.4	152.7
0	NOME	2.67	1	2007	3-6	0	1.5	0.607042	0.3	0.121408	10	2	709.7	7.6	182.4	23	72.6	21.4	109.7	24.6	91.4	152.7
0	NOME	2.67	1	2007	3-6	0	1.5	0.607042	0.3	0.121408	10	2	709.7	7.6	182.4	23	72.6	21.4	109.7	24.6	91.4	152.7
0	NOME	2.67	1	2007	3-6	0	1.5	0.607042	0.3	0.121408	10	2	709.7	7.6	182.4	23	72.6	21.4	109.7	24.6	91.4	152.7
0	NOME	2.67	1	2007	3-6	0	1.5	0.607042	0.3	0.121408	10	2	709.7	7.6	182.4	23	72.6	21.4	109.7	24.6	91.4	152.7
0	NOME	2.67	1	2018	3-6	1	0	0	0.89	0.360178	127	25	570.5	7.3	223	23.7	124.7	24	98.3	23.4	48.3	127.3
0	NOME	2.67	1	2018	3-6	1	0	0	0.89	0.360178	127	25	570.5	7.3	223	23.7	124.7	24	98.3	23.4	48.3	127.3
0	NOME	2.67	1	2018	3-6	1	0	0	0.89	0.360178	127	25	570.5	7.3	223	23.7	124.7	24	98.3	23.4	48.3	127.3
0	NOME	2.67	1	2018	3-6	1	0	0	0.89	0.360178	127	25	570.5	7.3	223	23.7	124.7	24	98.3	23.4	48.3	127.3
0	NOME	2.67	1	2019	7-10	0	0.74	0.299474	1.05	0.424929	0	37	702.1	6.5	252.2	22.7	114.3	21.2	137.9	24.3	124.7	223
1	NOME	2.67	1	2019	7-10	0	0.74	0.299474	1.05	0.424929	0	37	702.1	6.5	252.2	22.7	114.3	21.2	137.9	24.3	124.7	223
0	WRBS	2.33	1	2003	3-6	0	2	0.809389	1.24	0.501821	180	1	480.1	7.8	124.2	22.6	111.3	20.1	13	25.2	34.5	56.1
0	WRBS	2.33	1	2003	3-6	0	2	0.809389	1.24	0.501821	180	1	480.1	7.8	124.2	22.6	111.3	20.1	13	25.2	34.5	56.1
0	WRBS	2.33	1	2004	3-6	10	0	0	0.78	0.315662	180	13	378	8.2	173.7	20.9	43.2	19.7	130.6	22.2	111.3	124.2
0	WRBS	2.33	1	2004	3-6	10	0	0	0.78	0.315662	180	13	378	8.2	173.7	20.9	43.2	19.7	130.6	22.2	111.3	124.2
0	WRBS	2.33	1	2006	3-6	8	0	0	0.92	0.372319	180	37	379.7	9.3	152.7	24.1	91.4	22.9	61.2	25.3	112	155.4
0	WRBS	2.33	1	2006	3-6	8	0	0	0.92	0.372319	180	37	379.7	9.3	152.7	24.1	91.4	22.9	61.2	25.3	112	155.4
0	WRBS	2.33	1	2006	3-6	8	0	0	0.92	0.372319	180	37	379.7	9.3	152.7	24.1	91.4	22.9	61.2	25.3	112	155.4
0	WRBS	2.33	1	2006	3-6	8	0	0	0.92	0.372319	180	37	379.7	9.3	152.7	24.1	91.4	22.9	61.2	25.3	112	155.4
0	WRBS	2.33	1	2006	3-6	8	0	0	0.92	0.372319	180	37	379.7	9.3	152.7	24.1	91.4	22.9	61.2	25.3	112	155.4
0	WRBS	2.33	1	2006	3-6	8	0	0	0.92	0.372319	180	37	379.7	9.3	152.7	24.1	91.4	22.9	61.2	25.3	112	155.4
0	WRBS	2.33	1	2006	3-6	8	0	0	0.92	0.372319	180	37	379.7	9.3	152.7	24.1	91.4	22.9	61.2	25.3	112	155.4
0	WRBS	2.33	1	2006	3-6	8	0	0	0.92	0.372319	180	37	379.7	9.3	152.7	24.1	91.4	22.9	61.2	25.3	112	155.4
1	WRPM	3	2	2003	3-6	180	0	0	0	0	10	37	480.1	7.8	124.2	22.6	111.3	20.1	13	25.2	34.5	56.1
0	WRPM	3	2	2004	3-6	180	0	0	0	0	10	49	378	8.2	173.7	20.9	43.2	19.7	130.6	22.2	111.3	124.2
0	WRPM	3	2	2004	3-6	180	0	0	0	0	10	49	378	8.2	173.7	20.9	43.2	19.7	130.6	22.2	111.3	124.2
0	WRPM	3	2	2004	3-6	180	0	0	0	0	10	49	378	8.2	173.7	20.9	43.2	19.7	130.6	22.2	111.3	124.2
0	WRPM	3	2	2004	3-6	180	0	0	0	0	10	49	378	8.2	173.7	20.9	43.2	19.7	130.6	22.2	111.3	124.2
0	WRPM	3	2	2004	3-6	180	0	0	0	0	10	49	378	8.2	173.7	20.9	43.2	19.7	130.6	22.2	111.3	124.2
0	WRPM	3	2	2004	7-10	180	0	0	0	0	11	50	378	8.2	173.7	20.9	43.2	19.7	130.6	22.2	111.3	124.2
0	WRPM	3	2	2005	3-6	180	0	0	0	0	22	61	510.5	8.4	155.4	23.7	112	22.3	43.4	25	43.2	173.7
0	WRPM	3	2	2005	3-6	180	0	0	0	0	22	61	510.5	8.4	155.4	23.7	112	22.3	43.4	25	43.2	173.7
0	WRPM	3	2	2005	3-6	180	0	0	0	0	22	61	510.5	8.4	155.4	23.7	112	22.3	43.4	25	43.2	173.7
0	WRPM	3	2	2005	3-6	180	0	0	0	0	22	61	510.5	8.4	155.4	23.7	112	22.3	43.4	25	43.2	173.7
0	WRPM	3	2	2005	3-6	180	0	0	0	0	22	61	510.5	8.4	155.4	23.7	112	22.3	43.4	25	43.2	173.7
0	WRPM	3	2	2005	3-6	180	0	0	0	0	22	61	510.5	8.4	155.4	23.7	112	22.3	43.4	25	43.2	173.7
0	WRPM	3	2	2005	3-6	180	0	0	0	0	22	61	510.5	8.4	155.4	23.7	112	22.3	43.4	25	43.2	173.7
0	WRPM	3	2	2005	3-6	180	0	0	0	0	22	61	510.5	8.4	155.4	23.7	112	22.3	43.4	25	43.2	173.7
0	WRPM	3	2	2005	3-6	180	0	0	0	0	22	61	510.5	8.4	155.4	23.7	112	22.3	43.4	25	43.2	173.7
0	WRPM	3	2	2005	7-10	180	0	0	0	0	23	62	510.5	8.4	155.4	23.7	112	22.3	43.4	25	43.2	173.7
0	WRPM	3	2	2005	7-10	180	0	0	0	0	23	62	510.5	8.4	155.4	23.7	112	22.3	43.4	25	43.2	173.7
0	WRPM	3	2	2006	3-6	180	0	0	0	0	34	73	379.7	9.3	152.7	24.1	91.4	22.9	61.2	25.3	112	155.4
0	WRPM	3	2	2006	3-6	180	0	0	0	0	34	73	379.7	9.3	152.7	24.1	91.4	22.9	61.2	25.3	112	155.4
0	WRPM	3	2	2006	3-6	180	0	0	0	0	34	73	379.7	9.3	152.7	24.1	91.4	22.9	61.2	25.3	112	155.4
0	WRPM	3	2	2006	3-6	180	0	0	0	0	34	73	379.7	9.3	152.7	24.1	91.4	22.9	61.2	25.3	112	155.4
0	WRPM	3	2	2006	3-6	180	0	0	0	0	34	73	379.7	9.3	152.7	24.1	91.4	22.9	61.2	25.3	112	155.4
0	WRPM	3	2	2006	3-6	180	0	0	0	0	34	73	379.7	9.3	152.7	24.1	91.4	22.9	61.2	25.3	112	155.4
0	WRPM	3	2	2006	3-6	180	0	0	0	0	34	73	379.7	9.3	152.7	24.1	91.4	22.9	61.2	25.3	112	155.4
0	WRPM	3	2	2006	3-6	180	0	0	0	0	34	73	379.7	9.3	152.7	24.1	91.4	22.9	61.2	25.3	112	155.4
0	WRPM	3	2	2006	3-6	180	0	0	0	0	34	73	379.7	9.3	152.7	24.1	91.4	22.9	61.2	25.3	112	155.4
0	WRPM	3	2	2007	3-6	0	1.5	0.607042	0	0	46	1	709.7	7.6	182.4	23	72.6	21.4	109.7	24.6	91.4	152.7
0	WRPM	3	2	2007	3-6	0	1.5	0.607042	0	0	46	1	709.7	7.6	182.4	23	72.6	21.4	109.7	24.6	91.4	152.7
0	WRPM	3	2	2007	3-6	0	1.5	0.607042	0	0	46	1	709.7	7.6	182.4	23	72.6	21.4	109.7	24.6	91.4	152.7
0	WRPM	3	2	2007	3-6	0	1.5	0.607042	0	0	46	1	709.7	7.6	182.4	23	72.6	21.4	109.7	24.6	91.4	152.7
0	WRPM	3	2	2007	7-10	0	1.5	0.607042	0	0	47	2	709.7	7.6	182.4	23	72.6	21.4	109.7	24.6	91.4	152.7
0	WRPM	3	2	2017	3-6	67	0	0	0	0	9	110	444.2	9.1	127.3	24	48.3	22.9	79	25	16	124.2
0	WRPM	3	2	2017	3-6	67	0	0	0	0	9	110	444.2	9.1	127.3	24	48.3	22.9	79	25	16	124.2
0	WRPM	3	2	2017	7-10	68	0	0	0	0	10	111	444.2	9.1	127.3	24	48.3	22.9	79	25	16	124.2
1	WRPM	3	2	2017	7-10	68	0	0	0	0	10	111	444.2	9.1	127.3	24	48.3	22.9	79	25	16	124.2
0	MOFT	4	1	2003	3-6	0	1.7	0.687981	0.322	0.130312	180	25	480.1	7.8	124.2	22.6	111.3	20.1	13	25.2	34.5	56.1
0	MOFT	4	1	2003	3-6	0	1.7	0.687981	0.322	0.130312	180	25	480.1	7.8	124.2	22.6	111.3	20.1	13	25.2	34.5	56.1
0	MOFT	4	1	2003	3-6	0	1.7	0.687981	0.322	0.130312	180	25	480.1	7.8	124.2	22.6	111.3	20.1	13	25.2	34.5	56.1
0	MOFT	4	1	2003	3-6	0	1.7	0.687981	0.322	0.130312	180	25	480.1	7.8	124.2	22.6	111.3	20.1	13	25.2	34.5	56.1
0	MOFT	4	1	2003	3-6	0	1.7	0.687981	0.322	0.130312	180	25	480.1	7.8	124.2	22.6	111.3	20.1	13	25.2	34.5	56.1
0	MOFT	4	1	2003	3-6	0	1.7	0.687981	0.322	0.130312	180	25	480.1	7.8	124.2	22.6	111.3	20.1	13	25.2	34.5	56.1
0	MOFT	4	1	2003	3-6	0	1.7	0.687981	0.322	0.130312	180	25	480.1	7.8	124.2	22.6	111.3	20.1	13	25.2	34.5	56.1
1	MOFT	4	1	2003	3-6	0	1.7	0.687981	0.322	0.130312	180	25	480.1	7.8	124.2	22.6	111.3	20.1	13	25.2	34.5	56.1
0	MOFT	4	1	2004	3-6	7	0	0	0.674	0.272764	180	2	378	8.2	173.7	20.9	43.2	19.7	130.6	22.2	111.3	124.2
0	MOFT	4	1	2004	3-6	7	0	0	0.674	0.272764	180	2	378	8.2	173.7	20.9	43.2	19.7	130.6	22.2	111.3	124.2
0	MOFT	4	1	2004	3-6	7	0	0	0.674	0.272764	180	2	378	8.2	173.7	20.9	43.2	19.7	130.6	22.2	111.3	124.2
0	MOFT	4	1	2004	3-6	7	0	0	0.674	0.272764	180	2	378	8.2	173.7	20.9	43.2	19.7	130.6	22.2	111.3	124.2
0	MOFT	4	1	2004	3-6	7	0	0	0.674	0.272764	180	2	378	8.2	173.7	20.9	43.2	19.7	130.6	22.2	111.3	124.2
0	MOFT	4	1	2004	3-6	7	0	0	0.674	0.272764	180	2	378	8.2	173.7	20.9	43.2	19.7	130.6	22.2	111.3	124.2
1	MOFT	4	1	2004	3-6	7	0	0	0.674	0.272764	180	2	378	8.2	173.7	20.9	43.2	19.7	130.6	22.2	111.3	124.2
0	MOFT	4	1	2004	7-10	0	1	0.404694	0.674	0.272764	180	3	378	8.2	173.7	20.9	43.2	19.7	130.6	22.2	111.3	124.2
0	MOFT	4	1	2004	7-10	0	1	0.404694	0.674	0.272764	180	3	378	8.2	173.7	20.9	43.2	19.7	130.6	22.2	111.3	124.2
0	MOFT	4	1	2005	3-6	9	0	0	0.52	0.210441	180	14	510.5	8.4	155.4	23.7	112	22.3	43.4	25	43.2	173.7
0	MOFT	4	1	2005	3-6	9	0	0	0.52	0.210441	180	14	510.5	8.4	155.4	23.7	112	22.3	43.4	25	43.2	173.7
0	MOFT	4	1	2005	3-6	9	0	0	0.52	0.210441	180	14	510.5	8.4	155.4	23.7	112	22.3	43.4	25	43.2	173.7
0	MOFT	4	1	2005	3-6	9	0	0	0.52	0.210441	180	14	510.5	8.4	155.4	23.7	112	22.3	43.4	25	43.2	173.7
0	MOFT	4	1	2005	3-6	9	0	0	0.52	0.210441	180	14	510.5	8.4	155.4	23.7	112	22.3	43.4	25	43.2	173.7
0	MOFT	4	1	2005	3-6	9	0	0	0.52	0.210441	180	14	510.5	8.4	155.4	23.7	112	22.3	43.4	25	43.2	173.7
0	MOFT	4	1	2005	3-6	9	0	0	0.52	0.210441	180	14	510.5	8.4	155.4	23.7	112	22.3	43.4	25	43.2	173.7
0	MOFT	4	1	2005	3-6	9	0	0	0.52	0.210441	180	14	510.5	8.4	155.4	23.7	112	22.3	43.4	25	43.2	173.7
0	MOFT	4	1	2005	3-6	9	0	0	0.52	0.210441	180	14	510.5	8.4	155.4	23.7	112	22.3	43.4	25	43.2	173.7
0	MOFT	4	1	2005	3-6	9	0	0	0.52	0.210441	180	14	510.5	8.4	155.4	23.7	112	22.3	43.4	25	43.2	173.7
0	MOFT	4	1	2005	3-6	9	0	0	0.52	0.210441	180	14	510.5	8.4	155.4	23.7	112	22.3	43.4	25	43.2	173.7
0	MOFT	4	1	2005	3-6	9	0	0	0.52	0.210441	180	14	510.5	8.4	155.4	23.7	112	22.3	43.4	25	43.2	173.7
0	MOFT	4	1	2005	3-6	9	0	0	0.52	0.210441	180	14	510.5	8.4	155.4	23.7	112	22.3	43.4	25	43.2	173.7
0	MOFT	4	1	2005	3-6	9	0	0	0.52	0.210441	180	14	510.5	8.4	155.4	23.7	112	22.3	43.4	25	43.2	173.7
1	MOFT	4	1	2005	3-6	9	0	0	0.52	0.210441	180	14	510.5	8.4	155.4	23.7	112	22.3	43.4	25	43.2	173.7
0	MOFT	4	1	2005	7-10	10	0	0	0.82	0.331849	180	15	510.5	8.4	155.4	23.7	112	22.3	43.4	25	43.2	173.7
0	MOFT	4	1	2005	7-10	10	0	0	0.82	0.331849	180	15	510.5	8.4	155.4	23.7	112	22.3	43.4	25	43.2	173.7
0	MOFT	4	1	2005	7-10	10	0	0	0.82	0.331849	180	15	510.5	8.4	155.4	23.7	112	22.3	43.4	25	43.2	173.7
0	MOFT	4	1	2005	7-10	10	0	0	0.82	0.331849	180	15	510.5	8.4	155.4	23.7	112	22.3	43.4	25	43.2	173.7
0	MOFT	4	1	2005	7-10	10	0	0	0.82	0.331849	180	15	510.5	8.4	155.4	23.7	112	22.3	43.4	25	43.2	173.7
0	MOFT	4	1	2005	7-10	10	0	0	0.82	0.331849	180	15	510.5	8.4	155.4	23.7	112	22.3	43.4	25	43.2	173.7
0	MOFT	4	1	2005	7-10	10	0	0	0.82	0.331849	180	15	510.5	8.4	155.4	23.7	112	22.3	43.4	25	43.2	173.7
1	MOFT	4	1	2005	7-10	10	0	0	0.82	0.331849	180	15	510.5	8.4	155.4	23.7	112	22.3	43.4	25	43.2	173.7
1	MOFT	4	1	2005	7-10	10	0	0	0.82	0.331849	180	15	510.5	8.4	155.4	23.7	112	22.3	43.4	25	43.2	173.7
0	MOFT	4	1	2006	3-6	0	1.7	0.687981	0.82	0.331849	180	26	379.7	9.3	152.7	24.1	91.4	22.9	61.2	25.3	112	155.4
0	MOFT	4	1	2006	3-6	0	1.7	0.687981	0.82	0.331849	180	26	379.7	9.3	152.7	24.1	91.4	22.9	61.2	25.3	112	155.4
0	MOFT	4	1	2006	3-6	0	1.7	0.687981	0.82	0.331849	180	26	379.7	9.3	152.7	24.1	91.4	22.9	61.2	25.3	112	155.4
0	MOFT	4	1	2006	3-6	0	1.7	0.687981	0.82	0.331849	180	26	379.7	9.3	152.7	24.1	91.4	22.9	61.2	25.3	112	155.4
0	MOFT	4	1	2006	3-6	0	1.7	0.687981	0.82	0.331849	180	26	379.7	9.3	152.7	24.1	91.4	22.9	61.2	25.3	112	155.4
0	MOFT	4	1	2006	3-6	0	1.7	0.687981	0.82	0.331849	180	26	379.7	9.3	152.7	24.1	91.4	22.9	61.2	25.3	112	155.4
0	MOFT	4	1	2006	3-6	0	1.7	0.687981	0.82	0.331849	180	26	379.7	9.3	152.7	24.1	91.4	22.9	61.2	25.3	112	155.4
0	MOFT	4	1	2006	7-10	1	0	0	0.82	0.331849	180	27	379.7	9.3	152.7	24.1	91.4	22.9	61.2	25.3	112	155.4
0	MOFT	4	1	2006	7-10	1	0	0	0.82	0.331849	180	27	379.7	9.3	152.7	24.1	91.4	22.9	61.2	25.3	112	155.4
1	MOFT	4	1	2006	7-10	1	0	0	0.82	0.331849	180	27	379.7	9.3	152.7	24.1	91.4	22.9	61.2	25.3	112	155.4
1	MOFT	4	1	2006	7-10	1	0	0	0.82	0.331849	180	27	379.7	9.3	152.7	24.1	91.4	22.9	61.2	25.3	112	155.4
0	MOFT	4	1	2007	3-6	7	0	0	1.16	0.469446	180	1	709.7	7.6	182.4	23	72.6	21.4	109.7	24.6	91.4	152.7
0	MOFT	4	1	2007	3-6	7	0	0	1.16	0.469446	180	1	709.7	7.6	182.4	23	72.6	21.4	109.7	24.6	91.4	152.7
0	MOFT	4	1	2007	3-6	7	0	0	1.16	0.469446	180	1	709.7	7.6	182.4	23	72.6	21.4	109.7	24.6	91.4	152.7
0	MOFT	4	1	2007	3-6	7	0	0	1.16	0.469446	180	1	709.7	7.6	182.4	23	72.6	21.4	109.7	24.6	91.4	152.7
0	MOFT	4	1	2007	3-6	7	0	0	1.16	0.469446	180	1	709.7	7.6	182.4	23	72.6	21.4	109.7	24.6	91.4	152.7
0	MOFT	4	1	2007	3-6	7	0	0	1.16	0.469446	180	1	709.7	7.6	182.4	23	72.6	21.4	109.7	24.6	91.4	152.7
0	MOFT	4	1	2007	3-6	7	0	0	1.16	0.469446	180	1	709.7	7.6	182.4	23	72.6	21.4	109.7	24.6	91.4	152.7
0	MOFT	4	1	2007	3-6	7	0	0	1.16	0.469446	180	1	709.7	7.6	182.4	23	72.6	21.4	109.7	24.6	91.4	152.7
0	MOFT	4	1	2007	3-6	7	0	0	1.16	0.469446	180	1	709.7	7.6	182.4	23	72.6	21.4	109.7	24.6	91.4	152.7
0	MOFT	4	1	2007	3-6	7	0	0	1.16	0.469446	180	1	709.7	7.6	182.4	23	72.6	21.4	109.7	24.6	91.4	152.7
1	MOFT	4	1	2007	3-6	7	0	0	1.16	0.469446	180	1	709.7	7.6	182.4	23	72.6	21.4	109.7	24.6	91.4	152.7
0	MOFT	4	1	2007	7-10	0	1.7	0.687981	1.16	0.469446	180	2	709.7	7.6	182.4	23	72.6	21.4	109.7	24.6	91.4	152.7
0	MOFT	4	1	2007	7-10	0	1.7	0.687981	1.16	0.469446	180	2	709.7	7.6	182.4	23	72.6	21.4	109.7	24.6	91.4	152.7
0	MOFT	4	1	2007	7-10	0	1.7	0.687981	1.16	0.469446	180	2	709.7	7.6	182.4	23	72.6	21.4	109.7	24.6	91.4	152.7
0	MOFT	4	1	2007	7-10	0	1.7	0.687981	1.16	0.469446	180	2	709.7	7.6	182.4	23	72.6	21.4	109.7	24.6	91.4	152.7
0	MOFT	4	1	2007	7-10	0	1.7	0.687981	1.16	0.469446	180	2	709.7	7.6	182.4	23	72.6	21.4	109.7	24.6	91.4	152.7
1	MOFT	4	1	2007	7-10	0	1.7	0.687981	1.16	0.469446	180	2	709.7	7.6	182.4	23	72.6	21.4	109.7	24.6	91.4	152.7
1	MOFT	4	1	2007	7-10	0	1.7	0.687981	1.16	0.469446	180	2	709.7	7.6	182.4	23	72.6	21.4	109.7	24.6	91.4	152.7
1	MOFT	4	1	2007	7-10	0	1.7	0.687981	1.16	0.469446	180	2	709.7	7.6	182.4	23	72.6	21.4	109.7	24.6	91.4	152.7
0	MOPT	3.5	1	2005	3-6	0	1.7	0.687981	0.936	0.378794	180	1	510.5	8.4	155.4	23.7	112	22.3	43.4	25	43.2	173.7
0	MOPT	3.5	1	2005	3-6	0	1.7	0.687981	0.936	0.378794	180	1	510.5	8.4	155.4	23.7	112	22.3	43.4	25	43.2	173.7
0	MOPT	3.5	1	2005	3-6	0	1.7	0.687981	0.936	0.378794	180	1	510.5	8.4	155.4	23.7	112	22.3	43.4	25	43.2	173.7
0	MOPT	3.5	1	2005	3-6	0	1.7	0.687981	0.936	0.378794	180	1	510.5	8.4	155.4	23.7	112	22.3	43.4	25	43.2	173.7
0	MOPT	3.5	1	2005	3-6	0	1.7	0.687981	0.936	0.378794	180	1	510.5	8.4	155.4	23.7	112	22.3	43.4	25	43.2	173.7
0	MOPT	3.5	1	2005	3-6	0	1.7	0.687981	0.936	0.378794	180	1	510.5	8.4	155.4	23.7	112	22.3	43.4	25	43.2	173.7
0	MOPT	3.5	1	2005	3-6	0	1.7	0.687981	0.936	0.378794	180	1	510.5	8.4	155.4	23.7	112	22.3	43.4	25	43.2	173.7
0	MOPT	3.5	1	2005	7-10	1	0	0	0.936	0.378794	180	2	510.5	8.4	155.4	23.7	112	22.3	43.4	25	43.2	173.7
1	MOPT	3.5	1	2005	7-10	1	0	0	0.936	0.378794	180	2	510.5	8.4	155.4	23.7	112	22.3	43.4	25	43.2	173.7
1	MOPT	3.5	1	2005	7-10	1	0	0	0.936	0.378794	180	2	510.5	8.4	155.4	23.7	112	22.3	43.4	25	43.2	173.7
0	MOPT	3.5	1	2006	3-6	7	0	0	0.88	0.356131	180	13	379.7	9.3	152.7	24.1	91.4	22.9	61.2	25.3	112	155.4
0	MOPT	3.5	1	2006	3-6	7	0	0	0.88	0.356131	180	13	379.7	9.3	152.7	24.1	91.4	22.9	61.2	25.3	112	155.4
0	MOPT	3.5	1	2006	3-6	7	0	0	0.88	0.356131	180	13	379.7	9.3	152.7	24.1	91.4	22.9	61.2	25.3	112	155.4
0	MOPT	3.5	1	2006	7-10	0	1	0.404694	1.08	0.43707	180	14	379.7	9.3	152.7	24.1	91.4	22.9	61.2	25.3	112	155.4
0	MOPT	3.5	1	2006	7-10	0	1	0.404694	1.08	0.43707	180	14	379.7	9.3	152.7	24.1	91.4	22.9	61.2	25.3	112	155.4
1	MOPT	3.5	1	2006	7-10	0	1	0.404694	1.08	0.43707	180	14	379.7	9.3	152.7	24.1	91.4	22.9	61.2	25.3	112	155.4
0	MOPT	3.5	1	2007	3-6	9	0	0	0.74	0.299474	180	25	709.7	7.6	182.4	23	72.6	21.4	109.7	24.6	91.4	152.7
0	MOPT	3.5	1	2007	3-6	9	0	0	0.74	0.299474	180	25	709.7	7.6	182.4	23	72.6	21.4	109.7	24.6	91.4	152.7
0	MOPT	3.5	1	2007	3-6	9	0	0	0.74	0.299474	180	25	709.7	7.6	182.4	23	72.6	21.4	109.7	24.6	91.4	152.7
0	MOPT	3.5	1	2007	3-6	9	0	0	0.74	0.299474	180	25	709.7	7.6	182.4	23	72.6	21.4	109.7	24.6	91.4	152.7
0	MOPT	3.5	1	2007	3-6	9	0	0	0.74	0.299474	180	25	709.7	7.6	182.4	23	72.6	21.4	109.7	24.6	91.4	152.7
0	MOPT	3.5	1	2007	3-6	9	0	0	0.74	0.299474	180	25	709.7	7.6	182.4	23	72.6	21.4	109.7	24.6	91.4	152.7
0	MOPT	3.5	1	2007	3-6	9	0	0	0.74	0.299474	180	25	709.7	7.6	182.4	23	72.6	21.4	109.7	24.6	91.4	152.7
0	MOPT	3.5	1	2007	3-6	9	0	0	0.74	0.299474	180	25	709.7	7.6	182.4	23	72.6	21.4	109.7	24.6	91.4	152.7
1	MOPT	3.5	1	2007	3-6	9	0	0	0.74	0.299474	180	25	709.7	7.6	182.4	23	72.6	21.4	109.7	24.6	91.4	152.7
1	MOPT	3.5	1	2007	7-10	10	0	0	0.74	0.299474	180	26	709.7	7.6	182.4	23	72.6	21.4	109.7	24.6	91.4	152.7
0	MOPT	3.5	1	2007	3-6	9	0	0	0.74	0.299474	180	25	709.7	7.6	182.4	23	72.6	21.4	109.7	24.6	91.4	152.7
0	OFPA	3	2	2003	3-6	0	2.1	0.849858	2.16	0.87414	180	66	480.1	7.8	124.2	22.6	111.3	20.1	13	25.2	34.5	56.1
0	OFPA	3	2	2003	3-6	0	2.1	0.849858	2.16	0.87414	180	66	480.1	7.8	124.2	22.6	111.3	20.1	13	25.2	34.5	56.1
0	OFPA	3	2	2003	3-6	0	2.1	0.849858	2.16	0.87414	180	66	480.1	7.8	124.2	22.6	111.3	20.1	13	25.2	34.5	56.1
0	OFPA	3	2	2004	3-6	0	2.1	0.849858	2.14	0.866046	180	78	378	8.2	173.7	20.9	43.2	19.7	130.6	22.2	111.3	124.2
0	OFPA	3	2	2004	3-6	0	2.1	0.849858	2.14	0.866046	180	78	378	8.2	173.7	20.9	43.2	19.7	130.6	22.2	111.3	124.2
0	OFPA	3	2	2004	3-6	0	2.1	0.849858	2.14	0.866046	180	78	378	8.2	173.7	20.9	43.2	19.7	130.6	22.2	111.3	124.2
0	OFPA	3	2	2004	3-6	0	2.1	0.849858	2.14	0.866046	180	78	378	8.2	173.7	20.9	43.2	19.7	130.6	22.2	111.3	124.2
0	OFPA	3	2	2004	3-6	0	2.1	0.849858	2.14	0.866046	180	78	378	8.2	173.7	20.9	43.2	19.7	130.6	22.2	111.3	124.2
0	OFPA	3	2	2004	3-6	0	2.1	0.849858	2.14	0.866046	180	78	378	8.2	173.7	20.9	43.2	19.7	130.6	22.2	111.3	124.2
0	OFPA	3	2	2004	3-6	0	2.1	0.849858	2.14	0.866046	180	78	378	8.2	173.7	20.9	43.2	19.7	130.6	22.2	111.3	124.2
1	OFPA	3	2	2004	7-10	1	0	0	2.14	0.866046	180	79	378	8.2	173.7	20.9	43.2	19.7	130.6	22.2	111.3	124.2
0	OFPA	3	2	2007	3-6	0	1.5	0.607042	1.86	0.752732	180	1	709.7	7.6	182.4	23	72.6	21.4	109.7	24.6	91.4	152.7
0	OFPA	3	2	2007	3-6	0	1.5	0.607042	1.86	0.752732	180	1	709.7	7.6	182.4	23	72.6	21.4	109.7	24.6	91.4	152.7
0	OFPA	3	2	2007	3-6	0	1.5	0.607042	1.86	0.752732	180	1	709.7	7.6	182.4	23	72.6	21.4	109.7	24.6	91.4	152.7
0	OFPA	3	2	2007	3-6	0	1.5	0.607042	1.86	0.752732	180	1	709.7	7.6	182.4	23	72.6	21.4	109.7	24.6	91.4	152.7
0	OFPA	3	2	2007	3-6	0	1.5	0.607042	1.86	0.752732	180	1	709.7	7.6	182.4	23	72.6	21.4	109.7	24.6	91.4	152.7
0	OFPA	3	2	2007	3-6	0	1.5	0.607042	1.86	0.752732	180	1	709.7	7.6	182.4	23	72.6	21.4	109.7	24.6	91.4	152.7
0	OFPA	3	2	2007	3-6	0	1.5	0.607042	1.86	0.752732	180	1	709.7	7.6	182.4	23	72.6	21.4	109.7	24.6	91.4	152.7
0	OFPA	3	2	2007	3-6	0	1.5	0.607042	1.86	0.752732	180	1	709.7	7.6	182.4	23	72.6	21.4	109.7	24.6	91.4	152.7
0	OFPA	3	2	2007	7-10	0	1.5	0.607042	1.86	0.752732	180	2	709.7	7.6	182.4	23	72.6	21.4	109.7	24.6	91.4	152.7
0	MOFL	2.33	2	2003	3-6	180	0	0	0	0	10	37	480.1	7.8	124.2	22.6	111.3	20.1	13	25.2	34.5	56.1
0	MOFV	2	2	2005	3-6	180	0	0	0	0	10	109	510.5	8.4	155.4	23.7	112	22.3	43.4	25	43.2	173.7
0	MOFV	2	2	2005	7-10	180	0	0	0	0	11	110	510.5	8.4	155.4	23.7	112	22.3	43.4	25	43.2	173.7
0	MOFV	2	2	2005	7-10	180	0	0	0	0	11	110	510.5	8.4	155.4	23.7	112	22.3	43.4	25	43.2	173.7
0	MOFV	2	2	2005	7-10	180	0	0	0	0	11	110	510.5	8.4	155.4	23.7	112	22.3	43.4	25	43.2	173.7
0	MOFV	2	2	2005	7-10	180	0	0	0	0	11	110	510.5	8.4	155.4	23.7	112	22.3	43.4	25	43.2	173.7
0	MOFV	2	2	2006	3-6	180	0	0	0	0	180	121	379.7	9.3	152.7	24.1	91.4	22.9	61.2	25.3	112	155.4
0	MOFV	2	2	2006	3-6	180	0	0	0	0	180	121	379.7	9.3	152.7	24.1	91.4	22.9	61.2	25.3	112	155.4
0	MOFV	2	2	2006	3-6	180	0	0	0	0	180	121	379.7	9.3	152.7	24.1	91.4	22.9	61.2	25.3	112	155.4
1	MOFV	2	2	2006	7-10	180	0	0	0	0	11	122	379.7	9.3	152.7	24.1	91.4	22.9	61.2	25.3	112	155.4
1	MOFV	2	2	2006	7-10	180	0	0	0	0	11	122	379.7	9.3	152.7	24.1	91.4	22.9	61.2	25.3	112	155.4
0	WRMP	3	1	2005	3-6	8	0	0	0.92	0.372319	180	37	510.5	8.4	155.4	23.7	112	22.3	43.4	25	43.2	173.7
0	WRMP	3	1	2005	3-6	8	0	0	0.92	0.372319	180	37	510.5	8.4	155.4	23.7	112	22.3	43.4	25	43.2	173.7
0	WRMP	3	1	2005	3-6	8	0	0	0.92	0.372319	180	37	510.5	8.4	155.4	23.7	112	22.3	43.4	25	43.2	173.7
0	WRMP	3	1	2005	3-6	8	0	0	0.92	0.372319	180	37	510.5	8.4	155.4	23.7	112	22.3	43.4	25	43.2	173.7
0	WRMP	3	1	2005	3-6	8	0	0	0.92	0.372319	180	37	510.5	8.4	155.4	23.7	112	22.3	43.4	25	43.2	173.7
0	WRMP	3	1	2005	3-6	8	0	0	0.92	0.372319	180	37	510.5	8.4	155.4	23.7	112	22.3	43.4	25	43.2	173.7
0	WRMP	3	1	2005	3-6	8	0	0	0.92	0.372319	180	37	510.5	8.4	155.4	23.7	112	22.3	43.4	25	43.2	173.7
0	WRMP	3	1	2005	3-6	8	0	0	0.92	0.372319	180	37	510.5	8.4	155.4	23.7	112	22.3	43.4	25	43.2	173.7
0	WRMP	3	1	2005	3-6	8	0	0	0.92	0.372319	180	37	510.5	8.4	155.4	23.7	112	22.3	43.4	25	43.2	173.7
0	WRMP	3	1	2005	3-6	8	0	0	0.92	0.372319	180	37	510.5	8.4	155.4	23.7	112	22.3	43.4	25	43.2	173.7
0	WRMP	3	1	2005	3-6	8	0	0	0.92	0.372319	180	37	510.5	8.4	155.4	23.7	112	22.3	43.4	25	43.2	173.7

## Sheet: Abundance_and_HY_metadata
Flooding Frquency (As an indicator of Mesic to Xeric)
Source: USDA-NRCS Web Soil Survey (2016)
Frequency is expressed as none, very rare, rare, occasional, frequent, and very frequent (Likert Scale = 0-5)
All soil types within sampling footprint are averaged for flooding frequency to estimate site flooding frequency. In the absence of a site map a 300m by 300m site map was imposed over the centerpoint of the netting location.
If over 3 soil types were included in the footpring the top three were selected to produce average.
Score	Description
0	None means that flooding is not probable. The chance of flooding is nearly 0 percent in any year. Flooding occurs less than once in 500 years.
1	Very rare means that flooding is very unlikely but possible under extremely unusual weather conditions. The chance of flooding is less than 1 percent in any year.
2	Rare means that flooding is unlikely but possible under unusual weather conditions. The chance of flooding is 1 to 5 percent in any year.
3	Occasional means that flooding occurs infrequently under normal weather conditions. The chance of flooding is 5 to 50 percent in any year.
4	Frequent means that flooding is likely to occur often under normal weather conditions. The chance of flooding is more than 50 percent in any year but is less than 50 percent in all months in any year.
5	Very frequent means that flooding is likely to occur very often under normal weather conditions. The chance of flooding is more than 50 percent in all months of any year.
	Survey Staff, Natural Resources Conservation Service, United States Department of Agriculture. Web Soil Survey.
	Available online at http://websoilsurvey.nrcs.usda.gov/ . Accessed 03/25/2016.
Relict, Restored, Reconstructed (Describes landuse history with implications for prairie quality)
Source: Caven et al. 2017. Journal of Insect Conservation. 21:183
	Land use history variables should be coded as a factor.
1	Relict: never been tilled, planted with non-native species, been allowed to become a different system (forest), or been over-utilized to the degree that a majority of relict components (dominant native grasses and forbs) were absent.
2	Restored: at one time had been planted with non-native species for livestock forage, intensively managed to the degree it lacked a majority of relict components, or was allowed to become forest/woodland, and subsequent efforts had been taken to restore it to native prairie.
3	Reconstructed: been intensively tilled, used as agricultural land, and subsequently seeded and replanted with native prairie species suspected to have inhabited that area in the past.
Soil Code	The numbers below correspond to a specific soil type this could also be included in habitat analyses as a factor but is not listed in the current database.
	Results
	Site/Score	Soil Code 1	Soil Code 2	Soil Code 3	Mesic	Landuse
	FONE	2344	4232	4227	*	*
	*	1	2	3	2	1
	MOFE	1021	8588	*	*	*
	*	2	2	*	2	1
	MOFF	8588	8585	4222	*	*
	*	2	2	3	2.33333	3
	MOFN	4222	8588	*	*	*
		3	2	*	2.5	1
	MOFR	4232	6310	*	*	*
	*	2	4	*	3	1
	MOFT	6310	*	*	*	*
		4	*	*	4	1
	MOPT	6322	4227	*	*	*
		4	3	*	3.5	1
	NOME	4232	8570	4227	*	*
		2	3	3	2.66667	1
	WRPM	8570	*	*	*	*
		3	*	*	3	2
	WRBS	4220	2344	8572	*	*
		3	1	3	2.33	1
	FETW	6322	8572	6310	*	*
		4	3	4	3.66667	1
	CRME	4227	*	*	*	*
		3	*	*	3	3
	OFPA	8570	4227	*	*	*
		3	3	*	3	2
	MOFL	4220	4232	8588	*	*
		3	2	2	2.33	3
	MOFV	8585	*	*	*	*
		2	*	*	2	3
	WRMP	4227	*	*	*	*
		3	*	*	3	1
